# Supplementary material for: The long noncoding RNA ADIPINT is a gatekeeper of pyruvate carboxylase function regulating human fat cell metabolism
Source: Research Square preprint supplement (doi:10.21203/rs.3.rs-83614/v1), 2021-05-05
Supplement: Supplementary file 1 [file 876d1e2a1f11e0aa5838eb14.xlsx]

## Sheet: Supplementary Table 1
Supplementary Table 1. Clinical Characteristics in women undergoing bariatric surgery
	Baseline	2 y's post-surgery	0 vs 2 y's
	(n=50)	(n=49)	P
Age (years)	43±9	45±9	<0.0001
Weight (kg)	118±15	80±14	<0.0001
Body mass index (kg/m2)	43±5	29±4	<0.0001
Total fat mass (kg)	61±10	31±11	<0.0001
P-Glucose (mmol/l)	5.6±1.4	4.9±0.6	<0.0001
S-Insulin (mU/l)	15.5±8.4	4.9±1.9	<0.0001
P-Cholesterol (mmol/l)	4.8±1.0	4.0±0.8	<0.0001
P-Triglycerides (mmol/l)	1.5±0.7	0.9±0.4	<0.0001
P-HDL cholesterol (mmol/l)	1.2±0.3	1.5±0.3	<0.0001
HOMA-IR (units)	4.0±2.6	1.0±0.4	<0.0001
Fat cell volume (pL)	970±185	466±174	<0.0001
Clinical Characteristics in women before and two years post bariatric surgery.
Baseline refers to examinations made just before bariatric surgery with 2 years postoperatively denoting the time post bariatric surgery.
Values presented are mean ± SD. Statistical comparisons were made using paired Student t-test for same subjects at different time points.
HOMA-IR is a measure of insulin sensitivity

## Sheet: Supplementary Table 2
Supplementary Table 2. Genes differentially expressed between baseline and 2 years post bariatric surgery
geneID	geneName	geneClass	Fold change	t-statistic	p-value	FDR (q-value)
CATG00000012385.1	CATG00000012385.1	lncRNA_antisense	0.256085	11.7676	9.45126e-16	2.51912e-12
CATG00000106343.1	CATG00000106343.1	lncRNA_intergenic	0.355208	11.3329	3.60201e-15	5.92105e-12
ENSG00000261602.1	CTD-2033A16.1	lncRNA_antisense	0.370816	11.5926	1.61504e-15	3.44375e-12
ENSG00000235782.1	RP3-333A15.1	lncRNA_antisense	0.441851	9.80855	4.75093e-13	2.73795e-10
ENSG00000259590.1	RP11-20G13.3	lncRNA_intergenic	0.449161	7.91965	2.91291e-10	6.27394e-08
CATG00000111229.1	CATG00000111229.1	lncRNA_intergenic	0.469031	8.53391	3.47724e-11	9.54826e-09
CATG00000006954.1	CATG00000006954.1	lncRNA_intergenic	0.494793	7.55506	1.04223e-09	1.91582e-07
CATG00000049298.1	CATG00000049298.1	lncRNA_intergenic	0.53407	8.34169	6.73939e-11	1.73137e-08
ENSG00000246430.2	LINC00968	lncRNA_intergenic	0.550407	7.47745	1.3685e-09	2.3724e-07
CATG00000118013.1	CATG00000118013.1	lncRNA_intergenic	0.561972	10.3994	6.91742e-14	5.9e-11
ENSG00000236404.4	RP11-125B21.2	lncRNA_divergent	0.586998	5.83316	4.50397e-07	3.50504e-05
CATG00000015962.1	CATG00000015962.1	lncRNA_divergent	0.587746	6.20304	1.22669e-07	1.10834e-05
ENSG00000250777.1	RP13-884E18.4	lncRNA_intergenic	0.591249	8.02111	2.04625e-10	4.69163e-08
CATG00000072539.1	CATG00000072539.1	lncRNA_antisense	0.604355	8.97743	7.65525e-12	2.55051e-09
ENSG00000249835.2	VCAN-AS1	lncRNA_antisense	0.619153	7.78168	4.7142e-10	9.45731e-08
CATG00000056409.1	CATG00000056409.1	lncRNA_intergenic	0.627441	6.02042	2.33358e-07	1.95901e-05
ENSG00000224397.1	RP11-290F20.3	lncRNA_intergenic	0.628418	8.98204	7.53647e-12	2.55051e-09
ENSG00000234754.1	RP11-421L10.1	lncRNA_intergenic	0.631001	8.57998	2.9688e-11	8.44049e-09
CATG00000048734.1	CATG00000048734.1	lncRNA_sense_intronic	0.63584	4.87401	1.23648e-05	0.000579668
ENSG00000230269.2	RP1-40E16.9	lncRNA_intergenic	0.636019	7.6768	6.80307e-10	1.30686e-07
CATG00000038448.1	CATG00000038448.1	lncRNA_divergent	0.642258	7.86494	3.5251e-10	7.38794e-08
CATG00000048722.1	CATG00000048722.1	lncRNA_sense_intronic	0.644077	3.91405	0.000285792	0.00762697
CATG00000048453.1	CATG00000048453.1	lncRNA_intergenic	0.655382	6.50265	4.2607e-08	4.34693e-06
ENSG00000248323.1	LUCAT1	lncRNA_intergenic	0.658635	5.08094	6.11595e-06	0.000326843
CATG00000061353.1	CATG00000061353.1	lncRNA_intergenic	0.660875	9.00578	6.95402e-12	2.39162e-09
ENSG00000110347.7	MMP12	lncRNA_intergenic	0.663404	4.65925	2.54567e-05	0.00106226
ENSG00000262179.2	RP1-302G2.5	lncRNA_intergenic	0.663685	6.84743	1.26021e-08	1.59003e-06
CATG00000007894.1	CATG00000007894.1	lncRNA_antisense	0.671239	6.74799	1.79065e-08	2.14506e-06
CATG00000039787.1	CATG00000039787.1	lncRNA_sense_intronic	0.671904	4.70585	2.1782e-05	0.000932647
ENSG00000222041.6	LINC00152	lncRNA_intergenic	0.673426	10.3462	8.2134e-14	6.73593e-11
ENSG00000248429.1	RP11-597D13.9	lncRNA_divergent	0.68109	4.87307	1.2404e-05	0.000579668
ENSG00000272142.1	RP11-428J1.5	lncRNA_divergent	0.6836	7.06713	5.80224e-09	8.05e-07
ENSG00000260257.1	RP5-1085F17.3	lncRNA_intergenic	0.684955	7.79162	4.55334e-10	9.24675e-08
CATG00000008983.1	CATG00000008983.1	lncRNA_intergenic	0.685537	6.62997	2.71713e-08	2.97114e-06
ENSG00000271367.1	RP3-483K16.4	lncRNA_divergent	0.687868	6.63506	2.66873e-08	2.94002e-06
CATG00000068362.1	CATG00000068362.1	lncRNA_intergenic	0.694713	6.83153	1.33301e-08	1.66728e-06
CATG00000056788.1	CATG00000056788.1	lncRNA_sense_intronic	0.696583	5.31298	2.75501e-06	0.000167365
ENSG00000226822.1	RP11-356N1.2	lncRNA_intergenic	0.705808	6.74105	1.83511e-08	2.17389e-06
ENSG00000225511.2	LINC00475	lncRNA_intergenic	0.707507	5.07682	6.20256e-06	0.000329818
CATG00000008146.1	CATG00000008146.1	lncRNA_antisense	0.714143	6.50091	4.28692e-08	4.35285e-06
CATG00000045713.1	CATG00000045713.1	lncRNA_intergenic	0.715964	7.52853	1.14387e-09	2.03256e-07
CATG00000070697.1	CATG00000070697.1	lncRNA_intergenic	0.716369	4.41921	5.63822e-05	0.00202397
CATG00000108418.1	CATG00000108418.1	lncRNA_antisense	0.716775	6.21576	1.1729e-07	1.06879e-05
ENSG00000226453.1	RP11-379B8.1	lncRNA_intergenic	0.721148	6.18179	1.32214e-07	1.17467e-05
CATG00000023546.1	CATG00000023546.1	lncRNA_divergent	0.722169	6.99129	7.58264e-09	1.01689e-06
CATG00000045675.1	CATG00000045675.1	lncRNA_antisense	0.727089	5.1499	4.82941e-06	0.000272511
ENSG00000231090.1	RP11-101C11.1	lncRNA_divergent	0.728221	6.89988	1.04709e-08	1.35315e-06
ENSG00000227591.1	RP1-28O10.1	lncRNA_divergent	0.730388	4.52718	3.94941e-05	0.00149846
CATG00000051324.1	CATG00000051324.1	lncRNA_divergent	0.732043	6.35322	7.22186e-08	6.87463e-06
ENSG00000233429.5	HOTAIRM1	lncRNA_divergent	0.734844	6.03592	2.20975e-07	1.88474e-05
CATG00000050208.1	CATG00000050208.1	lncRNA_sense_intronic	0.735572	5.25235	3.39579e-06	0.000200023
ENSG00000256164.1	RP11-264F23.3	lncRNA_divergent	0.736301	6.8682	1.17106e-08	1.49524e-06
CATG00000113787.1	CATG00000113787.1	lncRNA_antisense	0.740374	6.54499	3.66879e-08	3.91148e-06
ENSG00000179428.2	AC073072.5	lncRNA_antisense	0.740793	4.16394	0.000129244	0.00397671
ENSG00000236700.1	LINC01010	lncRNA_intergenic	0.741108	6.69958	2.12468e-08	2.43573e-06
ENSG00000251432.2	RP11-420A23.1	lncRNA_divergent	0.744154	4.97506	8.77604e-06	0.00043418
CATG00000112739.1	CATG00000112739.1	lncRNA_intergenic	0.745418	10.0772	1.96771e-13	1.39858e-10
ENSG00000235092.1	AC011747.7	lncRNA_divergent	0.746474	5.56827	1.13656e-06	7.94585e-05
ENSG00000258017.1	RP11-386G11.10	lncRNA_divergent	0.747002	8.87952	1.0674e-11	3.34709e-09
ENSG00000231312.2	AC007246.3	lncRNA_divergent	0.747002	3.88661	0.000311432	0.0081281
ENSG00000258096.1	RP11-474P2.2	lncRNA_divergent	0.747425	5.34741	2.44602e-06	0.000151618
ENSG00000204588.5	AC013268.5	lncRNA_intergenic	0.748165	6.7444	1.81346e-08	2.16025e-06
CATG00000111739.1	CATG00000111739.1	lncRNA_intergenic	0.748694	6.95882	8.5036e-09	1.12623e-06
CATG00000050209.1	CATG00000050209.1	lncRNA_sense_intronic	0.750709	8.55254	3.26179e-11	9.15146e-09
ENSG00000233554.1	RP11-326F20.5	lncRNA_divergent	0.753156	4.05807	0.000181328	0.00529652
CATG00000007487.1	CATG00000007487.1	lncRNA_divergent	0.753795	4.56949	3.4326e-05	0.00134054
ENSG00000250303.2	RP11-356J5.12	lncRNA_intergenic	0.755824	4.05457	0.000183358	0.00534117
CATG00000087505.1	CATG00000087505.1	lncRNA_antisense	0.757965	3.87866	0.000319266	0.00827182
CATG00000002557.1	CATG00000002557.1	lncRNA_intergenic	0.759038	4.94046	9.87102e-06	0.000478363
ENSG00000253139.1	RP11-17A4.3	lncRNA_sense_intronic	0.761189	4.06834	0.000175492	0.00514015
ENSG00000258667.1	HIF1A-AS2	lncRNA_divergent	0.763886	5.03841	7.07216e-06	0.000368704
ENSG00000248187.1	RP11-184M15.1	lncRNA_intergenic	0.764426	6.78484	1.57204e-08	1.92647e-06
ENSG00000263426.1	RN7SL471P	lncRNA_intergenic	0.7667	6.49588	4.36371e-08	4.40983e-06
ENSG00000236914.3	RP11-1008C21.2	lncRNA_intergenic	0.768112	4.61021	2.99798e-05	0.00120866
CATG00000011086.1	CATG00000011086.1	lncRNA_intergenic	0.76822	7.89436	3.1813e-10	6.78348e-08
ENSG00000234327.3	AC012146.7	lncRNA_divergent	0.77116	5.08215	6.09071e-06	0.000326541
ENSG00000255422.1	AP002954.4	lncRNA_intergenic	0.771487	5.18575	4.27015e-06	0.000243455
CATG00000007848.1	CATG00000007848.1	lncRNA_divergent	0.77247	6.83066	1.33708e-08	1.66728e-06
CATG00000057939.1	CATG00000057939.1	lncRNA_divergent	0.773564	4.35734	6.90504e-05	0.00237861
ENSG00000257086.1	RP11-783K16.13	lncRNA_intergenic	0.774768	10.4194	6.4868e-14	5.76325e-11
ENSG00000255197.1	RP11-750H9.5	lncRNA_intergenic	0.774878	6.53416	3.81178e-08	4.04371e-06
ENSG00000227082.1	AL592494.5	lncRNA_intergenic	0.775536	5.09264	5.87593e-06	0.000317196
ENSG00000223561.2	AC003090.1	lncRNA_intergenic	0.778944	4.98222	8.56459e-06	0.000427688
ENSG00000249378.1	LINC01060	lncRNA_intergenic	0.780047	3.62071	0.000706238	0.0154611
ENSG00000226197.2	RP11-536O18.1	lncRNA_intergenic	0.780157	4.7149	2.11313e-05	0.000906629
CATG00000006850.1	CATG00000006850.1	lncRNA_antisense	0.78093	5.35729	2.36383e-06	0.00014695
ENSG00000237513.1	RP11-325F22.2	lncRNA_intergenic	0.783697	5.49134	1.48529e-06	9.99079e-05
ENSG00000251442.1	RP11-792D21.2	lncRNA_intergenic	0.783697	7.11514	4.89845e-09	7.20342e-07
ENSG00000273184.1	RP11-212P7.3	lncRNA_divergent	0.783808	3.41833	0.00129346	0.0245378
ENSG00000172965.10	MIR4435-1HG	lncRNA_intergenic	0.784917	9.09613	5.12285e-12	1.88335e-09
ENSG00000224596.3	ZMIZ1-AS1	lncRNA_intergenic	0.785695	3.25827	0.00206227	0.0352073
CATG00000038686.1	CATG00000038686.1	lncRNA_antisense	0.786696	4.16524	0.000128706	0.0039659
ENSG00000224939.1	LINC00184	lncRNA_intergenic	0.786918	5.56249	1.15967e-06	8.04771e-05
CATG00000108682.1	CATG00000108682.1	lncRNA_divergent	0.787586	4.91962	1.05946e-05	0.000508805
ENSG00000260578.1	CTD-2541J13.1	lncRNA_intergenic	0.793963	3.73652	0.000495962	0.0116726
ENSG00000267052.1	CTB-30L5.1	lncRNA_sense_intronic	0.796212	4.74124	1.93441e-05	0.000841783
ENSG00000267484.1	CTC-518P12.6	lncRNA_antisense	0.796663	4.20202	0.000114333	0.00361058
ENSG00000244952.2	RP11-1000B6.5	lncRNA_intergenic	0.797677	4.7503	1.87647e-05	0.000821601
CATG00000015649.1	CATG00000015649.1	lncRNA_intergenic	0.798016	6.02605	2.28787e-07	1.93589e-05
CATG00000018513.1	CATG00000018513.1	lncRNA_divergent	0.799937	6.00476	2.46568e-07	2.05374e-05
ENSG00000251194.2	RP1-68D18.2	lncRNA_sense_intronic	0.800843	3.31542	0.00174808	0.0309074
CATG00000094163.1	CATG00000094163.1	lncRNA_divergent	0.80107	4.12546	0.000146227	0.00440396
ENSG00000234076.1	TPRG1-AS1	lncRNA_divergent	0.80141	3.45441	0.00116262	0.0225985
CATG00000032371.1	CATG00000032371.1	lncRNA_divergent	0.801523	6.932	9.34801e-09	1.23042e-06
ENSG00000271984.1	RP3-337O18.9	lncRNA_divergent	0.80175	7.6525	7.40705e-10	1.41018e-07
ENSG00000225216.2	AC007362.3	lncRNA_divergent	0.802431	7.21673	3.42409e-09	5.21513e-07
ENSG00000253217.1	KB-1991G8.1	lncRNA_divergent	0.80516	5.02122	7.49926e-06	0.000383469
CATG00000062309.1	CATG00000062309.1	lncRNA_intergenic	0.806756	4.20829	0.000112042	0.00356045
ENSG00000254418.1	RP11-21L19.1	lncRNA_intergenic	0.80687	4.65842	2.55273e-05	0.00106312
CATG00000011503.1	CATG00000011503.1	lncRNA_sense_intronic	0.807669	4.88634	1.18593e-05	0.0005607
CATG00000082230.1	CATG00000082230.1	lncRNA_divergent	0.808813	3.9705	0.000239304	0.00660114
ENSG00000233175.2	CTD-2020K17.3	lncRNA_divergent	0.810301	5.16403	4.60084e-06	0.000260914
CATG00000115971.1	CATG00000115971.1	lncRNA_intergenic	0.81076	4.73718	1.96094e-05	0.000851591
ENSG00000246582.2	RP11-1149O23.3	lncRNA_divergent	0.811448	4.87387	1.23708e-05	0.000579668
ENSG00000130600.11	H19	lncRNA_intergenic	0.813172	4.87181	1.24574e-05	0.000579978
CATG00000089511.1	CATG00000089511.1	lncRNA_intergenic	0.813287	4.15705	0.000132139	0.00404247
CATG00000070170.1	CATG00000070170.1	lncRNA_intergenic	0.813402	3.29113	0.00187566	0.0326221
ENSG00000267121.1	CTD-2020K17.1	lncRNA_divergent	0.814784	4.98258	8.55419e-06	0.000427688
ENSG00000230113.1	AC091177.1	lncRNA_divergent	0.816053	4.0782	0.000170065	0.00502953
ENSG00000230479.1	AP000695.6	lncRNA_sense_intronic	0.816515	3.65112	0.000643966	0.0144236
CATG00000076708.1	CATG00000076708.1	lncRNA_intergenic	0.820916	4.38768	6.25238e-05	0.00219999
ENSG00000229989.3	MIR181A1HG	lncRNA_intergenic	0.821497	4.3563	6.92851e-05	0.00238285
CATG00000117071.1	CATG00000117071.1	lncRNA_intergenic	0.821497	3.94335	0.000260674	0.00704453
CATG00000015370.1	CATG00000015370.1	lncRNA_intergenic	0.821729	3.4675	0.00111832	0.0219981
ENSG00000264456.1	RP11-848P1.2	lncRNA_sense_intronic	0.822659	3.63991	0.000666286	0.0147531
ENSG00000230091.2	TMEM254-AS1	lncRNA_divergent	0.822776	4.6511	2.61591e-05	0.00108309
ENSG00000270412.1	RP11-92C4.6	lncRNA_divergent	0.822776	4.43664	5.32432e-05	0.00193738
ENSG00000228623.2	ZNF883	lncRNA_intergenic	0.823009	3.5479	0.000879669	0.0182286
ENSG00000226031.1	FGF13-AS1	lncRNA_divergent	0.823707	3.25849	0.00206094	0.0352073
ENSG00000248441.2	CTD-2536I1.1	lncRNA_intergenic	0.824057	4.03716	0.00019379	0.00558404
CATG00000059542.1	CATG00000059542.1	lncRNA_divergent	0.824757	3.88532	0.000312695	0.00815108
ENSG00000247774.2	PCED1B-AS1	lncRNA_divergent	0.824757	5.25557	3.35829e-06	0.000198362
CATG00000098325.1	CATG00000098325.1	lncRNA_divergent	0.825457	3.47729	0.00108627	0.0216069
ENSG00000255071.1	SAA2-SAA4	lncRNA_intergenic	0.825691	4.00523	0.000214436	0.00599269
ENSG00000267601.1	RP11-323N12.5	lncRNA_divergent	0.826392	3.84528	0.000354288	0.00899343
ENSG00000225778.1	PROSER2-AS1	lncRNA_antisense	0.82686	5.07908	6.1548e-06	0.000328097
ENSG00000256084.1	RP11-134N1.2	lncRNA_intergenic	0.827445	6.68417	2.24353e-08	2.54462e-06
ENSG00000247271.2	ZBED5-AS1	lncRNA_divergent	0.827679	3.5361	0.000911356	0.0187034
ENSG00000104691.10	UBXN8	lncRNA_intergenic	0.830846	4.54866	3.67817e-05	0.0014106
CATG00000032222.1	CATG00000032222.1	lncRNA_intergenic	0.831081	4.32997	7.55021e-05	0.00256359
ENSG00000234026.1	RP11-310E22.4	lncRNA_intergenic	0.831434	4.26117	9.44284e-05	0.00306468
CATG00000099515.1	CATG00000099515.1	lncRNA_intergenic	0.831552	3.14171	0.00287581	0.0448251
ENSG00000233521.1	RP5-1172A22.1	lncRNA_intergenic	0.83214	4.31921	7.81965e-05	0.00264245
ENSG00000267272.1	RP5-1052I5.1	lncRNA_sense_intronic	0.833082	4.28188	8.82928e-05	0.00290984
ENSG00000245281.2	CTD-2547L16.1	lncRNA_divergent	0.834025	3.6116	0.000726006	0.0158111
CATG00000017122.1	CATG00000017122.1	lncRNA_divergent	0.834261	3.87901	0.000318919	0.00827182
ENSG00000232485.2	AC098820.3	lncRNA_divergent	0.837809	3.25164	0.00210202	0.0356008
ENSG00000233574.1	CTA-929C8.5	lncRNA_intergenic	0.838283	3.67689	0.000595329	0.0136058
CATG00000014466.1	CATG00000014466.1	lncRNA_divergent	0.838402	4.5406	3.77782e-05	0.00144363
ENSG00000269973.1	RP11-95D17.1	lncRNA_intergenic	0.838639	4.62723	2.83266e-05	0.00115489
ENSG00000272703.1	RP11-78A19.4	lncRNA_divergent	0.838758	7.36145	2.05731e-09	3.32334e-07
ENSG00000259985.1	RP11-549B18.1	lncRNA_divergent	0.839827	3.87974	0.000318193	0.00826411
ENSG00000223478.1	RP11-545E17.3	lncRNA_divergent	0.840421	4.27098	9.14717e-05	0.00298234
ENSG00000132832.5	RP11-445H22.3	lncRNA_intergenic	0.841134	3.23524	0.00220337	0.036878
CATG00000082540.1	CATG00000082540.1	lncRNA_antisense	0.841253	3.48261	0.00106922	0.0214071
ENSG00000226149.1	RP1-69D17.4	lncRNA_intergenic	0.842087	4.68038	2.37206e-05	0.00100157
CATG00000009732.1	CATG00000009732.1	lncRNA_sense_intronic	0.842325	3.76003	0.000461338	0.0110845
ENSG00000261472.1	RP11-467I17.1	lncRNA_intergenic	0.842563	3.54237	0.000894381	0.0183904
CATG00000001975.1	CATG00000001975.1	lncRNA_divergent	0.842683	4.15453	0.00013321	0.00405777
CATG00000061359.1	CATG00000061359.1	lncRNA_intergenic	0.844473	4.05017	0.000185942	0.00540905
ENSG00000235027.1	AC068580.6	lncRNA_divergent	0.844951	5.57793	1.09895e-06	7.73365e-05
ENSG00000258232.2	RP11-161H23.5	lncRNA_antisense	0.844951	4.42339	5.56136e-05	0.00200053
ENSG00000264044.1	RP11-192H23.7	lncRNA_divergent	0.84507	5.99513	2.55064e-07	2.11624e-05
CATG00000063762.1	CATG00000063762.1	lncRNA_intergenic	0.846027	4.39086	6.18758e-05	0.00219146
ENSG00000224409.1	RP11-114B7.6	lncRNA_intergenic	0.846865	5.03639	7.12101e-06	0.000369443
ENSG00000258702.1	RP11-433J8.1	lncRNA_intergenic	0.847944	3.57815	0.000803169	0.0169562
ENSG00000223949.2	RP11-24J23.2	lncRNA_antisense	0.847944	4.76283	1.79906e-05	0.00079423
CATG00000087818.1	CATG00000087818.1	lncRNA_divergent	0.848664	3.59005	0.000774854	0.0165886
ENSG00000266389.1	CTB-41I6.1	lncRNA_divergent	0.848904	4.00607	0.000213866	0.0059846
CATG00000074964.1	CATG00000074964.1	lncRNA_divergent	0.849385	3.17322	0.00263021	0.0422324
CATG00000110172.1	CATG00000110172.1	lncRNA_divergent	0.849385	4.32074	7.78085e-05	0.00263351
ENSG00000226472.3	RP11-551L14.4	lncRNA_intergenic	0.849505	4.93179	1.01661e-05	0.000491548
ENSG00000262831.1	RP11-498C9.2	lncRNA_antisense	0.850106	5.85217	4.21352e-07	3.29102e-05
ENSG00000234147.1	RP3-460G2.2	lncRNA_intergenic	0.850587	3.2554	0.00207937	0.0353576
CATG00000037912.1	CATG00000037912.1	lncRNA_intergenic	0.850828	5.36409	2.30895e-06	0.000145232
CATG00000086813.1	CATG00000086813.1	lncRNA_antisense	0.850948	3.40552	0.00134322	0.0252838
ENSG00000260946.1	RP11-407G23.3	lncRNA_antisense	0.851068	3.11617	0.00309059	0.0472406
CATG00000112205.1	CATG00000112205.1	lncRNA_intergenic	0.851068	3.45968	0.0011446	0.0223706
ENSG00000269292.1	CTB-12A17.3	lncRNA_divergent	0.85155	4.86547	1.27272e-05	0.000587406
CATG00000036636.1	CATG00000036636.1	lncRNA_antisense	0.85167	3.6639	0.000619383	0.0139906
ENSG00000261771.1	DYX1C1-CCPG1	lncRNA_intergenic	0.851911	4.85154	1.3341e-05	0.000610449
ENSG00000255248.2	RP11-166D19.1	lncRNA_intergenic	0.851912	3.84351	0.000356239	0.00902147
CATG00000015961.1	CATG00000015961.1	lncRNA_antisense	0.852032	3.67599	0.000596971	0.0136141
ENSG00000228106.1	RP11-452F19.3	lncRNA_sense_intronic	0.852876	3.82889	0.000372813	0.00936335
ENSG00000227925.1	RP11-191N8.2	lncRNA_intergenic	0.853238	3.41752	0.00129655	0.0245527
ENSG00000235385.1	GS1-600G8.5	lncRNA_intergenic	0.853238	3.47232	0.00110244	0.0218267
CATG00000043249.1	CATG00000043249.1	lncRNA_intergenic	0.8536	3.88109	0.000316855	0.00823938
ENSG00000267279.1	RP11-879F14.2	lncRNA_sense_intronic	0.853721	3.96148	0.000246207	0.00677402
ENSG00000265784.1	RP1-56K13.3	lncRNA_antisense	0.854325	5.02321	7.44845e-06	0.000382548
ENSG00000167912.5	RP11-25K19.1	lncRNA_divergent	0.854325	4.61015	2.99856e-05	0.00120866
CATG00000009086.1	CATG00000009086.1	lncRNA_divergent	0.855051	4.31337	7.9698e-05	0.00268468
CATG00000096910.1	CATG00000096910.1	lncRNA_divergent	0.855413	3.67345	0.000601621	0.0136909
ENSG00000261737.1	RP4-612B15.3	lncRNA_divergent	0.856382	3.65358	0.000639154	0.014346
ENSG00000248360.3	LINC00504	lncRNA_intergenic	0.856867	4.30151	8.28355e-05	0.0027685
ENSG00000268056.1	CTD-3032J10.2	lncRNA_divergent	0.856988	3.42303	0.00127567	0.0242627
ENSG00000265975.1	CTB-41I6.2	lncRNA_intergenic	0.85808	5.22214	3.76804e-06	0.000219524
ENSG00000265477.1	RP11-720L2.2	lncRNA_sense_intronic	0.859051	3.59969	0.000752632	0.0161778
ENSG00000235010.1	RP11-140A10.3	lncRNA_divergent	0.859294	3.33935	0.00163053	0.0293269
ENSG00000219665.4	CTD-2006C1.2	lncRNA_intergenic	0.859416	3.78949	0.000421229	0.0103359
CATG00000024308.1	CATG00000024308.1	lncRNA_antisense	0.860146	3.63174	0.000683019	0.0150455
ENSG00000224034.1	RP11-445P17.8	lncRNA_intergenic	0.860146	5.33838	2.52358e-06	0.000155267
CATG00000105272.1	CATG00000105272.1	lncRNA_antisense	0.860146	3.54967	0.000875007	0.018185
ENSG00000273341.1	RP5-899E9.1	lncRNA_intergenic	0.860267	4.1201	0.000148757	0.00446753
CATG00000019711.1	CATG00000019711.1	lncRNA_divergent	0.860876	4.81357	1.51655e-05	0.000679358
ENSG00000259716.1	RP5-977B1.11	lncRNA_divergent	0.861729	3.56103	0.000845663	0.0176439
ENSG00000231121.2	RP1-34H18.1	lncRNA_intergenic	0.862949	3.95021	0.000255102	0.00694704
CATG00000038107.1	CATG00000038107.1	lncRNA_divergent	0.863804	3.4355	0.00122955	0.0236408
ENSG00000243953.1	RP11-439C8.2	lncRNA_intergenic	0.865026	3.75943	0.000462192	0.0110858
ENSG00000260898.1	ADPGK-AS1	lncRNA_divergent	0.865271	3.36088	0.00153118	0.0280975
ENSG00000269968.1	RP5-940J5.9	lncRNA_divergent	0.865271	3.78489	0.000427272	0.0104344
ENSG00000204054.7	LINC00963	lncRNA_intergenic	0.865394	9.95712	2.91495e-13	1.94492e-10
CATG00000038679.1	CATG00000038679.1	lncRNA_divergent	0.865516	5.03763	7.09091e-06	0.000368779
ENSG00000237807.3	RP11-400K9.4	lncRNA_intergenic	0.866864	3.19301	0.00248615	0.0405292
ENSG00000232079.2	AL035610.1	lncRNA_intergenic	0.867355	3.62947	0.000687725	0.0151023
CATG00000031558.1	CATG00000031558.1	lncRNA_sense_intronic	0.867477	3.98061	0.000231791	0.0064188
ENSG00000235899.1	RP11-345L23.1	lncRNA_divergent	0.8676	3.3168	0.00174111	0.0308352
ENSG00000253982.1	CTD-2336O2.1	lncRNA_divergent	0.867723	3.24146	0.00216442	0.0363974
ENSG00000259276.1	RP11-815J21.3	lncRNA_divergent	0.867723	3.95487	0.00025139	0.00689884
ENSG00000253557.1	RP11-1080G15.1	lncRNA_intergenic	0.867723	3.1669	0.00267778	0.0428023
ENSG00000273382.1	RP5-1065J22.8	lncRNA_divergent	0.868214	3.85587	0.000342798	0.00876438
ENSG00000267365.1	KCNJ2-AS1	lncRNA_divergent	0.870304	3.35243	0.00156944	0.0286272
ENSG00000273485.1	RP11-225H22.7	lncRNA_antisense	0.871906	3.2741	0.00197029	0.0339633
ENSG00000230487.3	PSMG3-AS1	lncRNA_divergent	0.87314	3.15214	0.00279224	0.0440703
CATG00000030116.1	CATG00000030116.1	lncRNA_divergent	0.873882	4.51216	4.15068e-05	0.00157014
CATG00000025468.1	CATG00000025468.1	lncRNA_intergenic	0.8745	3.42211	0.00127912	0.0242873
CATG00000009061.1	CATG00000009061.1	lncRNA_sense_intronic	0.874748	3.33732	0.00164019	0.0294145
ENSG00000225670.3	CTA-134P22.2	lncRNA_divergent	0.87549	3.47936	0.0010796	0.0215315
ENSG00000225733.1	FGD5-AS1	lncRNA_divergent	0.875738	4.46553	4.84136e-05	0.00178603
ENSG00000236094.1	LINC00545	lncRNA_intergenic	0.876606	3.41531	0.00130502	0.0246544
ENSG00000239653.1	PSMD6-AS2	lncRNA_intergenic	0.877226	3.22759	0.00225224	0.0375485
CATG00000034259.1	CATG00000034259.1	lncRNA_intergenic	0.877847	4.18965	0.000118984	0.0037365
CATG00000074241.1	CATG00000074241.1	lncRNA_intergenic	0.878095	3.64317	0.00065972	0.0146993
ENSG00000263432.1	RN7SL689P	lncRNA_antisense	0.878592	3.58551	0.000785537	0.0167166
ENSG00000234614.1	AL450992.2	lncRNA_intergenic	0.879338	3.28257	0.00192265	0.0333035
ENSG00000259124.1	RP11-187O7.3	lncRNA_intergenic	0.880085	3.16436	0.0026972	0.0430172
CATG00000067785.1	CATG00000067785.1	lncRNA_divergent	0.881455	3.75277	0.000471773	0.0112339
ENSG00000224789.1	AC012363.4	lncRNA_intergenic	0.881455	4.3159	7.90455e-05	0.00266691
ENSG00000255443.1	RP1-68D18.4	lncRNA_divergent	0.881705	3.38455	0.00142861	0.0265351
ENSG00000268001.1	CTC-241F20.3	lncRNA_divergent	0.882328	3.14356	0.00286084	0.0448093
ENSG00000253455.1	RP11-770E5.3	lncRNA_intergenic	0.884453	3.34337	0.0016115	0.0290823
CATG00000113327.1	CATG00000113327.1	lncRNA_divergent	0.885454	3.18007	0.00257945	0.0416984
CATG00000066157.1	CATG00000066157.1	lncRNA_intergenic	0.88583	3.34324	0.00161212	0.0290823
CATG00000002414.1	CATG00000002414.1	lncRNA_intergenic	0.885955	3.86082	0.000337547	0.00866128
CATG00000109121.1	CATG00000109121.1	lncRNA_intergenic	0.886206	3.35086	0.00157667	0.0287042
ENSG00000228495.1	LINC01013	lncRNA_intergenic	0.886332	3.66443	0.000618379	0.0139827
ENSG00000248690.2	HAS2-AS1	lncRNA_divergent	0.886457	3.1226	0.00303512	0.0467339
ENSG00000258666.1	RP11-638I2.8	lncRNA_antisense	0.887837	3.21194	0.00235542	0.0389216
CATG00000041240.1	CATG00000041240.1	lncRNA_antisense	0.888214	4.18505	0.00012076	0.00376122
ENSG00000253806.1	CTD-2292P10.2	lncRNA_divergent	0.888968	4.15601	0.00013258	0.00405016
ENSG00000272288.1	RP11-140K17.3	lncRNA_divergent	0.890353	3.78164	0.000431577	0.0105052
ENSG00000267353.1	CTD-2162K18.3	lncRNA_divergent	0.890857	5.27119	3.18236e-06	0.000189018
ENSG00000227400.2	AC012501.2	lncRNA_intergenic	0.891109	3.40342	0.00135156	0.0253245
ENSG00000249042.1	CTD-2015H6.3	lncRNA_divergent	0.891361	3.22045	0.00229875	0.0380857
ENSG00000232648.3	RP11-367N14.2	lncRNA_divergent	0.89237	3.45608	0.00115688	0.0225486
ENSG00000231566.1	RP5-1158E12.3	lncRNA_intergenic	0.893633	4.39226	6.15941e-05	0.00218895
ENSG00000212766.5	LINC00277	lncRNA_sense_intronic	0.894645	3.1705	0.00265061	0.0424955
CATG00000079165.1	CATG00000079165.1	lncRNA_intergenic	0.895152	3.76665	0.000452024	0.0109239
ENSG00000261071.1	RP1-223E5.4	lncRNA_divergent	0.895912	3.24697	0.00213043	0.0359677
CATG00000071067.1	CATG00000071067.1	lncRNA_intergenic	0.896039	3.1203	0.00305486	0.0468962
ENSG00000247081.3	RP11-318M2.2	lncRNA_divergent	0.89718	3.45865	0.00114808	0.0224126
ENSG00000231976.3	LINC00202-2	lncRNA_intergenic	0.897434	3.40544	0.00134354	0.0252838
CATG00000097258.1	CATG00000097258.1	lncRNA_antisense	0.897815	3.15959	0.00273386	0.0433737
CATG00000041529.1	CATG00000041529.1	lncRNA_divergent	0.897942	3.6788	0.000591876	0.0135414
CATG00000013509.1	CATG00000013509.1	lncRNA_intergenic	0.898196	3.1428	0.00286698	0.0448093
ENSG00000261738.2	RP11-945C19.1	lncRNA_intergenic	0.898196	3.62985	0.00068693	0.0151004
ENSG00000237250.3	RP11-193H5.1	lncRNA_intergenic	0.900613	3.22343	0.00227926	0.0378509
ENSG00000224122.1	POU6F2-AS1	lncRNA_antisense	0.901123	3.30246	0.00181511	0.0318025
ENSG00000226622.1	AC092155.4	lncRNA_intergenic	0.901505	3.57324	0.000815133	0.0170905
ENSG00000243510.2	RN7SL111P	lncRNA_divergent	0.902654	3.12856	0.00298452	0.0461844
CATG00000068303.1	CATG00000068303.1	lncRNA_intergenic	0.903676	3.64062	0.000664838	0.0147531
ENSG00000224307.1	RP11-344B5.2	lncRNA_intergenic	0.904187	4.13071	0.000143788	0.00434893
CATG00000039741.1	CATG00000039741.1	lncRNA_intergenic	0.904187	3.1037	0.00320085	0.048647
ENSG00000253327.2	RAD21-AS1	lncRNA_divergent	0.905467	3.27835	0.00194624	0.0335757
ENSG00000256482.1	RP11-625L16.3	lncRNA_antisense	0.905852	3.27909	0.00194207	0.0335582
ENSG00000255910.1	RP11-405A12.2	lncRNA_intergenic	0.910992	3.3713	0.00148519	0.0273477
ENSG00000253669.3	KB-1732A1.1	lncRNA_intergenic	0.912927	3.17793	0.00259523	0.0418626
ENSG00000273356.1	RP11-804H8.6	lncRNA_intergenic	0.915255	3.57795	0.000803668	0.0169562
ENSG00000258738.1	RP11-73E17.2	lncRNA_divergent	0.917199	3.09149	0.00331233	0.0498088
CATG00000007297.1	CATG00000007297.1	lncRNA_intergenic	0.924101	3.23308	0.00221706	0.036991
CATG00000090013.1	CATG00000090013.1	lncRNA_intergenic	0.926326	3.19845	0.0024479	0.0399973
ENSG00000257057.1	RP11-867G2.2	lncRNA_divergent	0.928294	3.11725	0.00308115	0.0471639
ENSG00000215769.4	hsa-mir-6080	lncRNA_intergenic	0.941252	3.71623	0.000527842	0.0123683
ENSG00000266037.1	RN7SL3	lncRNA_intergenic	0.959671	4.45329	5.04055e-05	0.00184356
ENSG00000268987.1	CTC-435M10.10	lncRNA_sense_intronic	1.03864	-3.37847	0.00145432	0.0269188
ENSG00000243620.1	RP11-649A16.1	lncRNA_intergenic	1.05747	-4.58425	3.2683e-05	0.00128842
CATG00000088944.1	CATG00000088944.1	lncRNA_intergenic	1.06001	-3.88201	0.00031594	0.00822563
CATG00000026651.1	CATG00000026651.1	lncRNA_divergent	1.06166	-3.26607	0.00201643	0.0345907
CATG00000075363.1	CATG00000075363.1	lncRNA_intergenic	1.06467	-4.15456	0.000133201	0.00405777
ENSG00000231557.1	AC018717.1	lncRNA_intergenic	1.06482	-3.10109	0.00322431	0.0488058
ENSG00000250155.1	CTD-2353F22.1	lncRNA_intergenic	1.06482	-3.29371	0.00186168	0.0324583
ENSG00000254003.1	CTB-167B5.1	lncRNA_divergent	1.06482	-3.09386	0.00329039	0.0495838
CATG00000093936.1	CATG00000093936.1	lncRNA_intergenic	1.06542	-3.61293	0.000723077	0.015765
ENSG00000228027.1	RP1-251M9.3	lncRNA_antisense	1.07223	-3.15303	0.0027852	0.044057
CATG00000056339.1	CATG00000056339.1	lncRNA_intergenic	1.0739	-3.14271	0.00286766	0.0448093
CATG00000015154.1	CATG00000015154.1	lncRNA_intergenic	1.07542	-3.3375	0.00163932	0.0294145
CATG00000031874.1	CATG00000031874.1	lncRNA_antisense	1.07618	-3.26674	0.00201255	0.034552
CATG00000105639.1	CATG00000105639.1	lncRNA_intergenic	1.07801	-3.20993	0.00236899	0.039007
ENSG00000251200.1	RP11-6E9.5	lncRNA_intergenic	1.07801	-3.21053	0.00236493	0.0389703
CATG00000075534.1	CATG00000075534.1	lncRNA_divergent	1.07862	-3.54877	0.000877379	0.0182165
ENSG00000248367.1	CTB-129O4.1	lncRNA_divergent	1.0803	-3.17982	0.00258134	0.0416984
CATG00000110218.1	CATG00000110218.1	lncRNA_intergenic	1.08091	-3.69088	0.000570428	0.0131352
CATG00000075024.1	CATG00000075024.1	lncRNA_intergenic	1.08167	-3.77758	0.000437024	0.0106135
ENSG00000254148.3	RP11-84E24.2	lncRNA_sense_intronic	1.08183	-3.3594	0.0015378	0.0281477
CATG00000006516.1	CATG00000006516.1	lncRNA_divergent	1.0832	-3.18398	0.00255094	0.0413641
ENSG00000229105.1	RP11-264C15.2	lncRNA_antisense	1.08351	-3.28611	0.00190308	0.0330182
ENSG00000229807.5	XIST	lncRNA_intergenic	1.0852	-3.81976	0.000383526	0.00957948
ENSG00000256684.1	RP11-49K4.2	lncRNA_intergenic	1.08551	-3.27337	0.00197442	0.0340069
CATG00000040754.1	CATG00000040754.1	lncRNA_divergent	1.08581	-3.16408	0.00269929	0.0430172
CATG00000015615.1	CATG00000015615.1	lncRNA_intergenic	1.09028	-3.29663	0.00184603	0.0322118
CATG00000028222.1	CATG00000028222.1	lncRNA_intergenic	1.09058	-3.19969	0.00243927	0.0398869
CATG00000066944.1	CATG00000066944.1	lncRNA_intergenic	1.09105	-3.68807	0.000575347	0.0132342
CATG00000026538.1	CATG00000026538.1	lncRNA_intergenic	1.09151	-3.18729	0.00252703	0.0411199
CATG00000057623.1	CATG00000057623.1	lncRNA_antisense	1.09182	-3.12085	0.00305013	0.0468911
ENSG00000225342.1	AC079630.4	lncRNA_divergent	1.09182	-3.48891	0.00104934	0.0211285
CATG00000020893.1	CATG00000020893.1	lncRNA_intergenic	1.09197	-3.86637	0.000331757	0.00853324
ENSG00000222035.2	AC079354.3	lncRNA_antisense	1.09197	-3.1809	0.00257339	0.0416572
ENSG00000239589.1	LINC00879	lncRNA_divergent	1.09275	-3.14262	0.00286844	0.0448093
ENSG00000269888.1	RP11-3P17.5	lncRNA_divergent	1.09275	-3.68643	0.000578245	0.0132723
ENSG00000238164.2	RP3-395M20.8	lncRNA_divergent	1.09275	-3.85782	0.000340717	0.00873211
ENSG00000257259.1	RP11-767I20.1	lncRNA_antisense	1.09275	-3.38096	0.00144373	0.026746
ENSG00000185433.4	LINC00158	lncRNA_intergenic	1.09414	-3.40099	0.00136124	0.0254612
ENSG00000235652.3	RP11-545I5.3	lncRNA_divergent	1.09429	-4.42327	5.56354e-05	0.00200053
CATG00000060785.1	CATG00000060785.1	lncRNA_intergenic	1.09522	-3.97588	0.000235277	0.00650689
CATG00000091577.1	CATG00000091577.1	lncRNA_intergenic	1.096	-3.11401	0.00310939	0.0474488
ENSG00000263182.1	RP11-504P24.6	lncRNA_intergenic	1.09646	-3.42725	0.00125986	0.0240716
CATG00000017401.1	CATG00000017401.1	lncRNA_intergenic	1.09693	-3.6469	0.000652279	0.0145487
CATG00000106881.1	CATG00000106881.1	lncRNA_antisense	1.09693	-3.12855	0.00298467	0.0461844
CATG00000018362.1	CATG00000018362.1	lncRNA_divergent	1.09879	-3.43626	0.00122678	0.0236089
CATG00000049145.1	CATG00000049145.1	lncRNA_antisense	1.1005	-3.20314	0.00241538	0.0395874
CATG00000117496.1	CATG00000117496.1	lncRNA_antisense	1.10191	-3.2134	0.00234559	0.0388316
ENSG00000266905.1	RP11-1058N17.1	lncRNA_intergenic	1.10206	-3.16422	0.00269824	0.0430172
CATG00000074088.1	CATG00000074088.1	lncRNA_intergenic	1.10222	-3.3813	0.00144228	0.0267424
ENSG00000229855.4	CTC-546K23.1	lncRNA_intergenic	1.10222	-3.14982	0.00281059	0.0442616
CATG00000116987.1	CATG00000116987.1	lncRNA_divergent	1.10471	-3.30196	0.00181772	0.031822
ENSG00000250903.4	GMDS-AS1	lncRNA_divergent	1.10503	-3.67962	0.00059039	0.0135219
ENSG00000229240.3	LINC00710	lncRNA_intergenic	1.1055	-3.11384	0.00311089	0.0474488
CATG00000056060.1	CATG00000056060.1	lncRNA_intergenic	1.10597	-3.17186	0.00264035	0.0423628
ENSG00000267667.1	RP11-136H19.1	lncRNA_antisense	1.10597	-3.67648	0.000596081	0.0136084
CATG00000095581.1	CATG00000095581.1	lncRNA_intergenic	1.10753	-3.24609	0.00213578	0.0360294
ENSG00000228174.3	RP11-244N9.6	lncRNA_antisense	1.10753	-3.20528	0.00240067	0.0393765
CATG00000083378.1	CATG00000083378.1	lncRNA_intergenic	1.10784	-3.26382	0.00202955	0.0347321
CATG00000050375.1	CATG00000050375.1	lncRNA_intergenic	1.10894	-3.30495	0.00180202	0.0316251
ENSG00000224616.1	RP11-305E17.6	lncRNA_divergent	1.10941	-3.25641	0.00207333	0.0353393
ENSG00000248309.1	MEF2C-AS1	lncRNA_divergent	1.11098	-4.90093	1.12876e-05	0.000537827
ENSG00000238324.1	RN7SKP198	lncRNA_antisense	1.11098	-3.1841	0.00255009	0.0413641
CATG00000006805.1	CATG00000006805.1	lncRNA_intergenic	1.11098	-3.31284	0.00176126	0.0310309
ENSG00000243305.1	RP11-362A9.3	lncRNA_intergenic	1.11145	-3.15873	0.00274057	0.0434155
ENSG00000253125.1	RP11-459E5.1	lncRNA_antisense	1.11145	-3.60661	0.000737033	0.0159551
CATG00000007499.1	CATG00000007499.1	lncRNA_intergenic	1.11208	-3.12589	0.00300707	0.0463964
ENSG00000228592.1	AP000459.4	lncRNA_intergenic	1.11208	-3.65255	0.00064117	0.0143761
CATG00000060759.1	CATG00000060759.1	lncRNA_intergenic	1.11224	-3.27087	0.00198872	0.0341979
ENSG00000215068.3	AC025171.1	lncRNA_intergenic	1.1124	-3.31902	0.0017299	0.0306878
CATG00000094421.1	CATG00000094421.1	lncRNA_antisense	1.1124	-3.91118	0.000288374	0.00768625
CATG00000014104.1	CATG00000014104.1	lncRNA_intergenic	1.11271	-3.48684	0.00105585	0.0212022
ENSG00000229619.3	MBNL1-AS1	lncRNA_divergent	1.11287	-4.08238	0.000167812	0.00497672
CATG00000037869.1	CATG00000037869.1	lncRNA_intergenic	1.11334	-3.80509	0.000401382	0.00996353
CATG00000065973.1	CATG00000065973.1	lncRNA_antisense	1.11334	-3.37251	0.00147995	0.0272749
CATG00000045351.1	CATG00000045351.1	lncRNA_antisense	1.1135	-4.55487	3.60323e-05	0.00138936
CATG00000106022.1	CATG00000106022.1	lncRNA_intergenic	1.11366	-3.74524	0.000482848	0.0114525
ENSG00000250131.1	RP11-130F10.1	lncRNA_divergent	1.11366	-3.46436	0.0011288	0.0221023
CATG00000034370.1	CATG00000034370.1	lncRNA_intergenic	1.11397	-4.06325	0.000178361	0.00521701
CATG00000094161.1	CATG00000094161.1	lncRNA_antisense	1.11429	-3.51949	0.00095783	0.0194884
ENSG00000186615.6	KTN1-AS1	lncRNA_divergent	1.11476	-3.09503	0.00327962	0.0494565
CATG00000055396.1	CATG00000055396.1	lncRNA_divergent	1.11602	-3.25194	0.00210018	0.0355979
ENSG00000255008.2	AP000442.4	lncRNA_intergenic	1.11618	-3.3227	0.0017115	0.0304373
ENSG00000234899.5	AC005152.2	lncRNA_divergent	1.11666	-3.56144	0.000844616	0.0176393
ENSG00000258302.1	RP11-981P6.1	lncRNA_divergent	1.11666	-3.25505	0.00208149	0.0353654
CATG00000000828.1	CATG00000000828.1	lncRNA_intergenic	1.11681	-3.33034	0.00167386	0.0298926
ENSG00000273026.1	RP11-422P24.10	lncRNA_divergent	1.11697	-3.21151	0.00235833	0.0389216
CATG00000035920.1	CATG00000035920.1	lncRNA_intergenic	1.11745	-3.09596	0.00327113	0.0493633
CATG00000082264.1	CATG00000082264.1	lncRNA_divergent	1.11776	-3.12929	0.0029784	0.0461844
CATG00000013738.1	CATG00000013738.1	lncRNA_divergent	1.11792	-4.7613	1.80838e-05	0.000796695
CATG00000075191.1	CATG00000075191.1	lncRNA_sense_intronic	1.11824	-3.85273	0.000346164	0.00883984
ENSG00000267122.1	AC004490.1	lncRNA_antisense	1.11855	-3.6253	0.000696475	0.015263
ENSG00000228436.2	RP5-864K19.4	lncRNA_divergent	1.11871	-4.24511	9.94728e-05	0.0032186
ENSG00000245910.4	SNHG6	lncRNA_intergenic	1.11982	-3.30274	0.00181364	0.0318025
ENSG00000237243.1	AC022173.2	lncRNA_antisense	1.12045	-3.4788	0.00108141	0.0215315
ENSG00000250159.2	RP11-381K20.2	lncRNA_divergent	1.12045	-3.95131	0.000254219	0.00694704
ENSG00000255814.1	RP11-357K6.2	lncRNA_intergenic	1.12109	-3.74836	0.000478226	0.0113555
ENSG00000083622.8	AC000111.6	lncRNA_antisense	1.12172	-3.79454	0.000414708	0.0101993
CATG00000065311.1	CATG00000065311.1	lncRNA_intergenic	1.12283	-3.39362	0.00139104	0.025973
ENSG00000234134.1	RP11-383C5.5	lncRNA_divergent	1.12363	-3.32284	0.0017108	0.0304373
ENSG00000273319.1	RP11-138A9.2	lncRNA_intergenic	1.12426	-4.16318	0.000129559	0.00397795
CATG00000088174.1	CATG00000088174.1	lncRNA_intergenic	1.12426	-4.04576	0.000188568	0.00546308
CATG00000113233.1	CATG00000113233.1	lncRNA_antisense	1.12442	-3.80752	0.000398368	0.00990023
CATG00000091698.1	CATG00000091698.1	lncRNA_intergenic	1.1249	-3.52738	0.00093549	0.0191253
ENSG00000259639.1	RP11-184D12.1	lncRNA_intergenic	1.12506	-3.57662	0.000806876	0.0169842
ENSG00000224597.5	PTCHD3P1	lncRNA_intergenic	1.12522	-3.69184	0.000568762	0.0131252
ENSG00000228791.3	THRB-AS1	lncRNA_divergent	1.12522	-3.18681	0.00253045	0.0411255
ENSG00000232855.2	AF131217.1	lncRNA_intergenic	1.12538	-4.24132	0.0001007	0.00324846
CATG00000083333.1	CATG00000083333.1	lncRNA_sense_intronic	1.12554	-4.20166	0.000114466	0.00361058
ENSG00000254319.1	RP11-134O21.1	lncRNA_intergenic	1.12554	-4.50495	4.25077e-05	0.00160266
ENSG00000256560.1	RP11-256L11.1	lncRNA_intergenic	1.12554	-3.24103	0.00216711	0.0364139
CATG00000112696.1	CATG00000112696.1	lncRNA_sense_intronic	1.1257	-3.10523	0.00318705	0.0484718
ENSG00000230590.3	FTX	lncRNA_intergenic	1.12585	-4.3395	7.31925e-05	0.00249709
ENSG00000223891.1	OSER1-AS1	lncRNA_divergent	1.12649	-3.41109	0.00132135	0.0249338
CATG00000017142.1	CATG00000017142.1	lncRNA_antisense	1.12681	-3.31992	0.0017254	0.0306334
CATG00000051235.1	CATG00000051235.1	lncRNA_antisense	1.12729	-3.9067	0.000292454	0.00774659
ENSG00000271816.1	RP11-574K11.28	lncRNA_divergent	1.12729	-4.96574	9.05871e-06	0.000446095
CATG00000048536.1	CATG00000048536.1	lncRNA_divergent	1.12761	-3.14492	0.00284983	0.0447474
ENSG00000232006.4	AC005537.2	lncRNA_intergenic	1.12809	-4.08679	0.00016547	0.0049141
ENSG00000235437.3	RP11-357C3.3	lncRNA_intergenic	1.12841	-4.93038	1.02146e-05	0.000492774
CATG00000091628.1	CATG00000091628.1	lncRNA_divergent	1.12888	-3.37757	0.00145813	0.0269426
CATG00000000025.1	CATG00000000025.1	lncRNA_divergent	1.12888	-3.22096	0.0022954	0.0380598
ENSG00000232828.1	AF196970.3	lncRNA_intergenic	1.1292	-3.13048	0.00296845	0.0461007
ENSG00000233016.2	SNHG7	lncRNA_divergent	1.12936	-3.31582	0.00174606	0.0308972
CATG00000003974.1	CATG00000003974.1	lncRNA_intergenic	1.12952	-3.35064	0.0015777	0.0287042
ENSG00000236830.2	CBR3-AS1	lncRNA_divergent	1.13048	-3.33502	0.00165123	0.0295626
CATG00000048679.1	CATG00000048679.1	lncRNA_intergenic	1.13096	-3.50812	0.00099094	0.0200663
CATG00000116482.1	CATG00000116482.1	lncRNA_antisense	1.13096	-3.20702	0.00238879	0.0393026
CATG00000099221.1	CATG00000099221.1	lncRNA_intergenic	1.13096	-3.52271	0.000948654	0.0193386
ENSG00000231485.1	RP4-535B20.1	lncRNA_intergenic	1.13176	-3.32306	0.00170971	0.0304373
CATG00000060161.1	CATG00000060161.1	lncRNA_antisense	1.13176	-3.3984	0.00137164	0.0256332
ENSG00000236943.2	RP11-640M9.1	lncRNA_intergenic	1.13288	-3.80142	0.000405964	0.0100306
ENSG00000267374.1	LINC00669	lncRNA_intergenic	1.13369	-3.47439	0.00109568	0.0217535
ENSG00000203801.4	LINC00222	lncRNA_intergenic	1.13433	-3.46826	0.0011158	0.0219892
ENSG00000183308.6	AC005037.3	lncRNA_divergent	1.13433	-3.1286	0.00298422	0.0461844
CATG00000046834.1	CATG00000046834.1	lncRNA_divergent	1.13449	-3.26454	0.00202535	0.0347159
ENSG00000244701.1	RP5-894A10.2	lncRNA_sense_intronic	1.13449	-3.19238	0.00249068	0.0405721
ENSG00000248508.2	SRP14-AS1	lncRNA_divergent	1.13465	-3.6403	0.000665481	0.0147531
CATG00000037762.1	CATG00000037762.1	lncRNA_sense_intronic	1.13513	-3.55282	0.000866782	0.0180492
ENSG00000225470.2	JPX	lncRNA_intergenic	1.13529	-3.65904	0.00062863	0.0141545
ENSG00000273247.1	RP11-83A24.2	lncRNA_divergent	1.13609	-3.55224	0.000868291	0.018063
ENSG00000272667.1	RP11-395A13.2	lncRNA_divergent	1.13625	-3.40403	0.00134911	0.0253199
ENSG00000224905.2	AP001347.6	lncRNA_intergenic	1.13722	-3.43198	0.00124239	0.0238448
ENSG00000261650.1	RP11-474D1.4	lncRNA_intergenic	1.1377	-3.52028	0.000955564	0.0194608
ENSG00000249199.1	CTD-2139B15.5	lncRNA_intergenic	1.13786	-3.08995	0.00332667	0.0499539
CATG00000049158.1	CATG00000049158.1	lncRNA_intergenic	1.13883	-3.58721	0.000781539	0.0166828
ENSG00000233137.2	RP11-220I1.1	lncRNA_intergenic	1.13963	-3.55343	0.00086519	0.0180337
ENSG00000249484.4	AC091969.1	lncRNA_intergenic	1.13963	-3.69138	0.000569568	0.0131296
ENSG00000262454.1	RP11-65J21.3	lncRNA_intergenic	1.14012	-4.17138	0.000126189	0.00389397
ENSG00000253745.1	RP11-350F16.1	lncRNA_intergenic	1.14044	-3.42349	0.00127394	0.0242627
ENSG00000260260.1	RP11-304L19.5	lncRNA_divergent	1.14044	-3.64698	0.000652119	0.0145487
CATG00000051550.1	CATG00000051550.1	lncRNA_divergent	1.14125	-3.49147	0.00104138	0.0209881
CATG00000010376.1	CATG00000010376.1	lncRNA_antisense	1.14157	-3.26184	0.00204117	0.0349028
CATG00000002974.1	CATG00000002974.1	lncRNA_intergenic	1.14173	-3.43141	0.00124449	0.0238636
ENSG00000177757.1	FAM87B	lncRNA_intergenic	1.14206	-4.13717	0.000140844	0.004272
CATG00000022775.1	CATG00000022775.1	lncRNA_divergent	1.14206	-3.1265	0.00300191	0.0463838
ENSG00000273344.1	PAXIP1-AS1	lncRNA_divergent	1.14286	-3.36	0.00153513	0.0281458
ENSG00000263327.2	TAPT1-AS1	lncRNA_divergent	1.14303	-4.24684	9.89173e-05	0.00320549
ENSG00000244879.3	GABPB1-AS1	lncRNA_divergent	1.14351	-3.45288	0.00116788	0.02268
ENSG00000223797.1	ENTPD3-AS1	lncRNA_intergenic	1.14367	-3.90929	0.000290091	0.00770312
ENSG00000257698.1	RP11-620J15.3	lncRNA_divergent	1.14416	-3.44024	0.00121243	0.0234385
ENSG00000261399.1	LA16c-329F2.1	lncRNA_antisense	1.14416	-4.03417	0.000195635	0.005622
CATG00000064532.1	CATG00000064532.1	lncRNA_sense_intronic	1.14448	-3.31065	0.00177249	0.0311838
ENSG00000248275.1	TRIM52-AS1	lncRNA_divergent	1.14464	-3.34657	0.00159653	0.0289234
CATG00000008347.1	CATG00000008347.1	lncRNA_intergenic	1.14464	-3.16116	0.00272172	0.0432776
ENSG00000224228.2	RP1-15D23.2	lncRNA_intergenic	1.14481	-4.16256	0.00012982	0.00397795
ENSG00000163597.10	SNHG16	lncRNA_divergent	1.14481	-3.5616	0.000844198	0.0176393
ENSG00000226752.3	PSMD5-AS1	lncRNA_divergent	1.14513	-3.70567	0.000545197	0.0127052
ENSG00000249436.1	CTD-2023N9.3	lncRNA_intergenic	1.14545	-3.11783	0.00307617	0.0471554
ENSG00000203875.6	SNHG5	lncRNA_intergenic	1.14626	-3.95311	0.000252788	0.00692827
ENSG00000254862.1	RP11-159H22.2	lncRNA_divergent	1.14626	-3.58105	0.00079619	0.0168927
ENSG00000231365.1	RP11-418J17.1	lncRNA_divergent	1.14626	-3.41771	0.00129585	0.0245527
ENSG00000235257.4	AC093415.2	lncRNA_divergent	1.14643	-3.78853	0.000422484	0.0103428
ENSG00000254855.1	RP11-867G23.1	lncRNA_divergent	1.14659	-3.40378	0.00135013	0.0253199
CATG00000092610.1	CATG00000092610.1	lncRNA_intergenic	1.14659	-3.48679	0.00105598	0.0212022
CATG00000039997.1	CATG00000039997.1	lncRNA_divergent	1.14675	-3.21069	0.00236387	0.0389703
ENSG00000253967.1	RP11-333A23.4	lncRNA_intergenic	1.14707	-3.63839	0.000669369	0.0147906
CATG00000052818.1	CATG00000052818.1	lncRNA_antisense	1.14707	-3.12041	0.00305391	0.0468962
ENSG00000253434.1	RP11-1101K5.1	lncRNA_intergenic	1.14724	-5.38744	2.12966e-06	0.000136369
CATG00000022372.1	CATG00000022372.1	lncRNA_antisense	1.14756	-3.69231	0.000567946	0.0131206
ENSG00000260803.1	Z84812.4	lncRNA_intergenic	1.14772	-5.23492	3.60589e-06	0.000211232
ENSG00000267528.1	AC011524.1	lncRNA_intergenic	1.14821	-3.1486	0.00282028	0.0443814
ENSG00000228223.1	HCG11	lncRNA_intergenic	1.14886	-3.80433	0.000402327	0.00997536
ENSG00000196972.6	LINC00087	lncRNA_intergenic	1.14886	-3.71664	0.00052718	0.0123664
ENSG00000232098.2	CTD-2619J13.14	lncRNA_divergent	1.14902	-3.64805	0.000650007	0.0145284
ENSG00000273061.1	RP11-6J24.6	lncRNA_divergent	1.14902	-3.54097	0.00089817	0.0184506
CATG00000096681.1	CATG00000096681.1	lncRNA_divergent	1.15016	-4.04606	0.000188387	0.00546308
ENSG00000197291.4	RAMP2-AS1	lncRNA_divergent	1.15032	-4.74815	1.89003e-05	0.000825842
ENSG00000260687.1	RP11-44L9.2	lncRNA_antisense	1.15098	-3.42397	0.00127214	0.0242627
CATG00000105091.1	CATG00000105091.1	lncRNA_divergent	1.1513	-3.54372	0.000890771	0.0183871
CATG00000051288.1	CATG00000051288.1	lncRNA_divergent	1.15146	-3.76289	0.000457301	0.0110306
CATG00000063436.1	CATG00000063436.1	lncRNA_divergent	1.15163	-3.25276	0.00209526	0.0355427
ENSG00000242242.1	PVRL3-AS1	lncRNA_intergenic	1.15195	-3.14368	0.00285984	0.0448093
ENSG00000247735.2	CTD-2574D22.2	lncRNA_divergent	1.15195	-3.79126	0.00041893	0.0102913
ENSG00000251396.2	RP11-163N6.2	lncRNA_divergent	1.15212	-3.19718	0.00245682	0.0401124
ENSG00000248092.3	NNT-AS1	lncRNA_divergent	1.15244	-3.69602	0.000561531	0.0130147
ENSG00000248265.1	RP11-834C11.3	lncRNA_intergenic	1.15244	-3.81965	0.000383664	0.00957948
CATG00000016234.1	CATG00000016234.1	lncRNA_intergenic	1.1526	-3.30157	0.00181978	0.0318249
CATG00000042883.1	CATG00000042883.1	lncRNA_intergenic	1.15277	-3.86861	0.000329448	0.00848409
ENSG00000228393.3	LINC01004	lncRNA_divergent	1.15309	-3.6929	0.000566928	0.013117
ENSG00000267082.1	CTC-510F12.2	lncRNA_divergent	1.15326	-4.69802	2.23612e-05	0.000953617
ENSG00000224505.2	AC002117.1	lncRNA_divergent	1.15391	-4.68522	2.33393e-05	0.000989393
CATG00000007614.1	CATG00000007614.1	lncRNA_intergenic	1.15407	-3.47237	0.00110228	0.0218267
ENSG00000248019.2	FAM13A-AS1	lncRNA_intergenic	1.15424	-3.84613	0.000353349	0.00898029
ENSG00000234161.1	PABPC5-AS1	lncRNA_divergent	1.1544	-3.60455	0.000741651	0.0160289
ENSG00000257337.2	RP11-983P16.4	lncRNA_divergent	1.15538	-3.16185	0.00271648	0.0432476
ENSG00000244055.1	AC007566.10	lncRNA_intergenic	1.15571	-4.04779	0.000187353	0.00544269
CATG00000034109.1	CATG00000034109.1	lncRNA_divergent	1.15603	-3.2252	0.00226772	0.0377475
CATG00000035050.1	CATG00000035050.1	lncRNA_antisense	1.15652	-3.17535	0.00261429	0.0421108
ENSG00000235834.1	RP1-60N8.1	lncRNA_sense_intronic	1.15669	-3.43948	0.00121515	0.0234697
ENSG00000258337.1	RP11-115H15.2	lncRNA_sense_intronic	1.15702	-3.39123	0.00140088	0.0261338
ENSG00000271555.1	CTD-3214K23.1	lncRNA_divergent	1.15734	-3.15467	0.00277224	0.0438845
CATG00000105464.1	CATG00000105464.1	lncRNA_intergenic	1.15734	-3.70374	0.000548423	0.0127525
CATG00000113275.1	CATG00000113275.1	lncRNA_divergent	1.15783	-5.76126	5.79381e-07	4.4122e-05
ENSG00000224218.1	RP11-359D14.3	lncRNA_antisense	1.15816	-3.75258	0.000472051	0.0112339
CATG00000116240.1	CATG00000116240.1	lncRNA_divergent	1.15816	-3.38555	0.0014244	0.0265031
ENSG00000230790.2	AC012456.4	lncRNA_divergent	1.15849	-3.23904	0.00217952	0.0365778
CATG00000009146.1	CATG00000009146.1	lncRNA_divergent	1.15882	-3.77647	0.000438525	0.0106371
ENSG00000258026.1	RP11-543H12.1	lncRNA_antisense	1.15882	-4.29231	8.53492e-05	0.00283474
ENSG00000259065.1	RP5-1021I20.1	lncRNA_divergent	1.15997	-4.27503	9.02776e-05	0.00296152
ENSG00000214772.2	RP11-174G6.1	lncRNA_intergenic	1.16062	-3.14104	0.00288128	0.0448777
CATG00000074739.1	CATG00000074739.1	lncRNA_intergenic	1.16079	-3.59891	0.000754395	0.0161994
ENSG00000234235.1	BOK-AS1	lncRNA_divergent	1.16095	-3.10161	0.00321965	0.0488057
ENSG00000231453.1	AC018470.4	lncRNA_intergenic	1.16111	-3.57382	0.000813729	0.0170784
ENSG00000261305.1	RP4-584D14.7	lncRNA_divergent	1.16144	-3.20279	0.00241782	0.0395969
ENSG00000223727.2	AC026188.1	lncRNA_intergenic	1.16194	-5.18938	4.21717e-06	0.000241727
CATG00000064954.1	CATG00000064954.1	lncRNA_sense_intronic	1.1621	-3.36409	0.00151687	0.027859
ENSG00000272688.1	RP13-270P17.3	lncRNA_divergent	1.16226	-3.66755	0.000612535	0.0138653
CATG00000039804.1	CATG00000039804.1	lncRNA_intergenic	1.16342	-3.48314	0.00106754	0.021394
CATG00000062000.1	CATG00000062000.1	lncRNA_antisense	1.16342	-3.25698	0.00206997	0.0353104
ENSG00000259768.3	RP5-991G20.1	lncRNA_intergenic	1.16407	-3.12716	0.00299635	0.0463315
CATG00000089707.1	CATG00000089707.1	lncRNA_divergent	1.1649	-3.8904	0.000307767	0.00805217
ENSG00000174365.15	SNHG11	lncRNA_intergenic	1.16523	-4.97613	8.744e-06	0.00043418
CATG00000084832.1	CATG00000084832.1	lncRNA_antisense	1.16589	-4.20219	0.000114269	0.00361058
CATG00000049695.1	CATG00000049695.1	lncRNA_intergenic	1.16589	-3.90244	0.000296387	0.00779268
ENSG00000271646.1	RP11-326I11.3	lncRNA_divergent	1.16655	-3.45096	0.00117454	0.0227887
CATG00000111066.1	CATG00000111066.1	lncRNA_sense_intronic	1.16721	-5.14832	4.85562e-06	0.000273183
CATG00000094547.1	CATG00000094547.1	lncRNA_antisense	1.16737	-3.57381	0.000813753	0.0170784
ENSG00000271252.1	RP11-286B14.2	lncRNA_sense_intronic	1.1677	-3.93791	0.000265169	0.00713014
ENSG00000272734.1	ADIRF-AS1	lncRNA_sense_intronic	1.1677	-4.55326	3.62253e-05	0.0013942
ENSG00000228506.1	RP11-98I9.4	lncRNA_divergent	1.16803	-3.78717	0.000424268	0.0103746
ENSG00000247556.2	OIP5-AS1	lncRNA_sense_intronic	1.16853	-4.38806	6.24467e-05	0.00219999
ENSG00000272572.1	RP11-179B2.2	lncRNA_divergent	1.16936	-3.4794	0.00107947	0.0215315
ENSG00000237836.1	PHKA2-AS1	lncRNA_antisense	1.17051	-4.02645	0.000200491	0.00572297
ENSG00000261840.1	RP11-146F11.1	lncRNA_divergent	1.17118	-3.75315	0.000471221	0.0112339
ENSG00000257261.1	RP11-96H19.1	lncRNA_sense_intronic	1.17134	-4.20443	0.000113449	0.00359445
ENSG00000227704.1	RP1-266L20.4	lncRNA_divergent	1.17134	-4.55718	3.57575e-05	0.00138126
ENSG00000258603.1	RP3-414A15.10	lncRNA_intergenic	1.17151	-3.69662	0.000560508	0.0130051
ENSG00000248489.1	CTD-2007H13.3	lncRNA_divergent	1.17167	-5.54492	1.2328e-06	8.43438e-05
CATG00000005914.1	CATG00000005914.1	lncRNA_divergent	1.17217	-3.38364	0.00143242	0.0265826
ENSG00000236991.2	RP11-383C5.7	lncRNA_divergent	1.17217	-3.24732	0.0021283	0.0359601
ENSG00000258844.1	RP11-259K15.2	lncRNA_divergent	1.17234	-3.75555	0.000467759	0.0111691
ENSG00000229108.1	AC005550.4	lncRNA_intergenic	1.173	-3.67074	0.0006066	0.0137601
ENSG00000170919.11	TPT1-AS1	lncRNA_divergent	1.17317	-6.51207	4.12118e-08	4.22481e-06
ENSG00000231856.1	RP11-327P2.5	lncRNA_divergent	1.17383	-5.3663	2.29136e-06	0.000144552
ENSG00000235703.1	LINC00894	lncRNA_divergent	1.17383	-6.76817	1.66738e-08	2.03163e-06
CATG00000065641.1	CATG00000065641.1	lncRNA_divergent	1.17416	-4.17209	0.000125903	0.00389076
CATG00000108403.1	CATG00000108403.1	lncRNA_divergent	1.17433	-3.52737	0.000935502	0.0191253
CATG00000064016.1	CATG00000064016.1	lncRNA_divergent	1.1745	-3.47109	0.00110648	0.0218661
ENSG00000177406.4	RP11-218M22.1	lncRNA_divergent	1.17533	-5.20178	4.04134e-06	0.000234167
ENSG00000241316.2	RP11-81N13.1	lncRNA_divergent	1.17549	-4.64283	2.68911e-05	0.00110909
ENSG00000269386.1	RAB11B-AS1	lncRNA_divergent	1.17599	-4.30475	8.19675e-05	0.0027481
ENSG00000244968.2	LIFR-AS1	lncRNA_divergent	1.17682	-3.73115	0.000504214	0.0118407
ENSG00000261744.1	RP11-21B21.4	lncRNA_divergent	1.17682	-4.37744	6.46575e-05	0.00226015
ENSG00000231518.1	RP11-327L3.3	lncRNA_intergenic	1.17749	-4.4152	5.71285e-05	0.00204693
ENSG00000235450.1	RP11-142A5.1	lncRNA_intergenic	1.17799	-4.40187	5.96825e-05	0.00212456
ENSG00000228775.3	WEE2-AS1	lncRNA_divergent	1.17799	-4.02108	0.000203931	0.00578879
ENSG00000214955.5	AP000318.2	lncRNA_sense_intronic	1.17816	-4.24011	0.000101095	0.00325625
ENSG00000253893.2	FAM85B	lncRNA_antisense	1.17882	-6.10637	1.7245e-07	1.48872e-05
ENSG00000237037.5	NDUFA6-AS1	lncRNA_intergenic	1.17932	-3.4698	0.00111071	0.0219091
ENSG00000273258.1	RP11-394I13.3	lncRNA_intergenic	1.17949	-4.18354	0.000121347	0.00377185
CATG00000098604.1	CATG00000098604.1	lncRNA_sense_intronic	1.17949	-3.76667	0.000451996	0.0109239
ENSG00000175611.7	LINC00476	lncRNA_divergent	1.18049	-3.88868	0.000309426	0.00808564
CATG00000013266.1	CATG00000013266.1	lncRNA_divergent	1.18149	-3.24258	0.00215748	0.0363093
ENSG00000234362.1	AC104654.2	lncRNA_intergenic	1.18166	-3.34503	0.00160373	0.0290046
ENSG00000223678.1	RP11-311H10.4	lncRNA_divergent	1.18183	-4.12665	0.000145671	0.00439343
ENSG00000205959.3	RP11-689P11.2	lncRNA_intergenic	1.182	-4.51199	4.15306e-05	0.00157014
ENSG00000231999.2	RP5-1007M22.2	lncRNA_divergent	1.182	-3.75623	0.000466785	0.0111584
ENSG00000227252.1	AC105760.2	lncRNA_divergent	1.18367	-3.44309	0.00120223	0.0232836
CATG00000064271.1	CATG00000064271.1	lncRNA_intergenic	1.18384	-4.67172	2.44174e-05	0.00102741
ENSG00000261889.1	RP11-473M20.16	lncRNA_intergenic	1.18484	-3.3279	0.00168583	0.030056
ENSG00000248266.1	RP11-402C9.1	lncRNA_sense_intronic	1.18501	-4.28861	8.63816e-05	0.00286457
CATG00000045497.1	CATG00000045497.1	lncRNA_sense_intronic	1.18602	-3.63747	0.000671237	0.0148165
ENSG00000261645.1	DISC1FP1	lncRNA_intergenic	1.18719	-4.45873	4.95097e-05	0.00182017
ENSG00000272755.1	RP11-326G21.1	lncRNA_antisense	1.18736	-6.68886	2.20672e-08	2.51625e-06
CATG00000004866.1	CATG00000004866.1	lncRNA_divergent	1.18753	-3.27299	0.00197657	0.0340165
ENSG00000213904.4	LIPE-AS1	lncRNA_divergent	1.1882	-4.02074	0.000204154	0.00578879
ENSG00000236548.1	RP11-510H23.1	lncRNA_divergent	1.1887	-3.99748	0.000219756	0.00612934
ENSG00000253878.1	RP11-347C18.3	lncRNA_divergent	1.18921	-3.64136	0.000663352	0.0147494
ENSG00000237975.2	FLG-AS1	lncRNA_intergenic	1.18954	-3.7842	0.00042818	0.0104344
CATG00000117939.1	CATG00000117939.1	lncRNA_divergent	1.19106	-3.92979	0.000272022	0.00728684
ENSG00000224848.1	RP11-535M15.1	lncRNA_intergenic	1.19123	-3.54278	0.000893283	0.0183904
ENSG00000226009.1	KCNIP2-AS1	lncRNA_divergent	1.1914	-4.45075	5.08288e-05	0.00185586
CATG00000039263.1	CATG00000039263.1	lncRNA_sense_intronic	1.19173	-3.10101	0.00322503	0.0488058
ENSG00000264112.1	RP11-159D12.2	lncRNA_sense_intronic	1.1919	-4.73567	1.97093e-05	0.000854189
ENSG00000201583.1	RN7SKP191	lncRNA_sense_intronic	1.19207	-4.50418	4.26164e-05	0.00160266
ENSG00000253661.1	ZFHX4-AS1	lncRNA_divergent	1.19224	-3.14683	0.00283447	0.0445389
ENSG00000231074.4	HCG18	lncRNA_divergent	1.19241	-4.07139	0.000173796	0.00509747
ENSG00000182648.7	LINC01006	lncRNA_divergent	1.19241	-4.38274	6.35453e-05	0.00223225
CATG00000006051.1	CATG00000006051.1	lncRNA_divergent	1.19342	-4.11075	0.000153277	0.00459681
CATG00000061552.1	CATG00000061552.1	lncRNA_divergent	1.19376	-4.00714	0.000213143	0.00597221
CATG00000110289.1	CATG00000110289.1	lncRNA_intergenic	1.19494	-3.74337	0.000485632	0.0114929
ENSG00000227354.2	RBM26-AS1	lncRNA_divergent	1.19612	-4.22645	0.000105662	0.00339313
CATG00000040070.1	CATG00000040070.1	lncRNA_antisense	1.20002	-3.1223	0.00303772	0.0467339
ENSG00000224660.1	SH3BP5-AS1	lncRNA_antisense	1.20138	-7.18866	3.78007e-09	5.71648e-07
ENSG00000255650.1	FAM222A-AS1	lncRNA_antisense	1.20138	-4.61779	2.92319e-05	0.00118726
CATG00000027252.1	CATG00000027252.1	lncRNA_divergent	1.20274	-3.42613	0.00126405	0.0241301
CATG00000087927.1	CATG00000087927.1	lncRNA_intergenic	1.20359	-4.97996	8.63095e-06	0.000429995
CATG00000048354.1	CATG00000048354.1	lncRNA_sense_intronic	1.20376	-3.16059	0.00272619	0.0433163
ENSG00000267470.1	ZNF571-AS1	lncRNA_sense_intronic	1.20513	-4.2163	0.000109183	0.00347479
CATG00000039933.1	CATG00000039933.1	lncRNA_intergenic	1.20513	-3.96645	0.000242382	0.0066774
ENSG00000226482.1	ADIPOQ-AS1	lncRNA_divergent	1.20734	-5.47517	1.57107e-06	0.000104238
CATG00000077557.1	CATG00000077557.1	lncRNA_divergent	1.20734	-3.60866	0.000732481	0.0158888
ENSG00000255135.3	RP11-111M22.3	lncRNA_divergent	1.20751	-4.63348	2.77432e-05	0.00113763
ENSG00000255864.1	RP11-444D3.1	lncRNA_intergenic	1.20751	-4.63056	2.80139e-05	0.00114433
ENSG00000236204.1	AC092594.1	lncRNA_intergenic	1.2082	-3.90951	0.00028989	0.00770312
CATG00000024015.1	CATG00000024015.1	lncRNA_antisense	1.21008	-6.15473	1.4544e-07	1.28681e-05
ENSG00000272752.1	STAG3L5P-PVRIG2P-PILRB	lncRNA_intergenic	1.21042	-7.46908	1.40932e-09	2.40408e-07
CATG00000110580.1	CATG00000110580.1	lncRNA_divergent	1.21059	-4.73296	1.98893e-05	0.000860243
ENSG00000245849.2	RAD51-AS1	lncRNA_divergent	1.21076	-3.17348	0.00262822	0.0422324
ENSG00000261621.1	RP11-580I1.2	lncRNA_intergenic	1.21196	-4.61429	2.95746e-05	0.00119889
ENSG00000236869.1	RP11-944L7.4	lncRNA_intergenic	1.21231	-4.7458	1.90506e-05	0.000830706
ENSG00000233547.1	RP11-57H14.2	lncRNA_divergent	1.21299	-5.92738	3.23614e-07	2.59533e-05
ENSG00000271151.1	RP11-394I13.2	lncRNA_divergent	1.21351	-3.52618	0.000938846	0.0191753
ENSG00000225877.1	AC004603.4	lncRNA_sense_intronic	1.21402	-4.84822	1.34914e-05	0.000616012
CATG00000105259.1	CATG00000105259.1	lncRNA_divergent	1.21471	-4.07332	0.00017273	0.00508017
CATG00000072228.1	CATG00000072228.1	lncRNA_intergenic	1.21712	-3.58575	0.000784986	0.0167166
CATG00000092668.1	CATG00000092668.1	lncRNA_sense_intronic	1.2185	-4.63425	2.76713e-05	0.00113687
ENSG00000263171.1	RP11-542C16.1	lncRNA_divergent	1.21867	-3.34736	0.00159289	0.0288819
ENSG00000267322.1	SCARNA17	lncRNA_divergent	1.21936	-5.72831	6.50158e-07	4.81365e-05
CATG00000042543.1	CATG00000042543.1	lncRNA_divergent	1.21936	-3.67168	0.000604873	0.0137356
CATG00000058332.1	CATG00000058332.1	lncRNA_antisense	1.22005	-3.5474	0.000880986	0.0182381
ENSG00000260912.1	RP11-363E7.4	lncRNA_intergenic	1.22057	-4.08005	0.000169065	0.0050069
ENSG00000230058.1	RP11-172E9.2	lncRNA_intergenic	1.22108	-3.47125	0.00110595	0.0218661
ENSG00000264868.1	CTB-167B5.2	lncRNA_intergenic	1.22195	-3.63117	0.000684199	0.0150559
CATG00000067247.1	CATG00000067247.1	lncRNA_divergent	1.22195	-3.33189	0.00166635	0.0298067
CATG00000001906.1	CATG00000001906.1	lncRNA_intergenic	1.22264	-5.19468	4.1411e-06	0.000239297
ENSG00000270066.2	SCARNA2	lncRNA_intergenic	1.22299	-5.4721	1.5879e-06	0.000104623
ENSG00000249249.1	AC010226.4	lncRNA_divergent	1.22333	-3.84466	0.000354974	0.00900014
CATG00000104362.1	CATG00000104362.1	lncRNA_divergent	1.2242	-4.58646	3.24437e-05	0.00128348
CATG00000061599.1	CATG00000061599.1	lncRNA_intergenic	1.22576	-3.79865	0.000409465	0.0100937
ENSG00000230333.2	AC004538.3	lncRNA_intergenic	1.2261	-5.27818	3.10653e-06	0.000186593
ENSG00000227627.1	RP1-101K10.6	lncRNA_divergent	1.22697	-4.03542	0.000194864	0.00560741
CATG00000082627.1	CATG00000082627.1	lncRNA_divergent	1.22749	-4.18043	0.000122567	0.00380421
ENSG00000177853.10	ZNF518A	lncRNA_intergenic	1.22784	-4.72454	2.04591e-05	0.000881313
ENSG00000231134.1	TCF7L1-IT1	lncRNA_sense_intronic	1.22836	-3.84683	0.000352587	0.00897162
ENSG00000232104.2	RP11-509J21.1	lncRNA_divergent	1.22836	-4.78219	1.68565e-05	0.000751948
ENSG00000258451.1	RP11-903H12.3	lncRNA_antisense	1.22975	-4.85954	1.29852e-05	0.000598021
CATG00000049205.1	CATG00000049205.1	lncRNA_divergent	1.2301	-4.49962	4.32626e-05	0.0016241
ENSG00000247572.3	CKMT2-AS1	lncRNA_divergent	1.2301	-6.01424	2.38489e-07	1.99424e-05
ENSG00000230148.4	HOXB-AS1	lncRNA_intergenic	1.23184	-9.1302	4.5663e-12	1.7387e-09
CATG00000086273.1	CATG00000086273.1	lncRNA_intergenic	1.23184	-4.04305	0.000190199	0.00549542
CATG00000032755.1	CATG00000032755.1	lncRNA_sense_intronic	1.23202	-3.83621	0.000364422	0.00916341
CATG00000082410.1	CATG00000082410.1	lncRNA_sense_intronic	1.23219	-5.49339	1.47475e-06	9.95129e-05
ENSG00000240050.1	RP1-93H18.1	lncRNA_divergent	1.23289	-3.60287	0.000745437	0.016088
ENSG00000263934.2	SNORD3A	lncRNA_intergenic	1.23306	-5.85423	4.18322e-07	3.27937e-05
CATG00000081802.1	CATG00000081802.1	lncRNA_sense_intronic	1.23411	-7.11254	4.94351e-09	7.2199e-07
CATG00000080218.1	CATG00000080218.1	lncRNA_divergent	1.23498	-3.81345	0.000391108	0.00974253
ENSG00000255121.2	RP11-110I1.12	lncRNA_divergent	1.23586	-5.13237	5.1286e-06	0.000284784
ENSG00000215039.2	CD27-AS1	lncRNA_divergent	1.23708	-4.43	5.44184e-05	0.00197006
ENSG00000230082.1	PRRT3-AS1	lncRNA_divergent	1.23726	-6.75597	1.74084e-08	2.10405e-06
ENSG00000250220.1	RP11-692D12.1	lncRNA_divergent	1.24234	-7.07386	5.66617e-09	8.05e-07
CATG00000014203.1	CATG00000014203.1	lncRNA_divergent	1.24304	-3.53199	0.00092265	0.018917
CATG00000072514.1	CATG00000072514.1	lncRNA_intergenic	1.24357	-5.10438	5.64452e-06	0.000309404
ENSG00000224078.8	SNHG14	lncRNA_intergenic	1.2441	-6.51681	4.05275e-08	4.17473e-06
ENSG00000243961.2	RP5-839B4.8	lncRNA_sense_intronic	1.2441	-3.42307	0.0012755	0.0242627
CATG00000071352.1	CATG00000071352.1	lncRNA_divergent	1.24428	-4.79393	1.62029e-05	0.000724308
CATG00000066211.1	CATG00000066211.1	lncRNA_sense_intronic	1.24551	-3.4376	0.00122194	0.0235582
ENSG00000258819.1	RP11-7F17.3	lncRNA_sense_intronic	1.24798	-5.30496	2.83235e-06	0.000171575
ENSG00000259347.1	RP11-798K3.2	lncRNA_intergenic	1.24815	-3.98412	0.000229235	0.00635628
CATG00000086486.1	CATG00000086486.1	lncRNA_sense_intronic	1.24868	-4.2848	8.74602e-05	0.00289134
ENSG00000233895.1	RP1-122P22.2	lncRNA_divergent	1.24957	-6.70114	2.113e-08	2.43543e-06
ENSG00000241769.3	LINC00893	lncRNA_divergent	1.24974	-6.52722	3.90648e-08	4.10334e-06
ENSG00000231473.2	LINC00441	lncRNA_divergent	1.2501	-4.12812	0.000144987	0.00437897
ENSG00000227017.1	AC007036.6	lncRNA_sense_intronic	1.25169	-4.28075	8.86172e-05	0.00291602
ENSG00000234884.1	CTA-407F11.8	lncRNA_divergent	1.25559	-5.57449	1.1122e-06	7.8011e-05
ENSG00000240453.1	RP11-206L10.10	lncRNA_intergenic	1.25755	-6.67725	2.29908e-08	2.59383e-06
CATG00000063766.1	CATG00000063766.1	lncRNA_divergent	1.2579	-3.84688	0.000352525	0.00897162
CATG00000002663.1	CATG00000002663.1	lncRNA_sense_intronic	1.26361	-4.64877	2.63628e-05	0.00108941
CATG00000111849.1	CATG00000111849.1	lncRNA_intergenic	1.26361	-5.65778	8.3186e-07	5.99248e-05
ENSG00000243176.1	RP11-550I24.2	lncRNA_antisense	1.26486	-4.47191	4.74057e-05	0.00175492
ENSG00000254109.1	RBPMS-AS1	lncRNA_divergent	1.26594	-5.82932	4.56496e-07	3.5341e-05
ENSG00000231367.1	AC016995.3	lncRNA_intergenic	1.26611	-5.6024	1.00913e-06	7.1487e-05
ENSG00000248787.1	RP11-666A20.4	lncRNA_intergenic	1.26665	-5.42718	1.85571e-06	0.000120272
ENSG00000249846.2	RP11-77P16.4	lncRNA_divergent	1.26701	-4.5328	3.87669e-05	0.00147876
ENSG00000265185.2	SNORD3B-1	lncRNA_intergenic	1.26737	-6.10793	1.71505e-07	1.48659e-05
CATG00000024483.1	CATG00000024483.1	lncRNA_intergenic	1.26773	-7.42504	1.64516e-09	2.69844e-07
CATG00000070588.1	CATG00000070588.1	lncRNA_divergent	1.26791	-3.82361	0.000378972	0.00949568
ENSG00000224032.2	EPB41L4A-AS1	lncRNA_antisense	1.26809	-4.75156	1.86852e-05	0.000819803
CATG00000102573.1	CATG00000102573.1	lncRNA_antisense	1.2715	-5.54461	1.23413e-06	8.43438e-05
ENSG00000261879.1	RP11-333E1.1	lncRNA_divergent	1.27294	-4.27395	9.05959e-05	0.00296285
ENSG00000175061.13	C17orf76-AS1	lncRNA_antisense	1.27402	-9.09089	5.21445e-12	1.88454e-09
ENSG00000254860.1	TMEM9B-AS1	lncRNA_divergent	1.27546	-6.28985	9.03195e-08	8.37341e-06
ENSG00000226251.1	RP11-15I11.3	lncRNA_divergent	1.27618	-3.20633	0.00239351	0.0393195
CATG00000098356.1	CATG00000098356.1	lncRNA_antisense	1.27618	-5.0928	5.8727e-06	0.000317196
ENSG00000232593.2	RP11-258C19.5	lncRNA_intergenic	1.27853	-4.96891	8.96159e-06	0.000442333
ENSG00000234740.1	RP11-272P10.2	lncRNA_sense_intronic	1.27853	-5.36105	2.33333e-06	0.000146151
ENSG00000226419.2	RP11-31F15.1	lncRNA_divergent	1.28234	-5.56491	1.14993e-06	8.01303e-05
ENSG00000259905.1	PWRN1	lncRNA_intergenic	1.28324	-4.33404	7.45065e-05	0.00253381
ENSG00000271430.1	RP3-368A4.5	lncRNA_sense_intronic	1.28324	-6.31972	8.12823e-08	7.67806e-06
ENSG00000245498.2	RP11-677M14.7	lncRNA_divergent	1.2847	-5.1079	5.57696e-06	0.000308077
ENSG00000264940.2	SNORD3C	lncRNA_intergenic	1.28688	-6.57006	3.3578e-08	3.59791e-06
CATG00000094624.1	CATG00000094624.1	lncRNA_antisense	1.28815	-4.56963	3.43092e-05	0.00134054
ENSG00000179523.4	EIF3J-AS1	lncRNA_divergent	1.28907	-6.71127	2.03869e-08	2.36255e-06
ENSG00000246067.3	RAB30-AS1	lncRNA_divergent	1.28943	-6.35874	7.0826e-08	6.83359e-06
CATG00000104458.1	CATG00000104458.1	lncRNA_divergent	1.29071	-4.83555	1.40814e-05	0.000638847
ENSG00000225655.1	RP11-143M1.2	lncRNA_intergenic	1.29437	-7.10347	5.10429e-09	7.404e-07
ENSG00000231711.2	LINC00899	lncRNA_divergent	1.29528	-5.13518	5.07938e-06	0.000282788
ENSG00000257550.1	RP11-793H13.3	lncRNA_antisense	1.29748	-4.99869	8.09763e-06	0.000409161
CATG00000087896.1	CATG00000087896.1	lncRNA_intergenic	1.29858	-3.61766	0.000712791	0.0155726
CATG00000024503.1	CATG00000024503.1	lncRNA_sense_intronic	1.29877	-6.39582	6.21358e-08	6.07763e-06
ENSG00000223779.4	RP11-403I13.4	lncRNA_intergenic	1.2995	-5.02486	7.4068e-06	0.000381486
ENSG00000272690.1	RP11-803B1.8	lncRNA_divergent	1.30282	-6.3537	7.20976e-08	6.87463e-06
ENSG00000243836.1	WDR86-AS1	lncRNA_divergent	1.30429	-6.82803	1.34957e-08	1.67308e-06
ENSG00000250961.1	CTD-2023N9.1	lncRNA_intergenic	1.30503	-6.35486	7.18025e-08	6.87463e-06
ENSG00000245573.3	BDNF-AS	lncRNA_divergent	1.30521	-4.88007	1.21139e-05	0.000570932
ENSG00000213971.3	RP11-15H20.6	lncRNA_sense_intronic	1.30762	-5.93887	3.1082e-07	2.51046e-05
ENSG00000255717.2	SNHG1	lncRNA_divergent	1.30799	-4.94509	9.71697e-06	0.000473048
CATG00000033848.1	CATG00000033848.1	lncRNA_antisense	1.30965	-3.23334	0.00221542	0.036991
CATG00000083346.1	CATG00000083346.1	lncRNA_sense_intronic	1.30984	-5.27678	3.12153e-06	0.000186967
ENSG00000234741.3	GAS5	lncRNA_divergent	1.31373	-5.47462	1.57411e-06	0.000104238
CATG00000023649.1	CATG00000023649.1	lncRNA_sense_intronic	1.31578	-7.2747	2.79178e-09	4.40957e-07
CATG00000077857.1	CATG00000077857.1	lncRNA_antisense	1.31913	-4.89842	1.13839e-05	0.000539957
ENSG00000180769.4	WDFY3-AS2	lncRNA_divergent	1.321	-4.82386	1.4648e-05	0.000658946
ENSG00000223745.3	RP4-717I23.3	lncRNA_divergent	1.32268	-7.44367	1.54092e-09	2.54706e-07
ENSG00000261064.1	RP11-1000B6.3	lncRNA_intergenic	1.32606	-9.22863	3.27768e-12	1.29426e-09
ENSG00000237543.1	RP11-58A12.3	lncRNA_intergenic	1.32681	-6.19158	1.27726e-07	1.14433e-05
ENSG00000248464.1	RP11-473L15.2	lncRNA_divergent	1.32963	-7.03608	6.4739e-09	8.80813e-07
ENSG00000152268.8	SPON1	lncRNA_intergenic	1.33377	-6.51981	4.01002e-08	4.15076e-06
ENSG00000225243.1	RP1-127D3.4	lncRNA_intergenic	1.34305	-6.52188	3.98088e-08	4.1407e-06
ENSG00000206567.5	AC022007.5	lncRNA_sense_intronic	1.3499	-7.08277	5.4908e-09	7.85775e-07
ENSG00000272368.1	RP4-605O3.4	lncRNA_antisense	1.35239	-5.06996	6.3497e-06	0.000335967
ENSG00000261390.1	RP11-345M22.2	lncRNA_intergenic	1.35296	-5.10509	5.63081e-06	0.000309404
CATG00000113247.1	CATG00000113247.1	lncRNA_divergent	1.35776	-4.31031	8.04979e-05	0.00270308
CATG00000022121.1	CATG00000022121.1	lncRNA_divergent	1.36797	-5.55384	1.19512e-06	8.22051e-05
CATG00000036521.1	CATG00000036521.1	lncRNA_intergenic	1.37107	-6.52348	3.95841e-08	4.13751e-06
CATG00000071765.1	CATG00000071765.1	lncRNA_divergent	1.38002	-7.55551	1.04058e-09	1.91582e-07
ENSG00000232821.1	AC003986.6	lncRNA_divergent	1.38022	-7.53246	1.12823e-09	2.02162e-07
CATG00000031446.1	CATG00000031446.1	lncRNA_intergenic	1.38042	-4.65969	2.54195e-05	0.00106226
ENSG00000177822.3	AC108142.1	lncRNA_divergent	1.38413	-6.80807	1.44816e-08	1.78491e-06
ENSG00000272622.1	RP11-395N3.2	lncRNA_intergenic	1.38491	-5.66745	8.04254e-07	5.81325e-05
CATG00000106476.1	CATG00000106476.1	lncRNA_intergenic	1.38609	-6.13185	1.57651e-07	1.38337e-05
CATG00000104381.1	CATG00000104381.1	lncRNA_intergenic	1.38707	-10.42	6.47298e-14	5.76325e-11
ENSG00000241220.1	RP11-292E2.1	lncRNA_intergenic	1.39021	-4.17404	0.000125116	0.00387205
CATG00000039908.1	CATG00000039908.1	lncRNA_divergent	1.39041	-4.59246	3.18031e-05	0.00126283
ENSG00000235823.1	LINC00263	lncRNA_intergenic	1.39041	-5.24812	3.44568e-06	0.000202403
ENSG00000271880.1	RP11-96C23.5	lncRNA_divergent	1.40087	-9.81308	4.68054e-13	2.73795e-10
ENSG00000235033.3	RP11-61I13.3	lncRNA_antisense	1.40147	-4.67099	2.4477e-05	0.00102741
ENSG00000236333.3	TRHDE-AS1	lncRNA_divergent	1.40345	-7.09701	5.22176e-09	7.52321e-07
CATG00000024016.1	CATG00000024016.1	lncRNA_divergent	1.40405	-4.3107	8.03934e-05	0.00270308
ENSG00000257181.1	RP11-611O2.5	lncRNA_divergent	1.40783	-7.77977	4.74573e-10	9.45731e-08
ENSG00000250133.2	HOXC-AS2	lncRNA_divergent	1.41341	-8.93225	8.92316e-12	2.83983e-09
ENSG00000249252.1	RP11-665G4.1	lncRNA_divergent	1.41441	-4.65137	2.61353e-05	0.00108309
ENSG00000262202.3	SNORD3D	lncRNA_intergenic	1.41501	-7.0678	5.78859e-09	8.05e-07
CATG00000031116.1	CATG00000031116.1	lncRNA_intergenic	1.41521	-4.41475	5.72138e-05	0.00204693
CATG00000008705.1	CATG00000008705.1	lncRNA_sense_intronic	1.41742	-5.40106	2.03157e-06	0.000130873
ENSG00000226891.2	RP11-182I10.3	lncRNA_intergenic	1.41842	-6.89297	1.07294e-08	1.37821e-06
CATG00000072939.1	CATG00000072939.1	lncRNA_sense_intronic	1.42244	-5.46901	1.60505e-06	0.000105306
CATG00000000027.1	CATG00000000027.1	lncRNA_intergenic	1.42869	-8.72134	1.83e-11	5.34535e-09
ENSG00000247137.4	RP11-727A23.5	lncRNA_divergent	1.42889	-10.483	5.28501e-14	5.41771e-11
ENSG00000231943.3	RP11-395L14.4	lncRNA_divergent	1.43213	-8.96142	8.08222e-12	2.65134e-09
ENSG00000235609.4	AF127936.7	lncRNA_intergenic	1.43863	-9.21327	3.45155e-12	1.33814e-09
CATG00000070953.1	CATG00000070953.1	lncRNA_intergenic	1.44189	-4.92901	1.02622e-05	0.000493954
ENSG00000229388.1	RP11-442N24__B.1	lncRNA_divergent	1.44291	-7.03558	6.48537e-09	8.80813e-07
ENSG00000255495.1	FAM85A	lncRNA_intergenic	1.4513	-8.72486	1.80808e-11	5.34535e-09
CATG00000108865.1	CATG00000108865.1	lncRNA_intergenic	1.62198	-7.44972	1.50849e-09	2.51886e-07
ENSG00000267653.1	RP1-193H18.3	lncRNA_antisense	1.6229	-4.60637	3.03649e-05	0.00121934
CATG00000092810.1	CATG00000092810.1	lncRNA_sense_intronic	1.63326	-8.19118	1.134e-10	2.65718e-08
ENSG00000241684.1	ADAMTS9-AS2	lncRNA_intergenic	1.64137	-9.79985	4.88917e-13	2.74347e-10
ENSG00000246022.2	ALDH1L1-AS2	lncRNA_divergent	1.65115	-7.53759	1.10808e-09	2.00233e-07
CATG00000000897.1	CATG00000000897.1	lncRNA_intergenic	1.66404	-5.72056	6.68025e-07	4.92883e-05
ENSG00000270022.2	RNU12	lncRNA_divergent	1.69158	-6.65772	2.46333e-08	2.7645e-06
ENSG00000255471.1	RP11-736K20.5	lncRNA_divergent	1.73005	-9.53863	1.16175e-12	5.76094e-10
ENSG00000188825.9	LINC00910	lncRNA_intergenic	1.77567	-6.72105	1.96944e-08	2.29478e-06
CATG00000102658.1	CATG00000102658.1	lncRNA_intergenic	1.96245	-6.41183	5.87194e-08	5.8236e-06
ENSG00000224745.1	RP11-380G5.2	lncRNA_sense_intronic	1.9831	-7.46965	1.4065e-09	2.40408e-07
ENSG00000241158.2	ADAMTS9-AS1	lncRNA_antisense	2.0603	-10.1936	1.34708e-13	9.90476e-11
ENSG00000264968.1	RP11-387H17.4	lncRNA_divergent	2.52686	-7.95311	2.59245e-10	5.7582e-08

## Sheet: Supplementary Table 3
Supplementary Table 3. Genes differentially expressed between baseline and 2 and baseline and 5 years post bariatric surgery and in obese inslulin sensitive versus obese insulin resistant women
geneID	geneName	geneClass	FC 2 Year	P-value 2 Year	FDR 2 Year	FC IR vs IS	P-value IR vs IS	FDR IR vs IS
CATG00000106343.1	CATG00000106343.1	lncRNA_intergenic	0.355208	3.60222e-15	7.21741e-12	0.653252	3.35e-05	0.00888097
CATG00000111229.1	ASMER-2	lncRNA_intergenic	0.469031	3.4774e-11	1.06911e-08	0.755425	0.0005222	0.0362139
CATG00000048453.1	CATG00000048453.1	lncRNA_intergenic	0.655382	4.26081e-08	4.69231e-06	0.873591	0.000647596	0.0399448
ENSG00000256164.1	RP11-264F23.3	lncRNA_divergent	0.736301	1.17108e-08	1.60192e-06	0.89167	0.000609354	0.0387449
ENSG00000236094.1	LINC00545	lncRNA_intergenic	0.876606	0.00130503	0.0248368	0.832636	5.48e-08	0.000443176
ENSG00000253434.1	RP11-1101K5.1	lncRNA_intergenic	1.14724	2.12969e-06	0.000143025	1.20433	2e-05	0.00629239
ENSG00000170919.11	TPT1-AS1	lncRNA_divergent	1.17317	4.12128e-08	4.55796e-06	1.05923	0.000928346	0.0479156
CATG00000064271.1	CATG00000064271.1	lncRNA_intergenic	1.18384	2.44176e-05	0.00107302	1.1684	0.000255053	0.0258057
ENSG00000223745.3	RP4-717I23.3	lncRNA_divergent	1.32268	1.54097e-09	2.76205e-07	1.06706	0.000975906	0.0490757
ENSG00000236333.3	TRHDE-AS1	lncRNA_divergent	1.40345	5.22193e-09	8.03065e-07	1.18479	1.44e-06	0.00172065
CATG00000000027.1	CATG00000000027.1	lncRNA_intergenic	1.42869	1.83004e-11	6.0206e-09	1.11804	0.000883649	0.0467867
ENSG00000235609.4	ASMER-1	lncRNA_intergenic	1.43863	3.45169e-12	1.49515e-09	1.12412	6.96e-05	0.0124267

## Sheet: Supplementary Table 4
Supplementary Table 4. Genes independently upregulated by each ADIPINT targeting GapmeR
geneID	geneName	geneClass	logFC.GapmeR 1	P.Value.GapmeR 1	FDR.GapmeR 1	logFC.GapmeR 2	P.Value.GapmeR 2	FDR.GapmeR 2	logFC.GapmeR 3	P.Value.GapmeR 3	FDR.GapmeR 3
ENSG00000106819.7	ASPN	coding_mRNA	-4.16	6.83e-14	1.2e-10	-1.6025	2.05e-06	8.79e-05	-3.2275	1.61e-11	1.47e-09
ENSG00000106809.6	OGN	coding_mRNA	-4.07929	3.76e-14	7.21e-11	-4.19179	1.88e-14	2.98e-11	-4.92679	2.74e-16	2.02e-13
ENSG00000113083.8	LOX	coding_mRNA	-3.66214	1.1e-06	7.92e-05	-4.14464	7.16e-08	5.35e-06	-4.09214	6.61e-07	1.44e-05
ENSG00000102265.7	TIMP1	coding_mRNA	-3.505	1.54e-16	6.39e-13	-2.725	4.04e-13	4.1e-10	-4.435	6.16e-20	5.12e-16
ENSG00000104213.8	PDGFRL	coding_mRNA	-3.435	8.1e-12	5.08e-09	-2.275	4.06e-08	3.36e-06	-3.605	2.22e-12	2.71e-10
ENSG00000079931.10	MOXD1	coding_mRNA	-3.35821	2.18e-13	3.02e-10	-2.26321	4.33e-10	8.63e-08	-3.10071	3.11e-13	5.2e-11
ENSG00000134531.5	EMP1	coding_mRNA	-3.3375	2.87e-12	2.17e-09	-2.345	6.6e-09	7.26e-07	-3.35	1.58e-12	2.03e-10
ENSG00000167779.3	IGFBP6	coding_mRNA	-3.28071	3.68e-14	7.21e-11	-1.45821	7.85e-08	5.76e-06	-3.05821	7.23e-14	1.64e-11
ENSG00000169908.6	TM4SF1	coding_mRNA	-3.20429	1.02e-11	5.93e-09	-2.31929	4.44e-09	5.35e-07	-3.86179	6.34e-14	1.49e-11
ENSG00000102007.6	PLP2	coding_mRNA	-3.10786	1.31e-14	3.97e-11	-2.67786	3.24e-13	3.59e-10	-3.54286	3.87e-16	2.57e-13
ENSG00000189058.4	APOD	coding_mRNA	-3.07393	6.36e-13	7.05e-10	-2.55143	9.27e-11	2.63e-08	-4.11893	9.04e-16	5.06e-13
ENSG00000135919.8	SERPINE2	coding_mRNA	-3.0725	9.79e-13	9.58e-10	-2.225	6.53e-10	1.22e-07	-4.45	2.45e-16	1.94e-13
ENSG00000185567.6	AHNAK2	coding_mRNA	-3.02393	1.06e-11	6.03e-09	-2.12143	1.3e-08	1.29e-06	-3.96393	2.74e-14	7.81e-12
ENSG00000135318.7	NT5E	coding_mRNA	-2.92393	4.51e-12	3.12e-09	-1.87643	2.14e-08	1.98e-06	-4.48643	2.44e-16	1.94e-13
ENSG00000013297.6	CLDN11	coding_mRNA	-2.91643	2.68e-11	1.24e-08	-3.12643	2.3e-11	9.53e-09	-4.91893	3.78e-16	2.57e-13
ENSG00000123496.3	IL13RA2	coding_mRNA	-2.90429	2.85e-11	1.3e-08	-1.52929	1.91e-06	8.28e-05	-2.12179	7.29e-09	2.82e-07
ENSG00000101265.11	RASSF2	coding_mRNA	-2.90143	5.57e-11	2.33e-08	-2.53643	2.1e-09	2.89e-07	-3.05143	1.64e-11	1.49e-09
ENSG00000134853.7	PDGFRA	coding_mRNA	-2.88643	3.22e-12	2.38e-09	-1.92643	1.3e-08	1.29e-06	-2.67643	1.07e-11	1.02e-09
ENSG00000101825.7	MXRA5	coding_mRNA	-2.86821	1.03e-13	1.63e-10	-2.21321	9.17e-11	2.63e-08	-2.03071	2.05e-10	1.27e-08
ENSG00000187955.7	COL14A1	coding_mRNA	-2.83536	2.61e-12	2.02e-09	-1.66286	5.75e-08	4.44e-06	-3.71536	5.52e-15	2.04e-12
ENSG00000154096.9	THY1	coding_mRNA	-2.79286	1.44e-06	9.91e-05	-2.55036	5.55e-07	2.94e-05	-3.37786	2.89e-07	6.92e-06
ENSG00000120708.12	TGFBI	coding_mRNA	-2.75893	9.29e-10	2.49e-07	-4.14643	4.86e-13	4.76e-10	-3.10643	1.92e-10	1.21e-08
ENSG00000139926.11	FRMD6	coding_mRNA	-2.62357	3.49e-09	7.03e-07	-2.19607	1.25e-07	8.38e-06	-2.04857	2.93e-07	7e-06
ENSG00000139329.4	LUM	coding_mRNA	-2.61821	2.29e-07	2.18e-05	-2.00821	3.46e-07	1.99e-05	-3.42571	1.55e-08	5.38e-07
ENSG00000130600.11	H19	lncRNA_intergenic	-2.59	2.49e-06	0.000155675	-1.77	3.1e-05	0.000850967	-2.6025	4.58e-06	7.86e-05
ENSG00000143196.4	DPT	coding_mRNA	-2.58964	1.45e-09	3.6e-07	-3.55964	2.06e-12	1.52e-09	-3.83964	7.21e-12	7.27e-10
ENSG00000235162.4	C12orf75	coding_mRNA	-2.57	3.98e-12	2.88e-09	-1.6625	9.53e-08	6.7e-06	-3.925	3.11e-16	2.23e-13
ENSG00000116774.7	OLFML3	coding_mRNA	-2.54607	5.62e-11	2.33e-08	-2.10607	1.17e-08	1.17e-06	-2.93857	8.34e-13	1.18e-10
ENSG00000170017.8	ALCAM	coding_mRNA	-2.47643	5.89e-13	6.76e-10	-1.87393	4.7e-10	9.24e-08	-3.75393	1.45e-17	2.67e-14
ENSG00000127083.7	OMD	coding_mRNA	-2.44643	1.55e-08	2.46e-06	-3.04893	2.75e-10	6.36e-08	-2.53143	5.22e-09	2.12e-07
ENSG00000230630.1	DNM3OS	lncRNA_antisense	-2.43357	2.41e-10	7.99e-08	-1.64107	2.19e-07	1.35e-05	-3.44857	8.62e-14	1.85e-11
ENSG00000169744.8	LDB2	coding_mRNA	-2.38964	2.19e-12	1.82e-09	-2.10214	1.92e-10	4.62e-08	-1.57464	5.49e-09	2.21e-07
ENSG00000129009.8	ISLR	coding_mRNA	-2.37679	9.48e-12	5.63e-09	-1.62929	8.07e-08	5.87e-06	-3.32429	3.02e-15	1.37e-12
ENSG00000070882.8	OSBPL3	coding_mRNA	-2.35429	1.22e-08	2.01e-06	-1.61429	6.32e-06	0.000224943	-3.44679	7.28e-12	7.3e-10
ENSG00000003436.10	TFPI	coding_mRNA	-2.35	6.27e-10	1.85e-07	-2.465	6.8e-10	1.24e-07	-3.455	2.86e-13	4.9e-11
ENSG00000078098.9	FAP	coding_mRNA	-2.33071	5.46e-10	1.67e-07	-2.29571	1.13e-09	1.79e-07	-2.29821	4.37e-10	2.45e-08
ENSG00000166825.9	ANPEP	coding_mRNA	-2.30536	8.45e-11	3.39e-08	-2.32036	1.13e-10	3.14e-08	-3.52786	9.41e-15	3.19e-12
ENSG00000164125.11	FAM198B	coding_mRNA	-2.27214	2.02e-11	1.02e-08	-2.32464	2.3e-11	9.53e-09	-1.83464	9.08e-10	4.57e-08
ENSG00000011465.12	DCN	coding_mRNA	-2.25714	1.2e-07	1.3e-05	-2.25964	1.01e-08	1.04e-06	-3.03464	1.34e-08	4.72e-07
ENSG00000211445.7	GPX3	coding_mRNA	-2.23679	1.91e-09	4.37e-07	-1.08429	0.000157665	0.00318586	-1.93929	2.28e-08	7.46e-07
ENSG00000154258.12	ABCA9	coding_mRNA	-2.235	9.11e-11	3.61e-08	-1.585	2.44e-08	2.18e-06	-2.11	5.45e-11	4.2e-09
ENSG00000142089.11	IFITM3	coding_mRNA	-2.22893	1.35e-09	3.41e-07	-2.99143	9.29e-12	4.9e-09	-3.49143	1.9e-13	3.47e-11
ENSG00000118898.11	PPL	coding_mRNA	-2.21893	8.46e-12	5.12e-09	-1.09393	2.33e-06	9.83e-05	-2.67643	1.44e-13	2.76e-11
ENSG00000143387.8	CTSK	coding_mRNA	-2.20571	1.4e-11	7.38e-09	-1.55821	2.33e-08	2.11e-06	-1.93571	1.43e-10	9.5e-09
ENSG00000122870.7	BICC1	coding_mRNA	-2.20214	2.56e-09	5.65e-07	-2.88964	1.32e-11	6.27e-09	-3.28214	3.02e-13	5.12e-11
ENSG00000120820.8	GLT8D2	coding_mRNA	-2.19607	1.56e-09	3.78e-07	-1.88857	8.76e-08	6.27e-06	-2.87607	4.54e-12	5.02e-10
ENSG00000185201.12	IFITM2	coding_mRNA	-2.19607	4.95e-08	6.33e-06	-3.25607	7.75e-11	2.36e-08	-3.75107	6.8e-12	7e-10
ENSG00000082482.9	KCNK2	coding_mRNA	-2.09464	2.45e-10	7.99e-08	-1.84714	1.17e-08	1.17e-06	-1.94214	9.64e-10	4.81e-08
ENSG00000129038.11	LOXL1	coding_mRNA	-2.07321	1.78e-09	4.1e-07	-1.97571	6.61e-09	7.26e-07	-2.62571	1.49e-11	1.39e-09
ENSG00000140092.10	FBLN5	coding_mRNA	-2.07036	6.95e-09	1.26e-06	-3.02036	1.55e-11	7.25e-09	-3.80036	4.78e-14	1.2e-11
ENSG00000049130.9	KITLG	coding_mRNA	-2.06786	5.48e-08	6.87e-06	-2.24536	1.56e-08	1.5e-06	-1.98036	7.92e-08	2.23e-06
ENSG00000137801.9	THBS1	coding_mRNA	-2.02679	9.03e-05	0.00294689	-3.18179	5.06e-08	4.05e-06	-4.29429	2.87e-08	9.14e-07
ENSG00000197614.6	MFAP5	coding_mRNA	-2.00429	7.24e-10	2.04e-07	-1.94429	3.02e-09	3.9e-07	-2.57429	1e-11	9.67e-10
ENSG00000102802.5	MEDAG	coding_mRNA	-1.99857	3.02e-10	9.74e-08	-1.92357	2.11e-09	2.89e-07	-3.20607	5.52e-15	2.04e-12
ENSG00000186340.10	THBS2	coding_mRNA	-1.99357	5.91e-09	1.09e-06	-2.84607	4.02e-12	2.48e-09	-4.10857	9.12e-16	5.06e-13
ENSG00000100196.6	KDELR3	coding_mRNA	-1.975	6.8e-08	8.17e-06	-2.445	3.83e-09	4.71e-07	-3.025	2.01e-11	1.76e-09
ENSG00000089327.10	FXYD5	coding_mRNA	-1.94786	1.03e-07	1.15e-05	-0.797857	0.00452114	0.0455953	-2.32536	2.8e-09	1.23e-07
ENSG00000205221.8	VIT	coding_mRNA	-1.94286	8.48e-08	9.79e-06	-1.46286	9.75e-06	0.000326546	-3.00536	1.68e-11	1.51e-09
ENSG00000106333.8	PCOLCE	coding_mRNA	-1.93893	1.46e-10	5.29e-08	-2.41643	1.87e-12	1.48e-09	-3.08893	7.56e-16	4.57e-13
ENSG00000153071.10	DAB2	coding_mRNA	-1.92786	1.05e-09	2.73e-07	-2.10286	3.77e-10	7.89e-08	-3.16536	2.63e-14	7.69e-12
ENSG00000110852.4	CLEC2B	coding_mRNA	-1.91929	2.67e-11	1.24e-08	-1.86429	1.4e-10	3.69e-08	-2.76429	2.51e-14	7.39e-12
ENSG00000006016.6	CRLF1	coding_mRNA	-1.91643	3.55e-09	7.12e-07	-1.96893	1.55e-09	2.27e-07	-2.13643	1.69e-10	1.1e-08
ENSG00000128656.9	CHN1	coding_mRNA	-1.90607	8.8e-09	1.52e-06	-2.02607	4.56e-09	5.44e-07	-4.06857	3.86e-15	1.61e-12
ENSG00000120885.15	CLU	coding_mRNA	-1.89607	1.53e-08	2.44e-06	-1.46607	2.44e-06	0.000101984	-2.79357	8.83e-12	8.74e-10
ENSG00000070669.12	ASNS	coding_mRNA	-1.8875	1.44e-10	5.28e-08	-2.03	3.67e-10	7.78e-08	-2.53	6.65e-13	9.87e-11
ENSG00000111371.11	SLC38A1	coding_mRNA	-1.87786	6.59e-10	1.92e-07	-2.51286	1.63e-11	7.53e-09	-2.68786	3.78e-13	6.11e-11
ENSG00000019549.4	SNAI2	coding_mRNA	-1.86679	2.63e-08	3.69e-06	-2.62679	5.09e-11	1.67e-08	-3.63929	2.45e-14	7.33e-12
ENSG00000077942.13	FBLN1	coding_mRNA	-1.85964	2e-10	6.86e-08	-2.50964	1.02e-11	5.29e-09	-4.07214	1.71e-17	2.71e-14
ENSG00000182326.10	C1S	coding_mRNA	-1.835	4.57e-09	8.68e-07	-2.115	6.74e-10	1.24e-07	-3.155	9.3e-14	1.95e-11
ENSG00000163565.14	IFI16	coding_mRNA	-1.83464	1.87e-07	1.83e-05	-1.14714	0.00022591	0.00428415	-2.64464	1.47e-10	9.74e-09
ENSG00000127241.12	MASP1	coding_mRNA	-1.83464	8.68e-08	9.96e-06	-1.65214	1.15e-06	5.38e-05	-3.06714	4.15e-12	4.62e-10
ENSG00000139263.7	LRIG3	coding_mRNA	-1.83357	9.4e-10	2.5e-07	-2.24107	2.35e-11	9.53e-09	-3.07357	1.96e-14	6.05e-12
ENSG00000103187.6	COTL1	coding_mRNA	-1.815	8.99e-10	2.45e-07	-1.4025	6.53e-08	4.94e-06	-2.8825	8.89e-15	3.05e-12
ENSG00000143369.10	ECM1	coding_mRNA	-1.81143	2.96e-11	1.33e-08	-1.51893	2.04e-09	2.88e-07	-1.20643	9.61e-08	2.63e-06
ENSG00000143320.4	CRABP2	coding_mRNA	-1.80214	7.58e-10	2.12e-07	-2.27214	7.96e-11	2.41e-08	-3.14964	2.95e-15	1.36e-12
ENSG00000121957.8	GPSM2	coding_mRNA	-1.80107	6.33e-06	0.000338861	-1.41357	0.000135219	0.00281614	-2.21107	4.2e-07	9.65e-06
ENSG00000108821.9	COL1A1	coding_mRNA	-1.80071	5.12e-07	4.18e-05	-2.46321	3.41e-09	4.25e-07	-3.13321	6.48e-11	4.88e-09
ENSG00000197635.5	DPP4	coding_mRNA	-1.79857	1.76e-10	6.16e-08	-1.20357	1.86e-06	8.11e-05	-2.81857	3.6e-15	1.53e-12
ENSG00000145147.15	SLIT2	coding_mRNA	-1.77464	7.58e-09	1.33e-06	-1.85714	2.07e-09	2.88e-07	-3.44464	3.23e-15	1.44e-12
ENSG00000137831.10	UACA	coding_mRNA	-1.77357	1.57e-09	3.78e-07	-1.53607	8.43e-09	8.95e-07	-2.77357	2.78e-14	7.81e-12
ENSG00000236562.3	RP11-396M11.1	pseudogene	-1.77107	1.03e-05	0.000507564	-2.48107	2.96e-07	1.77e-05	-3.07357	9.57e-09	3.56e-07
ENSG00000106546.8	AHR	coding_mRNA	-1.76357	1.84e-10	6.39e-08	-2.25857	3.87e-12	2.43e-09	-2.60357	3.87e-14	1.02e-11
ENSG00000163661.3	PTX3	coding_mRNA	-1.76321	6.53e-08	7.96e-06	-3.43321	6.88e-13	6.36e-10	-4.40571	8.61e-16	4.94e-13
ENSG00000026508.12	CD44	coding_mRNA	-1.75679	1.9e-11	9.75e-09	-1.29929	3.72e-08	3.15e-06	-2.67179	2.49e-15	1.18e-12
ENSG00000258399.2	MEG8	lncRNA_intergenic	-1.74964	1.44e-06	9.89e-05	-1.76714	5.71e-07	3e-05	-1.56214	3.43e-06	6.13e-05
ENSG00000196924.10	FLNA	coding_mRNA	-1.74036	3.22e-07	2.89e-05	-2.35536	1.68e-09	2.45e-07	-2.73786	6.78e-11	5.05e-09
ENSG00000164294.9	GPX8	coding_mRNA	-1.73321	9.06e-09	1.55e-06	-1.95821	3.32e-09	4.19e-07	-2.12821	1.06e-10	7.45e-09
ENSG00000092621.7	PHGDH	coding_mRNA	-1.72964	3.58e-06	0.000211062	-2.72214	6.19e-09	6.91e-07	-3.29964	2.32e-11	2.01e-09
ENSG00000148908.10	RGS10	coding_mRNA	-1.72929	1.04e-07	1.16e-05	-1.45929	8.95e-06	0.0003027	-2.96929	3.4e-12	3.89e-10
ENSG00000049323.11	LTBP1	coding_mRNA	-1.72786	2.68e-09	5.8e-07	-3.35036	4.72e-15	1.05e-11	-3.71286	2.51e-16	1.94e-13
ENSG00000070081.11	NUCB2	coding_mRNA	-1.72536	1.47e-11	7.66e-09	-1.61786	3.45e-10	7.46e-08	-1.72036	1.54e-11	1.42e-09
ENSG00000106976.14	DNM1	coding_mRNA	-1.72286	1.63e-10	5.78e-08	-1.25536	5.4e-08	4.23e-06	-1.11286	2.43e-07	5.97e-06
ENSG00000157613.6	CREB3L1	coding_mRNA	-1.70036	6.43e-08	7.86e-06	-2.17286	3.37e-09	4.21e-07	-3.00786	2.89e-12	3.38e-10
ENSG00000124343.8	XG	coding_mRNA	-1.69107	3.83e-09	7.63e-07	-1.40107	6.92e-07	3.5e-05	-2.11107	3.36e-11	2.78e-09
ENSG00000075618.13	FSCN1	coding_mRNA	-1.68536	1.62e-10	5.78e-08	-1.89286	1.59e-10	4.07e-08	-2.48036	7.1e-14	1.62e-11
ENSG00000185070.6	FLRT2	coding_mRNA	-1.675	1.57e-06	0.000106669	-1.2525	4.67e-05	0.00118231	-1.8675	1.43e-07	3.75e-06
ENSG00000154027.14	AK5	coding_mRNA	-1.66536	2.52e-07	2.33e-05	-2.14036	1.69e-09	2.46e-07	-2.23536	9.29e-10	4.66e-08
ENSG00000115414.14	FN1	coding_mRNA	-1.66536	5.64e-09	1.05e-06	-2.09036	1.55e-10	4.03e-08	-2.74786	2.34e-13	4.08e-11
ENSG00000165124.13	SVEP1	coding_mRNA	-1.65714	0.000573739	0.0125461	-3.22464	2.65e-08	2.35e-06	-3.29214	6.66e-07	1.45e-05
ENSG00000038427.11	VCAN	coding_mRNA	-1.6475	1.33e-07	1.41e-05	-1.7	1.4e-07	9.32e-06	-3.61	2.67e-14	7.71e-12
ENSG00000202048.1	SNORD114-20	small_RNA	-1.6425	1.34e-07	1.41e-05	-1.12	3.88e-05	0.00101142	-1.15	2.6e-05	0.000353188
ENSG00000107984.5	DKK1	coding_mRNA	-1.63714	1.71e-07	1.7e-05	-1.23714	1.84e-05	0.000549016	-3.49964	7.02e-14	1.62e-11
ENSG00000101000.4	PROCR	coding_mRNA	-1.62429	6.72e-07	5.26e-05	-1.55929	1.27e-06	5.9e-05	-3.94679	1.58e-14	5.01e-12
ENSG00000244405.3	ETV5	coding_mRNA	-1.61286	1.47e-08	2.35e-06	-0.725357	0.00172485	0.0217965	-2.02286	2.69e-10	1.61e-08
ENSG00000164932.8	CTHRC1	coding_mRNA	-1.60464	2.24e-08	3.24e-06	-2.15714	1.88e-10	4.59e-08	-3.02714	1.02e-13	2.12e-11
ENSG00000138615.4	CILP	coding_mRNA	-1.59821	2.43e-07	2.27e-05	-0.795714	0.00246137	0.0287145	-0.625714	0.0082952	0.0468021
ENSG00000111728.6	ST8SIA1	coding_mRNA	-1.5925	2.28e-07	2.18e-05	-1.025	9.96e-05	0.00219507	-3.0025	8e-13	1.14e-10
ENSG00000107562.12	CXCL12	coding_mRNA	-1.59179	5.96e-09	1.1e-06	-1.24679	3.96e-06	0.000153282	-1.30179	1.35e-07	3.56e-06
ENSG00000201036.1	SNORD113	small_RNA	-1.58321	7.5e-08	8.85e-06	-1.21071	7.58e-06	0.000263243	-1.31321	9.52e-06	0.000147561
ENSG00000196352.9	CD55	coding_mRNA	-1.57464	2.39e-11	1.15e-08	-1.79714	7.48e-12	4.22e-09	-2.68964	8.36e-16	4.88e-13
ENSG00000124942.9	AHNAK	coding_mRNA	-1.56357	1.31e-07	1.39e-05	-1.49857	3.6e-07	2.05e-05	-2.48857	1.83e-11	1.63e-09
ENSG00000138119.12	MYOF	coding_mRNA	-1.56071	3.88e-09	7.68e-07	-1.61321	3.16e-09	4.02e-07	-1.91821	3.71e-11	3.05e-09
ENSG00000127951.5	FGL2	coding_mRNA	-1.55643	4.2e-09	8.12e-07	-1.29893	1.77e-07	1.13e-05	-0.616429	0.00212754	0.0155316
ENSG00000185885.11	IFITM1	coding_mRNA	-1.55536	2.32e-06	0.00014769	-2.49286	1.44e-09	2.18e-07	-3.19536	5.81e-12	6.16e-10
ENSG00000113657.8	DPYSL3	coding_mRNA	-1.55429	1.17e-07	1.28e-05	-1.17929	5.61e-06	0.00020494	-2.36929	2.64e-12	3.15e-10
ENSG00000167601.7	AXL	coding_mRNA	-1.54143	3.48e-09	7.03e-07	-1.26893	1.28e-07	8.56e-06	-2.11393	5.12e-11	3.99e-09
ENSG00000164692.13	COL1A2	coding_mRNA	-1.53857	2.72e-08	3.79e-06	-1.59607	1.56e-08	1.5e-06	-2.34107	4.38e-11	3.49e-09
ENSG00000162618.8	ELTD1	coding_mRNA	-1.53036	7.34e-08	8.69e-06	-1.58536	5e-09	5.8e-07	-2.19536	2.96e-12	3.46e-10
ENSG00000111961.12	SASH1	coding_mRNA	-1.52857	1.08e-07	1.2e-05	-1.36107	1.53e-06	6.91e-05	-1.89357	2.61e-09	1.15e-07
ENSG00000178031.11	ADAMTSL1	coding_mRNA	-1.52357	5.15e-06	0.000284228	-1.29857	1.04e-05	0.000342074	-3.43857	1.4e-12	1.84e-10
ENSG00000131016.12	AKAP12	coding_mRNA	-1.51964	8.96e-10	2.45e-07	-1.21464	1.69e-07	1.09e-05	-2.28464	3.31e-13	5.45e-11
CATG00000096485.1	CATG00000096485.1	lncRNA_antisense	-1.50643	4.81e-07	3.98e-05	-0.873929	0.000742656	0.011315	-2.03393	1.83e-09	8.42e-08
ENSG00000255248.2	RP11-166D19.1	lncRNA_intergenic	-1.50393	3.66e-07	3.18e-05	-2.01893	2.85e-10	6.54e-08	-3.96893	1.2e-16	1.21e-13
ENSG00000010810.13	FYN	coding_mRNA	-1.50036	2.05e-09	4.67e-07	-1.32536	8.98e-08	6.38e-06	-1.54786	5.51e-10	2.95e-08
ENSG00000143867.5	OSR1	coding_mRNA	-1.49286	3.49e-08	4.6e-06	-1.05286	9.61e-06	0.000323016	-1.82286	5.09e-10	2.77e-08
ENSG00000142552.3	RCN3	coding_mRNA	-1.49036	5.3e-08	6.71e-06	-2.48036	1.16e-11	5.74e-09	-1.87786	4.55e-10	2.51e-08
ENSG00000104728.11	ARHGEF10	coding_mRNA	-1.48857	2.37e-08	3.4e-06	-1.77107	4.92e-10	9.63e-08	-2.25607	1.92e-12	2.39e-10
ENSG00000172260.9	NEGR1	coding_mRNA	-1.48821	1.55e-05	0.000698583	-0.860714	0.00451636	0.0455747	-1.09071	0.000456143	0.00417138
ENSG00000200406.1	SNORD114-23	small_RNA	-1.485	1.34e-07	1.41e-05	-0.6775	0.00235504	0.0277564	-1.1	1.31e-05	0.000195243
ENSG00000257017.4	HP	coding_mRNA	-1.48429	1.08e-08	1.82e-06	-1.73179	1.92e-09	2.72e-07	-1.04679	3.36e-06	6.03e-05
ENSG00000116132.7	PRRX1	coding_mRNA	-1.48286	2.14e-09	4.81e-07	-2.02036	4.61e-11	1.55e-08	-1.61036	3.16e-10	1.84e-08
ENSG00000164220.6	F2RL2	coding_mRNA	-1.47893	5.37e-06	0.000294888	-1.54143	5.51e-06	0.000201392	-2.08643	1.97e-08	6.57e-07
ENSG00000139278.5	GLIPR1	coding_mRNA	-1.47571	7.83e-06	0.000402437	-1.43321	1.4e-05	0.000436028	-3.84321	1.65e-13	3.1e-11
ENSG00000201240.1	SNORD114-9	small_RNA	-1.47393	2.38e-07	2.24e-05	-0.826429	0.00059592	0.00938905	-1.07893	8.34e-05	0.000962568
ENSG00000178035.7	IMPDH2	coding_mRNA	-1.47357	1.63e-09	3.78e-07	-1.52357	4.95e-09	5.78e-07	-2.03357	3.32e-12	3.83e-10
ENSG00000146242.5	TPBG	coding_mRNA	-1.46214	1.13e-07	1.24e-05	-1.39714	7.16e-07	3.61e-05	-2.66714	4.71e-13	7.31e-11
ENSG00000154736.5	ADAMTS5	coding_mRNA	-1.4525	1.13e-07	1.24e-05	-2.685	1.57e-12	1.31e-09	-1.33	2.67e-07	6.45e-06
ENSG00000100234.11	TIMP3	coding_mRNA	-1.4525	2.97e-09	6.13e-07	-1.6625	2.35e-09	3.18e-07	-3.25	2.39e-16	1.94e-13
ENSG00000100626.12	GALNT16	coding_mRNA	-1.44464	4.41e-07	3.68e-05	-1.19464	6.07e-06	0.000217889	-1.88714	1.61e-09	7.51e-08
ENSG00000173905.4	GOLIM4	coding_mRNA	-1.43393	2.59e-09	5.67e-07	-1.63143	7.09e-10	1.27e-07	-1.46393	4.15e-09	1.73e-07
ENSG00000168386.14	FILIP1L	coding_mRNA	-1.43	5.82e-08	7.25e-06	-2.1275	8.96e-11	2.61e-08	-3.7175	1.74e-16	1.56e-13
ENSG00000146674.10	IGFBP3	coding_mRNA	-1.41679	2.37e-06	0.000149271	-2.07679	5.31e-09	6.06e-07	-0.704286	0.00455889	0.0289977
ENSG00000189320.4	FAM180A	coding_mRNA	-1.41429	1.97e-08	2.96e-06	-0.694286	0.000692359	0.0106709	-1.69679	1.27e-09	6.12e-08
ENSG00000158710.10	TAGLN2	coding_mRNA	-1.41286	9.37e-07	6.89e-05	-1.41536	8.13e-07	4e-05	-2.08536	2.55e-10	1.53e-08
ENSG00000222041.6	LINC00152	lncRNA_intergenic	-1.40143	1.2e-06	8.56e-05	-1.60143	1.67e-07	1.09e-05	-2.56893	1.92e-11	1.7e-09
ENSG00000102359.5	SRPX2	coding_mRNA	-1.39679	2.48e-07	2.31e-05	-0.726786	0.00108206	0.0150962	-2.00929	1.89e-10	1.2e-08
ENSG00000085063.10	CD59	coding_mRNA	-1.38821	2.17e-06	0.000140101	-0.880714	0.0010478	0.0147684	-1.39321	2.19e-06	4.15e-05
ENSG00000198121.9	LPAR1	coding_mRNA	-1.38	6.33e-08	7.77e-06	-1.94	3.75e-10	7.88e-08	-1.915	1.11e-10	7.8e-09
ENSG00000011638.6	TMEM159	coding_mRNA	-1.37929	5.02e-06	0.00027829	-1.19429	4.42e-05	0.00112799	-1.91179	2.13e-08	7.02e-07
ENSG00000106366.7	SERPINE1	coding_mRNA	-1.375	4.12e-07	3.5e-05	-1.5425	6.68e-08	5.02e-06	-2.8275	8.29e-13	1.18e-10
ENSG00000250337.1	LINC01021	lncRNA_intergenic	-1.36429	8.43e-08	9.79e-06	-0.894286	6.42e-05	0.00153911	-3.29929	2.05e-15	1.02e-12
ENSG00000225746.4	AL132709.5	lncRNA_intergenic	-1.36286	7.04e-08	8.39e-06	-1.21536	3.3e-07	1.91e-05	-1.09036	1.22e-05	0.000184154
ENSG00000065911.7	MTHFD2	coding_mRNA	-1.36286	1.69e-07	1.69e-05	-1.89786	2.74e-09	3.64e-07	-2.51036	1.68e-12	2.13e-10
ENSG00000147459.13	DOCK5	coding_mRNA	-1.36179	8.5e-08	9.79e-06	-1.27179	2.19e-07	1.35e-05	-2.69929	9.07e-14	1.92e-11
ENSG00000089159.11	PXN	coding_mRNA	-1.35857	9.81e-07	7.17e-05	-0.943571	0.000115532	0.00247777	-2.41857	1.84e-11	1.63e-09
ENSG00000145730.16	PAM	coding_mRNA	-1.35786	1.18e-09	3.01e-07	-1.21036	1.18e-05	0.000378521	-1.90786	4.25e-13	6.7e-11
ENSG00000174348.9	PODN	coding_mRNA	-1.35679	1.35e-05	0.000630193	-2.49429	1.01e-09	1.64e-07	-2.78929	5.5e-11	4.21e-09
ENSG00000065308.4	TRAM2	coding_mRNA	-1.35607	7.1e-09	1.28e-06	-1.66107	1.18e-10	3.21e-08	-2.47357	1.2e-14	4e-12
ENSG00000111145.3	ELK3	coding_mRNA	-1.35357	7.61e-08	8.94e-06	-0.741071	0.000229369	0.00433455	-1.95857	1.34e-11	1.26e-09
ENSG00000185215.4	TNFAIP2	coding_mRNA	-1.35107	6.23e-07	4.95e-05	-0.638571	0.00465753	0.0466173	-0.953571	6.62e-05	0.000791222
ENSG00000079102.12	RUNX1T1	coding_mRNA	-1.35071	3.73e-06	0.000218233	-1.68821	1.3e-07	8.66e-06	-2.31821	5.35e-10	2.88e-08
ENSG00000138735.11	PDE5A	coding_mRNA	-1.34857	2.47e-06	0.000154971	-1.56357	5.11e-07	2.74e-05	-1.54357	2.19e-07	5.45e-06
ENSG00000142227.6	EMP3	coding_mRNA	-1.34786	3.15e-06	0.000189521	-1.21286	2.63e-05	0.00074703	-1.89536	7.5e-09	2.9e-07
ENSG00000136010.9	ALDH1L2	coding_mRNA	-1.34321	1.41e-06	9.73e-05	-2.00571	6.84e-09	7.46e-07	-1.76071	1.81e-08	6.12e-07
ENSG00000168477.13	TNXB	coding_mRNA	-1.33786	1.47e-07	1.51e-05	-2.33786	1.98e-12	1.52e-09	-1.89536	6.63e-10	3.47e-08
ENSG00000125430.4	HS3ST3B1	coding_mRNA	-1.33536	1.59e-05	0.000716388	-1.28786	4.54e-05	0.001154	-2.28536	1.8e-09	8.28e-08
ENSG00000206560.6	ANKRD28	coding_mRNA	-1.33464	3.8e-07	3.27e-05	-0.604643	0.0041921	0.0431403	-1.70214	2.92e-09	1.27e-07
ENSG00000232527.3	RP11-14N7.2	lncRNA_intergenic	-1.33321	1.13e-08	1.9e-06	-1.24821	2.45e-08	2.19e-06	-2.74571	5.26e-16	3.37e-13
ENSG00000101955.10	SRPX	coding_mRNA	-1.33286	3.22e-09	6.6e-07	-1.41036	3.17e-09	4.02e-07	-1.17786	2.58e-08	8.34e-07
ENSG00000135472.4	FAIM2	coding_mRNA	-1.33036	1.35e-06	9.4e-05	-1.73286	4.31e-08	3.54e-06	-3.31286	3.73e-14	1e-11
ENSG00000121858.6	TNFSF10	coding_mRNA	-1.32964	1.66e-05	0.000740312	-1.37214	2.3e-05	0.000665362	-3.48214	9.39e-13	1.29e-10
ENSG00000070214.11	SLC44A1	coding_mRNA	-1.32893	6.71e-08	8.1e-06	-0.871429	7.8e-05	0.00179848	-1.90893	6.87e-11	5.11e-09
ENSG00000101236.12	RNF24	coding_mRNA	-1.3275	3.67e-08	4.81e-06	-0.7375	0.000268137	0.00491516	-1.6025	1.08e-09	5.32e-08
ENSG00000141756.14	FKBP10	coding_mRNA	-1.32536	1.34e-07	1.41e-05	-2.38036	5.77e-12	3.36e-09	-2.52786	2.71e-12	3.22e-10
ENSG00000140105.13	WARS	coding_mRNA	-1.32143	6.08e-06	0.00032606	-1.74393	2.2e-07	1.35e-05	-1.96393	7.9e-09	3.01e-07
ENSG00000148516.17	ZEB1	coding_mRNA	-1.31893	2.51e-08	3.54e-06	-2.05143	4.57e-12	2.76e-09	-1.64393	1.23e-10	8.48e-09
ENSG00000109610.5	SOD3	coding_mRNA	-1.31821	2.93e-06	0.00017937	-0.958214	0.000154559	0.00312882	-1.23571	5.15e-06	8.69e-05
ENSG00000178209.10	PLEC	coding_mRNA	-1.3175	1.5e-07	1.53e-05	-1.1925	7.47e-07	3.74e-05	-2.1475	1.53e-11	1.42e-09
ENSG00000159403.11	C1R	coding_mRNA	-1.31607	8.51e-08	9.79e-06	-2.09107	7.73e-11	2.36e-08	-2.96107	1.22e-14	4e-12
ENSG00000144891.13	AGTR1	coding_mRNA	-1.30821	1.29e-07	1.38e-05	-1.33821	2.65e-06	0.000109403	-2.60571	1.1e-13	2.27e-11
ENSG00000013364.14	MVP	coding_mRNA	-1.30607	8.57e-05	0.00281341	-1.00107	0.00219553	0.0263147	-1.39857	3.2e-05	0.000423065
ENSG00000137507.7	LRRC32	coding_mRNA	-1.30464	3.62e-06	0.000212761	-1.35214	1.79e-06	7.87e-05	-1.17464	8.66e-06	0.000136324
ENSG00000176826.11	FKBP9L	pseudogene	-1.30214	2.66e-06	0.000164305	-1.74964	3.8e-08	3.21e-06	-1.89714	5.22e-09	2.12e-07
ENSG00000169213.6	RAB3B	coding_mRNA	-1.29857	4.16e-05	0.00158495	-1.21857	7.01e-05	0.0016467	-3.49107	3.23e-13	5.37e-11
ENSG00000118113.7	MMP8	coding_mRNA	-1.2975	3.93e-07	3.36e-05	-1.6175	2.09e-08	1.94e-06	-2.66	4.04e-13	6.43e-11
ENSG00000124749.12	COL21A1	coding_mRNA	-1.2975	1.64e-05	0.000734665	-2.895	5.69e-10	1.08e-07	-1.6375	5.88e-07	1.29e-05
ENSG00000107796.8	ACTA2	coding_mRNA	-1.29571	2.53e-06	0.000157703	-1.20821	1.08e-05	0.000354117	-2.28321	1.22e-10	8.45e-09
ENSG00000136048.9	DRAM1	coding_mRNA	-1.29357	1.79e-07	1.77e-05	-0.928571	2.97e-05	0.000824603	-3.63607	2.63e-16	1.99e-13
ENSG00000149090.7	PAMR1	coding_mRNA	-1.2925	5e-05	0.00182898	-1.555	4.09e-06	0.000156454	-2.61	7.9e-10	4.05e-08
ENSG00000090621.9	PABPC4	coding_mRNA	-1.29036	3.76e-07	3.24e-05	-1.72286	2.25e-08	2.05e-06	-1.43536	2.2e-08	7.23e-07
ENSG00000114771.9	AADAC	coding_mRNA	-1.28286	7.91e-08	9.23e-06	-3.24786	3.28e-15	8.39e-12	-1.73036	4.55e-10	2.51e-08
ENSG00000272822.1	RP11-302B13.5	coding_mRNA	-1.28214	2.65e-07	2.44e-05	-1.11714	3.53e-06	0.000139397	-1.11714	2.02e-06	3.86e-05
ENSG00000125384.6	PTGER2	coding_mRNA	-1.27857	5.3e-07	4.32e-05	-1.35857	2.97e-07	1.77e-05	-1.28357	4.7e-07	1.07e-05
ENSG00000064309.10	CDON	coding_mRNA	-1.2775	1.02e-06	7.41e-05	-1.8325	5.55e-09	6.28e-07	-1.615	1.47e-08	5.17e-07
ENSG00000150636.11	CCDC102B	coding_mRNA	-1.27679	7.6e-07	5.81e-05	-0.734286	0.000638371	0.00996351	-1.46929	5.17e-08	1.54e-06
ENSG00000225511.2	LINC00475	lncRNA_intergenic	-1.26143	1.07e-05	0.000527709	-1.02393	7.77e-05	0.00179372	-2.85393	7.31e-13	1.06e-10
ENSG00000164023.10	SGMS2	coding_mRNA	-1.26107	5.79e-08	7.25e-06	-1.36357	1.11e-07	7.6e-06	-2.53607	2.79e-14	7.81e-12
ENSG00000188257.6	PLA2G2A	coding_mRNA	-1.26107	5.63e-06	0.000305387	-1.82857	1.06e-08	1.08e-06	-2.52607	7.38e-12	7.37e-10
ENSG00000050165.13	DKK3	coding_mRNA	-1.26036	1.51e-06	0.000102857	-1.82286	6.95e-10	1.26e-07	-1.71536	2.58e-09	1.14e-07
ENSG00000143429.5	AC027612.6	pseudogene	-1.25679	3.24e-07	2.89e-05	-1.25429	5.81e-07	3.04e-05	-2.71929	1.13e-13	2.29e-11
ENSG00000136830.7	FAM129B	coding_mRNA	-1.25286	7.08e-07	5.5e-05	-1.31036	4e-07	2.23e-05	-2.05036	2.27e-10	1.39e-08
ENSG00000201569.1	SNORD114-17	small_RNA	-1.25	4.4e-05	0.00165418	-1.5925	1.59e-06	7.14e-05	-1.2775	2.18e-05	0.000304147
ENSG00000148180.12	GSN	coding_mRNA	-1.24857	2.74e-09	5.88e-07	-1.42107	6.76e-10	1.24e-07	-2.19357	3.81e-14	1.01e-11
ENSG00000019144.12	PHLDB1	coding_mRNA	-1.24429	9.04e-07	6.73e-05	-1.16179	5.26e-06	0.000193602	-1.35929	1.55e-07	4.07e-06
ENSG00000115415.14	STAT1	coding_mRNA	-1.24429	1.58e-08	2.48e-06	-1.72679	1.76e-10	4.41e-08	-1.04679	1.92e-07	4.9e-06
ENSG00000134802.13	SLC43A3	coding_mRNA	-1.24321	7.5e-07	5.76e-05	-0.745714	0.00111181	0.0154142	-1.89571	2.91e-10	1.71e-08
ENSG00000016864.12	GLT8D1	coding_mRNA	-1.24214	1.96e-06	0.000128481	-1.51714	9.43e-08	6.66e-06	-2.29214	2.68e-11	2.28e-09
ENSG00000140416.15	TPM1	coding_mRNA	-1.23786	2.8e-05	0.00114143	-2.36036	6.52e-09	7.2e-07	-3.02786	6.96e-12	7.1e-10
ENSG00000111678.6	C12orf57	coding_mRNA	-1.23321	1.12e-06	8.04e-05	-1.61821	2.07e-08	1.93e-06	-2.57821	1.21e-12	1.6e-10
ENSG00000134954.10	ETS1	coding_mRNA	-1.23107	6.73e-07	5.26e-05	-1.20607	4.88e-07	2.64e-05	-1.27857	1.04e-07	2.82e-06
ENSG00000079150.13	FKBP7	coding_mRNA	-1.22714	6.46e-07	5.09e-05	-1.39464	6.12e-07	3.17e-05	-1.80714	2.37e-09	1.06e-07
ENSG00000165633.8	VSTM4	coding_mRNA	-1.22571	7.21e-07	5.58e-05	-1.63321	1.25e-08	1.24e-06	-0.900714	4.6e-05	0.00057936
ENSG00000163520.9	FBLN2	coding_mRNA	-1.22071	2.16e-06	0.000139891	-1.82571	5.25e-09	6.04e-07	-1.72321	6.93e-09	2.71e-07
ENSG00000122861.11	PLAU	coding_mRNA	-1.21893	1e-05	0.000496685	-1.18893	4.47e-06	0.000167916	-1.87393	2.1e-09	9.5e-08
ENSG00000162407.8	PPAP2B	coding_mRNA	-1.21821	7.44e-07	5.74e-05	-2.07571	1.8e-10	4.48e-08	-2.49071	1.56e-12	2.02e-10
CATG00000001347.1	CATG00000001347.1	uncertain_coding	-1.21786	7.98e-06	0.00040773	-0.815357	0.00244189	0.0285274	-1.53286	2.02e-07	5.11e-06
ENSG00000110092.3	CCND1	coding_mRNA	-1.21643	5.94e-07	4.76e-05	-0.976429	0.000128054	0.00268711	-1.21893	4.67e-07	1.06e-05
ENSG00000107560.6	RAB11FIP2	coding_mRNA	-1.21286	9.49e-09	1.61e-06	-0.965357	4.02e-06	0.000154627	-1.14786	4.23e-08	1.29e-06
ENSG00000171408.9	PDE7B	coding_mRNA	-1.21179	2.75e-08	3.79e-06	-0.959286	1.98e-06	8.53e-05	-0.404286	0.00927533	0.0509492
ENSG00000197747.4	S100A10	coding_mRNA	-1.205	4.78e-06	0.000266992	-0.925	0.000231867	0.00437431	-1.54	2.43e-07	5.96e-06
ENSG00000071967.7	CYBRD1	coding_mRNA	-1.20429	6.77e-07	5.27e-05	-1.51429	3.6e-08	3.06e-06	-1.04679	5.48e-06	9.15e-05
ENSG00000164171.6	ITGA2	coding_mRNA	-1.20393	1.57e-05	0.000705267	-0.726429	0.00337361	0.0366794	-1.83893	5.73e-08	1.68e-06
ENSG00000077232.12	DNAJC10	coding_mRNA	-1.20393	1.23e-08	2.01e-06	-1.33393	9.41e-09	9.84e-07	-1.34143	1.55e-09	7.3e-08
ENSG00000204387.8	C6orf48	coding_mRNA	-1.20286	4.69e-08	6.03e-06	-2.09036	3.28e-12	2.22e-09	-2.58786	4.12e-15	1.69e-12
ENSG00000176658.12	MYO1D	coding_mRNA	-1.19929	1.77e-07	1.75e-05	-1.45179	4.71e-09	5.53e-07	-1.56429	5.3e-10	2.87e-08
ENSG00000115641.14	FHL2	coding_mRNA	-1.1975	1.37e-05	0.000636602	-1.15	9.99e-05	0.00219954	-3.05	7.22e-13	1.05e-10
ENSG00000107554.11	DNMBP	coding_mRNA	-1.19464	2.06e-07	2e-05	-0.729643	0.000257655	0.00475297	-1.79714	8.65e-11	6.27e-09
ENSG00000198518.5	HIST1H4E	coding_mRNA	-1.18929	2.13e-06	0.000137866	-1.33429	2.99e-07	1.77e-05	-0.944286	2.94e-05	0.000393489
ENSG00000136542.4	GALNT5	coding_mRNA	-1.18857	2.09e-06	0.000135973	-0.911071	8.45e-05	0.00191486	-4.11357	8.24e-17	9.13e-14
ENSG00000129048.6	ACKR4	coding_mRNA	-1.18393	2.25e-05	0.000950268	-1.41143	2.43e-06	0.000101868	-0.766429	0.00164884	0.0125752
ENSG00000267534.1	S1PR2	coding_mRNA	-1.18393	1.23e-05	0.000585602	-1.12893	3.03e-05	0.000838051	-1.93643	5.46e-09	2.2e-07
ENSG00000133466.9	C1QTNF6	coding_mRNA	-1.18214	6.52e-07	5.13e-05	-0.597143	0.00250257	0.0291135	-0.852143	8.94e-05	0.00102037
ENSG00000122707.7	RECK	coding_mRNA	-1.18107	2.03e-08	3.02e-06	-1.66607	4.31e-10	8.63e-08	-1.60607	6.76e-11	5.05e-09
ENSG00000132274.11	TRIM22	coding_mRNA	-1.17714	1.04e-07	1.16e-05	-0.912143	2.56e-05	0.000731561	-1.83214	3.38e-11	2.79e-09
ENSG00000141338.9	ABCA8	coding_mRNA	-1.17714	5.24e-06	0.000288174	-2.53714	3.7e-11	1.31e-08	-3.01964	1.95e-13	3.51e-11
ENSG00000138134.7	STAMBPL1	coding_mRNA	-1.17071	8.35e-07	6.3e-05	-1.40071	1.2e-07	8.09e-06	-1.31571	1.76e-07	4.55e-06
ENSG00000114942.9	EEF1B2	coding_mRNA	-1.16607	2.45e-05	0.00102413	-1.10357	6.95e-05	0.00164014	-1.48357	9.57e-07	2e-05
ENSG00000156587.11	UBE2L6	coding_mRNA	-1.16143	4.25e-06	0.000241358	-1.13643	7.04e-05	0.00165259	-2.02143	2.44e-10	1.47e-08
ENSG00000110090.8	CPT1A	coding_mRNA	-1.15929	0.000109656	0.00342457	-1.54429	3.01e-06	0.000122765	-1.79929	2.42e-07	5.94e-06
ENSG00000150630.2	VEGFC	coding_mRNA	-1.15786	3.39e-07	3.02e-05	-0.572857	0.002411	0.0282734	-3.39036	8.07e-16	4.79e-13
ENSG00000198795.6	ZNF521	coding_mRNA	-1.1575	2.58e-05	0.00107109	-0.9775	0.000133206	0.00277945	-2.37	7.31e-11	5.4e-09
ENSG00000132718.7	SYT11	coding_mRNA	-1.15714	0.000267457	0.0069497	-1.49214	2.65e-05	0.000751783	-3.50214	3.93e-12	4.42e-10
ENSG00000230024.1	RP11-95P13.1	lncRNA_intergenic	-1.15679	1.64e-06	0.000110244	-0.899286	4.43e-05	0.00113017	-0.881786	2.84e-05	0.00038136
ENSG00000166888.6	STAT6	coding_mRNA	-1.15357	4.38e-06	0.000248068	-1.12107	6.38e-06	0.000226532	-1.45107	6.94e-08	2e-06
ENSG00000138061.7	CYP1B1	coding_mRNA	-1.15321	1.67e-06	0.000112087	-1.10321	4.28e-06	0.000161842	-2.02321	1.76e-10	1.14e-08
ENSG00000184584.8	TMEM173	coding_mRNA	-1.14929	6.67e-06	0.000354416	-1.02179	6.78e-05	0.001603	-1.79429	9.38e-09	3.49e-07
ENSG00000174099.6	MSRB3	coding_mRNA	-1.14929	1.54e-06	0.000105006	-1.90179	3.48e-10	7.47e-08	-1.87179	2.63e-10	1.57e-08
ENSG00000106624.4	AEBP1	coding_mRNA	-1.135	0.00192735	0.0315625	-1.8475	4.06e-06	0.000155733	-1.2875	0.00084706	0.00716329
ENSG00000108691.5	CCL2	coding_mRNA	-1.13429	9.17e-05	0.00298222	-1.23929	6.63e-05	0.0015734	-2.35929	2.41e-09	1.07e-07
ENSG00000060138.8	YBX3	coding_mRNA	-1.13357	1.38e-07	1.43e-05	-0.891071	2.68e-05	0.000757838	-1.63607	1.24e-10	8.53e-09
ENSG00000108854.11	SMURF2	coding_mRNA	-1.13214	6.28e-08	7.74e-06	-0.907143	6.3e-06	0.000224854	-2.34964	4e-14	1.05e-11
ENSG00000153993.9	SEMA3D	coding_mRNA	-1.13	9.02e-07	6.73e-05	-3.15	1.74e-14	2.98e-11	-2.3725	7.5e-13	1.08e-10
ENSG00000117122.9	MFAP2	coding_mRNA	-1.12143	5.85e-06	0.000315505	-1.53893	1.01e-07	7.02e-06	-1.50393	3.44e-08	1.07e-06
ENSG00000116106.7	EPHA4	coding_mRNA	-1.12071	1.24e-05	0.000589437	-1.28071	2.9e-06	0.000118631	-1.63571	1.57e-08	5.43e-07
ENSG00000137331.11	IER3	coding_mRNA	-1.11786	1.28e-05	0.000602889	-0.955357	0.000142932	0.00295092	-1.99786	1.32e-09	6.34e-08
ENSG00000131080.10	EDA2R	coding_mRNA	-1.11786	0.000153009	0.00447982	-0.937857	0.000981204	0.0141154	-2.03786	2.97e-08	9.41e-07
ENSG00000187109.9	NAP1L1	coding_mRNA	-1.11714	1.88e-08	2.85e-06	-1.52464	7.15e-11	2.24e-08	-2.22214	6.84e-15	2.5e-12
ENSG00000137809.12	ITGA11	coding_mRNA	-1.11714	0.000381909	0.00916037	-2.94964	2.95e-10	6.71e-08	-3.72214	1.2e-12	1.6e-10
ENSG00000213275.2	IFITM9P	pseudogene	-1.11429	1.09e-05	0.000534237	-1.56179	9.68e-08	6.79e-06	-2.15679	8.89e-11	6.42e-09
ENSG00000070540.8	WIPI1	coding_mRNA	-1.11393	7.69e-06	0.000397298	-1.63393	5.04e-07	2.7e-05	-1.54643	3.28e-08	1.03e-06
ENSG00000162909.13	CAPN2	coding_mRNA	-1.11286	2.75e-08	3.79e-06	-0.720357	3.98e-05	0.00103465	-1.43536	7.83e-11	5.73e-09
ENSG00000155130.5	MARCKS	coding_mRNA	-1.10929	1.86e-07	1.83e-05	-1.41179	1.15e-07	7.82e-06	-2.59679	1.46e-14	4.68e-12
ENSG00000111450.9	STX2	coding_mRNA	-1.10643	1.24e-06	8.77e-05	-1.39393	4.62e-07	2.51e-05	-1.90643	5.44e-11	4.19e-09
ENSG00000118762.3	PKD2	coding_mRNA	-1.10536	2.27e-06	0.000145217	-1.18786	3.63e-06	0.000142376	-1.37786	6.21e-08	1.81e-06
ENSG00000152977.5	ZIC1	coding_mRNA	-1.10429	0.000122743	0.00374878	-1.46179	3.42e-06	0.000135738	-1.27179	1.13e-05	0.000171903
ENSG00000168461.8	RAB31	coding_mRNA	-1.10143	4.22e-05	0.00160092	-0.926429	0.000261329	0.0048154	-1.41643	2.74e-07	6.6e-06
ENSG00000074527.7	NTN4	coding_mRNA	-1.10036	0.000160747	0.00466939	-2.86036	3.98e-10	8.21e-08	-3.47786	7.73e-13	1.11e-10
ENSG00000122642.6	FKBP9	coding_mRNA	-1.1	3.52e-07	3.09e-05	-1.7425	4.11e-10	8.34e-08	-1.71	9.35e-11	6.72e-09
ENSG00000160789.15	LMNA	coding_mRNA	-1.09857	3.66e-07	3.18e-05	-0.973571	2.41e-05	0.000693554	-0.833571	2.6e-05	0.000353188
ENSG00000198189.6	HSD17B11	coding_mRNA	-1.0975	1.73e-05	0.00076285	-1.185	3.1e-05	0.000850967	-2.1625	2.03e-10	1.27e-08
ENSG00000151617.11	EDNRA	coding_mRNA	-1.0975	7.57e-06	0.000392238	-2.685	2.98e-12	2.07e-09	-0.975	3.21e-05	0.00042309
ENSG00000151789.5	ZNF385D	coding_mRNA	-1.09643	0.000565117	0.0123738	-1.95143	1.19e-07	8.07e-06	-2.76143	1.08e-10	7.56e-09
ENSG00000100353.13	EIF3D	coding_mRNA	-1.095	3.58e-06	0.000211062	-0.955	8.46e-05	0.00191705	-1.105	2.45e-06	4.58e-05
ENSG00000173262.7	SLC2A14	coding_mRNA	-1.08893	3.25e-06	0.000194218	-1.08393	2.64e-06	0.000109111	-2.39393	1.1e-12	1.49e-10
ENSG00000087245.8	MMP2	coding_mRNA	-1.08643	4.15e-10	1.33e-07	-0.943929	3.98e-08	3.31e-06	-1.76393	4.37e-15	1.76e-12
ENSG00000166949.11	SMAD3	coding_mRNA	-1.08607	3.43e-06	0.000204299	-1.11857	3.04e-06	0.000123921	-2.10607	4.65e-11	3.66e-09
ENSG00000224259.1	RP11-48O20.4	lncRNA_intergenic	-1.085	0.00017031	0.00489162	-1.5325	1.21e-05	0.00038711	-1.7575	8.73e-08	2.43e-06
ENSG00000234741.3	GAS5	lncRNA_divergent	-1.085	0.000190165	0.00534648	-1.65	9.39e-07	4.54e-05	-2.6475	3.32e-10	1.91e-08
ENSG00000205413.3	SAMD9	coding_mRNA	-1.08286	2.09e-05	0.000895602	-1.43036	4.12e-07	2.29e-05	-1.87036	1.28e-08	4.56e-07
ENSG00000123131.8	PRDX4	coding_mRNA	-1.08214	2.48e-07	2.31e-05	-0.884643	2.06e-05	0.000606127	-1.13964	2.78e-07	6.69e-06
ENSG00000167460.10	TPM4	coding_mRNA	-1.08036	9.25e-07	6.85e-05	-1.77536	2.74e-09	3.64e-07	-2.06036	6.69e-12	6.91e-10
ENSG00000166073.4	GPR176	coding_mRNA	-1.08	6.57e-05	0.00227975	-2.0025	5.53e-09	6.28e-07	-2.125	1.14e-09	5.57e-08
ENSG00000174501.10	ANKRD36C	coding_mRNA	-1.07929	3.46e-06	0.000205535	-1.36429	8.19e-08	5.95e-06	-0.506786	0.00518106	0.0321137
ENSG00000059573.4	ALDH18A1	coding_mRNA	-1.07821	1.34e-06	9.32e-05	-1.17071	7.97e-07	3.94e-05	-0.953214	5.4e-06	9.05e-05
ENSG00000111424.6	VDR	coding_mRNA	-1.07821	3.8e-06	0.000222186	-1.20821	1.78e-06	7.85e-05	-2.84071	7.28e-14	1.64e-11
ENSG00000163697.12	APBB2	coding_mRNA	-1.07536	2.46e-06	0.000154761	-0.602857	0.00243473	0.0284717	-0.605357	0.00248442	0.0176187
ENSG00000166482.7	MFAP4	coding_mRNA	-1.07464	1.24e-07	1.33e-05	-1.66464	1.35e-10	3.58e-08	-1.83964	3.34e-12	3.83e-10
ENSG00000166033.7	HTRA1	coding_mRNA	-1.07321	2.79e-09	5.95e-07	-0.888214	8.03e-07	3.96e-05	-0.910714	8.34e-08	2.34e-06
ENSG00000100596.2	SPTLC2	coding_mRNA	-1.07321	5.89e-07	4.75e-05	-0.905714	1.43e-05	0.000443777	-1.17821	1.3e-07	3.45e-06
ENSG00000173706.8	HEG1	coding_mRNA	-1.0725	0.000107629	0.00338031	-2.2275	1.55e-09	2.27e-07	-2.0875	3.85e-09	1.62e-07
ENSG00000067057.12	PFKP	coding_mRNA	-1.07107	7.9e-07	5.98e-05	-0.861071	5.37e-05	0.00132306	-0.813571	3.74e-05	0.000484642
ENSG00000223722.2	RP11-467L13.5	pseudogene	-1.07071	2.62e-05	0.00108276	-1.60071	2e-07	1.25e-05	-2.03071	2.45e-10	1.48e-08
ENSG00000128641.13	MYO1B	coding_mRNA	-1.06786	2.32e-06	0.00014769	-2.01036	1.24e-10	3.35e-08	-2.27536	1.65e-12	2.11e-10
ENSG00000168615.7	ADAM9	coding_mRNA	-1.06071	1.95e-05	0.000847175	-0.933214	0.000225309	0.00427728	-1.11821	7.3e-06	0.000117568
ENSG00000181467.2	RAP2B	coding_mRNA	-1.05357	4.52e-06	0.000254211	-1.04357	1.71e-05	0.000517058	-1.62357	4.73e-09	1.94e-07
ENSG00000137962.8	ARHGAP29	coding_mRNA	-1.05071	4.21e-08	5.45e-06	-0.780714	1.41e-05	0.000438467	-1.46821	1.06e-10	7.45e-09
ENSG00000164615.3	CAMLG	coding_mRNA	-1.04893	1.76e-06	0.000117156	-0.988929	3.11e-05	0.000850967	-0.756429	5.61e-05	0.000685392
ENSG00000196159.7	FAT4	coding_mRNA	-1.04893	4.5e-05	0.00168399	-1.94393	8.42e-09	8.95e-07	-0.591429	0.00827094	0.0467184
ENSG00000166734.14	CASC4	coding_mRNA	-1.04857	1.28e-07	1.37e-05	-1.27607	8.45e-08	6.09e-06	-0.681071	0.000186985	0.00193742
ENSG00000199593.1	SNORD114-14	small_RNA	-1.04857	3.89e-06	0.000225987	-1.01107	1.07e-05	0.000352676	-1.29857	1.77e-07	4.57e-06
ENSG00000137573.9	SULF1	coding_mRNA	-1.04786	1.93e-05	0.000842802	-0.747857	0.000877061	0.0129018	-2.33786	8.82e-12	8.74e-10
ENSG00000143797.7	MBOAT2	coding_mRNA	-1.03643	5.73e-06	0.000309971	-1.42893	2.25e-07	1.38e-05	-2.23643	1.09e-11	1.04e-09
ENSG00000141510.11	TP53	coding_mRNA	-1.03571	8.3e-05	0.00273925	-1.21571	1.25e-05	0.000396832	-1.10821	2.47e-05	0.000338364
ENSG00000179820.11	MYADM	coding_mRNA	-1.035	8.49e-06	0.000430258	-0.9625	5.13e-05	0.00127582	-0.855	8.82e-05	0.00100876
ENSG00000136826.10	KLF4	coding_mRNA	-1.03464	0.000111225	0.00345733	-1.07464	0.000109622	0.00237063	-2.01464	8.39e-10	4.26e-08
ENSG00000170370.10	EMX2	coding_mRNA	-1.03036	1.21e-05	0.000577668	-1.01286	4.78e-05	0.00120089	-2.21786	1.54e-11	1.43e-09
ENSG00000134363.7	FST	coding_mRNA	-1.03	7.59e-05	0.00254998	-1.4025	4.25e-06	0.000161134	-3.2775	1.28e-13	2.54e-11
ENSG00000166780.6	C16orf45	coding_mRNA	-1.02929	1.18e-05	0.00056603	-1.46679	1.92e-07	1.21e-05	-1.42929	2.04e-08	6.77e-07
ENSG00000154447.10	SH3RF1	coding_mRNA	-1.02643	3.08e-05	0.00123255	-1.20393	4.11e-06	0.00015704	-1.70393	6.23e-09	2.46e-07
ENSG00000140044.8	JDP2	coding_mRNA	-1.02643	0.000847691	0.0169538	-2.39143	1.38e-08	1.36e-06	-2.93143	1e-10	7.13e-09
ENSG00000201839.1	SNORD114-3	small_RNA	-1.02607	8.55e-06	0.000432744	-0.926071	4.62e-05	0.00117236	-1.09107	1.11e-05	0.000169926
ENSG00000153823.14	PID1	coding_mRNA	-1.025	1.17e-05	0.000562225	-0.6875	0.00208451	0.0252388	-0.665	0.00151949	0.0117068
ENSG00000112210.7	RAB23	coding_mRNA	-1.02	2.17e-05	0.000921459	-1.315	1.59e-06	7.14e-05	-1.6575	1.46e-08	5.12e-07
ENSG00000181804.10	SLC9A9	coding_mRNA	-1.01786	3.24e-05	0.00128157	-1.08786	2.11e-05	0.000620762	-1.13036	7.65e-06	0.000122224
ENSG00000139192.7	TAPBPL	coding_mRNA	-1.0175	3.72e-05	0.00144656	-0.93	0.000142105	0.00293931	-1.165	5.1e-06	8.61e-05
ENSG00000224032.2	EPB41L4A-AS1	lncRNA_antisense	-1.01607	4.55e-05	0.00170219	-1.60357	2.7e-08	2.38e-06	-3.06607	2.05e-14	6.27e-12
ENSG00000238741.1	SCARNA7	small_RNA	-1.01179	3.52e-05	0.00138254	-0.804286	0.000470711	0.0077581	-1.11179	3.49e-06	6.23e-05
ENSG00000122545.13	SEPT7	coding_mRNA	-1.00857	2.19e-07	2.1e-05	-1.51107	4.03e-10	8.28e-08	-1.66607	4.29e-11	3.44e-09
ENSG00000138382.9	METTL5	coding_mRNA	-1.00821	3.05e-06	0.000185208	-0.608214	0.00314524	0.034789	-0.773214	7.41e-05	0.000871483
ENSG00000049860.9	HEXB	coding_mRNA	-1.00679	7.81e-08	9.15e-06	-1.19429	6.62e-08	4.99e-06	-1.53179	3.14e-11	2.62e-09
ENSG00000120254.11	MTHFD1L	coding_mRNA	-1.00643	8.58e-06	0.000432836	-0.996429	3.44e-05	0.000924172	-2.11393	1.03e-11	9.89e-10
ENSG00000109814.7	UGDH	coding_mRNA	-1.00536	4.21e-06	0.000239852	-1.36286	2.25e-07	1.38e-05	-1.40036	1.61e-08	5.55e-07
ENSG00000106105.9	GARS	coding_mRNA	-1.00107	3.22e-08	4.3e-06	-1.34607	1.07e-09	1.71e-07	-1.57857	5.58e-12	5.93e-10
ENSG00000106080.6	FKBP14	coding_mRNA	-1.00071	0.000261908	0.00684831	-1.01571	0.00042867	0.00722267	-1.12571	6.43e-05	0.000772131
ENSG00000145675.10	PIK3R1	coding_mRNA	-0.998571	4.97e-07	4.07e-05	-1.44107	2.07e-09	2.88e-07	-1.96357	1.91e-12	2.39e-10
ENSG00000042493.11	CAPG	coding_mRNA	-0.998214	9.51e-05	0.00306933	-0.698214	0.000961569	0.0139112	-1.11571	2.6e-06	4.82e-05
ENSG00000138594.8	TMOD3	coding_mRNA	-0.9975	1.3e-06	9.13e-05	-0.88	1.15e-05	0.000372994	-1.3625	6.97e-09	2.72e-07
ENSG00000065150.14	IPO5	coding_mRNA	-0.996071	5.37e-05	0.00193566	-0.748571	0.00274437	0.0312381	-1.58357	4.66e-08	1.4e-06
ENSG00000112144.11	ICK	coding_mRNA	-0.995357	9.44e-06	0.000472066	-1.21786	5.71e-07	3e-05	-0.937857	2.77e-05	0.000372514
ENSG00000020181.13	GPR124	coding_mRNA	-0.995	1.45e-05	0.000665663	-1.85	1.4e-09	2.14e-07	-2.365	3.66e-12	4.16e-10
ENSG00000251194.2	RP1-68D18.2	lncRNA_sense_intronic	-0.994286	0.000109909	0.00342617	-0.684286	0.00437655	0.0445391	-1.81679	1.72e-08	5.86e-07
ENSG00000170989.8	S1PR1	coding_mRNA	-0.993929	6.61e-06	0.000352568	-1.71643	5.18e-08	4.09e-06	-1.89393	1.91e-10	1.21e-08
ENSG00000148737.11	TCF7L2	coding_mRNA	-0.9925	3.96e-06	0.000228385	-0.935	2.68e-05	0.000757838	-1.2575	9.61e-08	2.63e-06
ENSG00000181163.9	NPM1	coding_mRNA	-0.99	8.7e-06	0.000438528	-1.2075	3.37e-06	0.000134312	-1.24	5.4e-07	1.2e-05
ENSG00000109881.12	CCDC34	coding_mRNA	-0.985357	3.4e-05	0.00133969	-0.620357	0.0053019	0.0514265	-1.79786	7.86e-09	3.01e-07
ENSG00000079819.12	EPB41L2	coding_mRNA	-0.985	9.58e-06	0.0004784	-1.6325	6.79e-09	7.42e-07	-1.1625	8.88e-07	1.88e-05
ENSG00000008256.11	CYTH3	coding_mRNA	-0.985	2.03e-05	0.000873838	-1.2875	3.84e-06	0.000149657	-1.7275	1.35e-09	6.48e-08
ENSG00000166441.8	RPL27A	coding_mRNA	-0.984643	0.00054646	0.0120926	-1.20964	0.000482126	0.00788696	-1.10214	0.000114518	0.00126708
ENSG00000261559.1	RP11-1H8.3	pseudogene	-0.984286	1.89e-05	0.000825353	-0.996786	1.99e-05	0.00058833	-1.37679	9.95e-07	2.07e-05
ENSG00000103494.8	RPGRIP1L	coding_mRNA	-0.983571	0.000582228	0.0126734	-0.876071	0.00187184	0.0232131	-1.07857	0.000193059	0.00199291
ENSG00000116260.12	QSOX1	coding_mRNA	-0.981429	3.2e-05	0.0012702	-1.13643	2.1e-06	8.95e-05	-2.13143	2.49e-11	2.14e-09
CATG00000047599.1	CATG00000047599.1	coding_mRNA	-0.979286	2.69e-05	0.00110575	-1.14679	5.87e-05	0.00142347	-1.54179	2.14e-07	5.36e-06
ENSG00000183298.4	RP11-556K13.1	pseudogene	-0.978929	0.000438402	0.0102397	-1.13893	0.000108676	0.0023563	-1.44393	3.82e-06	6.7e-05
ENSG00000213186.3	TRIM59	coding_mRNA	-0.978571	0.000401535	0.00954061	-1.03857	0.000353516	0.00615276	-1.89107	7.06e-09	2.75e-07
ENSG00000102024.13	PLS3	coding_mRNA	-0.978214	2.62e-07	2.41e-05	-1.06071	2.87e-07	1.72e-05	-1.57821	6.9e-10	3.6e-08
ENSG00000168297.11	PXK	coding_mRNA	-0.9775	4.95e-07	4.06e-05	-0.845	8.94e-06	0.000302673	-1.7275	3.13e-11	2.62e-09
ENSG00000196628.9	TCF4	coding_mRNA	-0.975714	1.12e-05	0.000541714	-1.22321	6.09e-07	3.16e-05	-1.76571	5.08e-10	2.77e-08
ENSG00000104341.12	LAPTM4B	coding_mRNA	-0.975714	7.96e-05	0.00264774	-1.11321	5.21e-05	0.00129028	-2.04071	4.23e-10	2.39e-08
ENSG00000204381.7	LAYN	coding_mRNA	-0.975	0.000261518	0.0068435	-1.015	7.68e-05	0.00177755	-1.67	2.79e-08	8.94e-07
ENSG00000204634.8	TBC1D8	coding_mRNA	-0.974286	3.13e-05	0.00125145	-1.40179	1.97e-07	1.24e-05	-1.28429	1.76e-06	3.44e-05
ENSG00000006327.9	TNFRSF12A	coding_mRNA	-0.973571	5.1e-06	0.000281499	-0.661071	0.00201411	0.0246103	-1.35607	7.81e-08	2.21e-06
ENSG00000163430.5	FSTL1	coding_mRNA	-0.973571	2.05e-05	0.000879475	-1.90107	8.04e-10	1.38e-07	-2.38107	5.58e-12	5.93e-10
ENSG00000144749.9	LRIG1	coding_mRNA	-0.969643	9.32e-08	1.06e-05	-0.974643	2.19e-07	1.35e-05	-0.527143	0.000351303	0.00334603
ENSG00000177410.8	ZFAS1	lncRNA_divergent	-0.9675	0.000127533	0.00384915	-1.63	2.31e-07	1.41e-05	-2.1725	5.15e-10	2.8e-08
ENSG00000100490.5	CDKL1	coding_mRNA	-0.966071	6.04e-05	0.0021201	-0.851071	0.000349227	0.00609407	-0.738571	0.00151611	0.0116834
ENSG00000138829.6	FBN2	coding_mRNA	-0.965357	2.97e-05	0.00119901	-3.39536	1.97e-15	6.32e-12	-3.04786	3.21e-14	8.76e-12
ENSG00000151881.10	C5orf28	coding_mRNA	-0.964643	1.6e-05	0.000717757	-1.20214	7.54e-06	0.000262343	-1.57714	4.72e-09	1.94e-07
ENSG00000100320.18	RBFOX2	coding_mRNA	-0.963571	3.13e-06	0.000188655	-1.18607	1.51e-07	9.94e-06	-1.08107	1.78e-07	4.58e-06
ENSG00000170734.7	POLH	coding_mRNA	-0.962857	2.6e-05	0.00107415	-0.950357	7.59e-05	0.00176201	-1.59036	5.22e-08	1.55e-06
ENSG00000026103.15	FAS	coding_mRNA	-0.961071	7.12e-06	0.000373096	-0.851071	5.14e-05	0.00127582	-1.45357	5.6e-09	2.23e-07
ENSG00000141753.5	IGFBP4	coding_mRNA	-0.960357	9.18e-06	0.000460522	-1.16786	4.6e-07	2.51e-05	-1.71786	1.82e-10	1.17e-08
ENSG00000145555.10	MYO10	coding_mRNA	-0.956786	0.000228492	0.00614959	-0.964286	0.000102548	0.00224835	-1.60929	3.46e-08	1.07e-06
ENSG00000187193.8	MT1X	coding_mRNA	-0.955357	0.000126343	0.00382364	-2.34286	3.08e-09	3.96e-07	-1.76286	7.58e-09	2.92e-07
ENSG00000178695.4	KCTD12	coding_mRNA	-0.955	4.11e-05	0.00157176	-0.91	9.85e-05	0.00217605	-1.5375	4.78e-08	1.44e-06
ENSG00000118257.12	NRP2	coding_mRNA	-0.953929	0.000186056	0.00525481	-1.88393	5.62e-09	6.34e-07	-2.72393	5.58e-12	5.93e-10
ENSG00000111799.16	COL12A1	coding_mRNA	-0.953214	7.84e-06	0.000402458	-1.73321	7.43e-10	1.31e-07	-1.82071	1.34e-10	9.09e-09
ENSG00000116649.5	SRM	coding_mRNA	-0.951071	1.03e-05	0.000510055	-1.00857	9.66e-06	0.000323976	-1.23607	6.06e-07	1.33e-05
ENSG00000106683.10	LIMK1	coding_mRNA	-0.951071	0.000735257	0.0151892	-0.898571	0.00100858	0.0144034	-1.69357	9.88e-07	2.06e-05
ENSG00000004700.11	RECQL	coding_mRNA	-0.95	5.03e-05	0.00183827	-0.7825	0.00348195	0.037491	-0.7525	0.000747714	0.00644274
ENSG00000180879.9	SSR4	coding_mRNA	-0.949643	2.49e-06	0.000155675	-1.19964	1.24e-07	8.36e-06	-0.714643	7.34e-05	0.000864463
ENSG00000225159.1	NPM1P39	pseudogene	-0.949643	2.24e-05	0.000947341	-1.13964	5.23e-06	0.000193119	-1.41464	3.42e-08	1.07e-06
ENSG00000181104.6	F2R	coding_mRNA	-0.949286	0.0001396	0.00415305	-1.62679	9.22e-08	6.54e-06	-0.934286	0.000144887	0.0015565
ENSG00000128274.11	A4GALT	coding_mRNA	-0.946071	5.4e-06	0.000295623	-1.09607	1.59e-06	7.14e-05	-0.921071	2.2e-05	0.000306315
ENSG00000182362.9	YBEY	coding_mRNA	-0.944286	5.53e-05	0.00197448	-0.711786	0.00233035	0.0275434	-0.714286	0.00140644	0.0109763
ENSG00000173559.8	NABP1	coding_mRNA	-0.943929	5.56e-06	0.000303121	-1.35643	3.31e-08	2.83e-06	-1.00143	1.8e-06	3.5e-05
ENSG00000149451.13	ADAM33	coding_mRNA	-0.9425	1.16e-05	0.000558168	-1.0225	8.16e-06	0.000279742	-1.75	2.04e-09	9.25e-08
ENSG00000059804.11	SLC2A3	coding_mRNA	-0.941429	4.92e-05	0.00180253	-1.13893	2.54e-06	0.000105128	-1.83643	4e-09	1.68e-07
ENSG00000163558.8	PRKCI	coding_mRNA	-0.941429	1.54e-05	0.000698583	-1.19643	6.55e-07	3.35e-05	-1.81143	5.86e-10	3.11e-08
ENSG00000142173.10	COL6A2	coding_mRNA	-0.941071	3.25e-08	4.33e-06	-0.838571	6.52e-07	3.34e-05	-1.13107	1.06e-09	5.23e-08
ENSG00000064666.10	CNN2	coding_mRNA	-0.940714	5.44e-05	0.00195159	-2.06071	3.13e-10	6.94e-08	-2.08071	4.28e-11	3.44e-09
ENSG00000197238.3	HIST1H4J	coding_mRNA	-0.940357	3.67e-05	0.00143053	-1.05036	1.64e-05	0.000501841	-0.822857	0.000233087	0.00234426
ENSG00000111962.7	UST	coding_mRNA	-0.937143	0.00018956	0.00533398	-1.05214	2.23e-05	0.000650223	-2.33964	6.49e-12	6.76e-10
ENSG00000175061.13	C17orf76-AS1	lncRNA_antisense	-0.935357	3.9e-05	0.00150667	-1.39786	2.92e-07	1.74e-05	-1.42536	3.32e-08	1.04e-06
ENSG00000136999.4	NOV	coding_mRNA	-0.935357	0.000785301	0.0160044	-2.16786	1.73e-07	1.12e-05	-1.39536	8.97e-06	0.000140581
ENSG00000072274.8	TFRC	coding_mRNA	-0.934286	1.61e-06	0.000108965	-1.72429	4e-11	1.4e-08	-0.499286	0.00239059	0.0170808
ENSG00000166068.8	SPRED1	coding_mRNA	-0.929643	0.000314203	0.007899	-0.934643	0.000316425	0.00561895	-0.919643	0.000237628	0.00238129
ENSG00000148840.6	PPRC1	coding_mRNA	-0.928214	5.86e-05	0.00206547	-0.740714	0.000968584	0.0139883	-0.980714	2.31e-05	0.000319122
ENSG00000197498.8	RPF2	coding_mRNA	-0.926071	7.67e-07	5.85e-05	-0.481071	0.00321304	0.0353977	-0.493571	0.00178719	0.0134407
ENSG00000242952.1	RP11-187O7.1	pseudogene	-0.925	0.000516182	0.0116158	-0.8725	0.00203002	0.024738	-1.275	9.43e-06	0.000146498
ENSG00000136193.12	SCRN1	coding_mRNA	-0.924286	0.000101203	0.00322594	-0.904286	0.000187191	0.00366018	-0.914286	9.41e-05	0.00106866
ENSG00000200279.1	SNORD114-10	small_RNA	-0.924286	0.000150936	0.00442795	-0.761786	0.00272263	0.0310331	-1.08679	1.3e-05	0.000194273
ENSG00000176136.4	MC5R	coding_mRNA	-0.923571	0.00107034	0.02025	-0.786071	0.00473046	0.047014	-0.818571	0.00295823	0.020413
ENSG00000169688.10	MT1B	coding_mRNA	-0.9225	0.00122547	0.0224835	-1.8725	3.94e-08	3.29e-06	-1.87	3.01e-08	9.53e-07
ENSG00000101439.4	CST3	coding_mRNA	-0.922143	3.65e-07	3.18e-05	-0.849643	4.12e-06	0.00015704	-1.22464	2.58e-09	1.14e-07
ENSG00000135069.9	PSAT1	coding_mRNA	-0.917857	0.000308833	0.00780531	-1.23036	1.18e-05	0.000377712	-1.71286	3.47e-08	1.08e-06
ENSG00000225695.1	HNRNPA1P35	pseudogene	-0.9175	4.2e-05	0.00159679	-1.115	7.24e-06	0.000253253	-1.2325	8.71e-07	1.85e-05
ENSG00000102317.13	RBM3	coding_mRNA	-0.916429	0.0003332	0.00826415	-1.16643	0.000467651	0.00771915	-0.643929	0.00802267	0.0456126
ENSG00000125148.6	MT2A	coding_mRNA	-0.916429	2.91e-05	0.00117819	-1.99143	5.03e-10	9.79e-08	-1.65143	2.65e-09	1.17e-07
ENSG00000177733.4	HNRNPA0	coding_mRNA	-0.915	5.54e-06	0.000302753	-1.1925	1.26e-06	5.88e-05	-1.165	1.21e-07	3.23e-06
ENSG00000140443.9	IGF1R	coding_mRNA	-0.914286	3.95e-05	0.00152157	-1.03179	1.67e-05	0.000509174	-2.15429	3.66e-11	3.01e-09
ENSG00000163815.5	CLEC3B	coding_mRNA	-0.912143	0.000395438	0.00942357	-0.829643	0.000525765	0.00845597	-0.894643	0.000743901	0.00641654
ENSG00000214194.4	LINC00998	coding_mRNA	-0.911071	0.000342273	0.0084326	-1.02857	0.000151361	0.00309041	-0.698571	0.00326128	0.0221503
ENSG00000203875.6	SNHG5	lncRNA_intergenic	-0.910357	0.000129036	0.00387689	-1.04536	3.68e-05	0.000971779	-1.58536	2.43e-08	7.88e-07
ENSG00000100522.4	GNPNAT1	coding_mRNA	-0.909643	7.22e-07	5.58e-05	-0.844643	3.52e-06	0.000139344	-1.42714	5.43e-10	2.92e-08
ENSG00000176890.11	TYMS	coding_mRNA	-0.907143	9.83e-06	0.000489198	-0.579643	0.00337459	0.0366794	-1.78464	8.13e-11	5.92e-09
ENSG00000161638.6	ITGA5	coding_mRNA	-0.905	1.66e-05	0.000740312	-0.625	0.00147134	0.0193274	-1.4125	2.13e-08	7.03e-07
ENSG00000083535.11	PIBF1	coding_mRNA	-0.903929	7.11e-05	0.00241687	-0.841429	0.00020458	0.00394453	-1.04393	9.79e-06	0.000151085
ENSG00000092607.9	TBX15	coding_mRNA	-0.903571	2.09e-06	0.000135889	-0.566071	0.000819507	0.0122668	-0.713571	5.85e-05	0.000711368
ENSG00000107317.7	PTGDS	coding_mRNA	-0.902857	6.28e-05	0.00219031	-1.80786	3.83e-09	4.71e-07	-0.992857	1.59e-05	0.000230768
ENSG00000172716.12	SLFN11	coding_mRNA	-0.899286	0.000595576	0.0129132	-1.03429	0.000295133	0.00531937	-1.60179	1.72e-07	4.46e-06
ENSG00000234664.1	HMGN2P5	pseudogene	-0.8975	5.26e-05	0.00190302	-1.6025	4.06e-08	3.36e-06	-1.1525	1.06e-06	2.18e-05
ENSG00000107731.8	UNC5B	coding_mRNA	-0.896786	7.03e-05	0.00240052	-1.03679	0.000140325	0.00290792	-1.28929	2.38e-07	5.86e-06
ENSG00000163584.13	RPL22L1	coding_mRNA	-0.895357	1.22e-05	0.000584179	-0.652857	0.00388607	0.0409403	-1.53786	8.32e-10	4.23e-08
ENSG00000170961.6	HAS2	coding_mRNA	-0.893929	1.45e-06	9.96e-05	-1.27893	2.78e-09	3.68e-07	-1.48143	5.43e-11	4.19e-09
ENSG00000139178.6	C1RL	coding_mRNA	-0.893214	0.000189287	0.00533081	-1.08821	2.08e-05	0.000610799	-1.79071	3.46e-09	1.47e-07
ENSG00000181472.4	ZBTB2	coding_mRNA	-0.8925	4.88e-05	0.0017955	-0.73	0.00121877	0.0165454	-1.3325	1.42e-07	3.74e-06
ENSG00000145293.10	ENOPH1	coding_mRNA	-0.892143	3.96e-05	0.00152325	-0.684643	0.00107137	0.0150061	-0.592143	0.00211928	0.0154985
ENSG00000118503.10	TNFAIP3	coding_mRNA	-0.891429	1.12e-05	0.000543099	-0.868929	2.82e-05	0.000788716	-0.533929	0.00552543	0.0337079
ENSG00000144810.11	COL8A1	coding_mRNA	-0.890714	0.000223444	0.00604207	-1.57071	1.91e-07	1.21e-05	-1.13821	1.78e-05	0.000255377
ENSG00000234498.2	RPL13AP20	pseudogene	-0.888571	5.04e-05	0.00184139	-1.10357	1.77e-06	7.81e-05	-1.46107	1.16e-08	4.19e-07
ENSG00000166147.9	FBN1	coding_mRNA	-0.888571	0.00083898	0.0168675	-2.10107	1.14e-08	1.14e-06	-2.82857	2.63e-11	2.25e-09
ENSG00000164112.8	TMEM155	coding_mRNA	-0.8875	0.000162483	0.00470337	-0.575	0.00506953	0.0497529	-0.8975	3.63e-05	0.000471786
ENSG00000162627.12	SNX7	coding_mRNA	-0.887143	0.000109099	0.00341341	-0.769643	0.00151565	0.0198077	-1.47714	1.82e-08	6.13e-07
ENSG00000184009.5	ACTG1	coding_mRNA	-0.885714	0.000107972	0.00338468	-1.49571	3.28e-07	1.91e-05	-1.42071	1.11e-07	3.01e-06
ENSG00000145216.11	FIP1L1	coding_mRNA	-0.885357	1.96e-05	0.000847175	-0.752857	0.000132025	0.00275653	-1.06536	6.99e-07	1.51e-05
ENSG00000214021.11	TTLL3	coding_mRNA	-0.884643	6.71e-05	0.00231444	-0.729643	0.000505421	0.00816826	-0.837143	0.000109788	0.00121962
ENSG00000145860.7	RNF145	coding_mRNA	-0.882857	4.76e-05	0.00175917	-0.667857	0.000778848	0.0117801	-0.720357	0.000384081	0.0036076
ENSG00000115170.9	ACVR1	coding_mRNA	-0.882143	0.00026708	0.0069497	-0.799643	0.00106736	0.0149687	-1.08964	2.19e-05	0.000305026
ENSG00000197714.4	ZNF460	coding_mRNA	-0.881786	1.49e-05	0.000679019	-0.744286	0.000270153	0.00494786	-0.474286	0.00703294	0.0409731
ENSG00000168938.5	PPIC	coding_mRNA	-0.881071	8.81e-06	0.000443454	-1.08107	3.68e-06	0.000144068	-0.983571	2.81e-06	5.16e-05
ENSG00000167552.9	TUBA1A	coding_mRNA	-0.880714	0.000693774	0.014507	-1.21571	5.94e-05	0.00143811	-1.07321	8.65e-05	0.000992368
ENSG00000152217.12	SETBP1	coding_mRNA	-0.879643	4.33e-05	0.00163604	-1.20714	7.68e-07	3.82e-05	-1.46464	6.26e-08	1.82e-06
ENSG00000112773.11	FAM46A	coding_mRNA	-0.878929	8.05e-06	0.000410106	-1.21643	1.01e-06	4.87e-05	-1.61143	2.08e-10	1.28e-08
ENSG00000133138.15	TBC1D8B	coding_mRNA	-0.877857	6.07e-05	0.00212883	-0.830357	7.16e-05	0.00167566	-0.782857	0.000102925	0.00115301
ENSG00000163938.12	GNL3	coding_mRNA	-0.877143	0.000548865	0.0121297	-1.01464	0.000179608	0.00353895	-1.11214	2.69e-05	0.00036356
ENSG00000010404.13	IDS	coding_mRNA	-0.876786	0.000173218	0.00495455	-0.874286	0.000394779	0.00674323	-0.884286	5.87e-05	0.000712531
ENSG00000186104.6	CYP2R1	coding_mRNA	-0.876786	0.00130762	0.0235602	-0.949286	0.000409234	0.00694445	-1.43429	3.26e-06	5.88e-05
ENSG00000144369.8	FAM171B	coding_mRNA	-0.875	1.44e-05	0.000663098	-0.68	0.000670576	0.0103688	-1.4225	9.58e-09	3.56e-07
ENSG00000199575.1	SNORD114-1	small_RNA	-0.874286	1.1e-05	0.000536957	-0.766786	0.000129028	0.00270074	-1.01429	5.08e-06	8.6e-05
ENSG00000171858.13	RPS21	coding_mRNA	-0.873929	0.000918583	0.0180722	-0.921429	0.000915429	0.0133716	-0.923929	0.000657584	0.0057784
ENSG00000151917.13	BEND6	coding_mRNA	-0.871786	0.00024132	0.0064572	-0.839286	0.000482324	0.00788696	-2.16929	2.89e-10	1.7e-08
ENSG00000146426.13	TIAM2	coding_mRNA	-0.871429	6.59e-05	0.00228429	-1.13643	3.38e-06	0.000134312	-2.15893	5e-11	3.92e-09
ENSG00000135486.13	HNRNPA1	coding_mRNA	-0.870357	2.94e-07	2.66e-05	-1.16786	8.85e-09	9.37e-07	-1.21036	5.53e-10	2.96e-08
ENSG00000254332.1	GS1-44D20.1	pseudogene	-0.870357	7.12e-06	0.000373096	-1.34036	1.01e-07	7.02e-06	-1.83036	6.75e-11	5.05e-09
ENSG00000149591.12	TAGLN	coding_mRNA	-0.867143	0.001273	0.0231563	-2.03464	3.03e-08	2.62e-06	-3.40214	3.83e-13	6.15e-11
ENSG00000144815.10	NXPE3	coding_mRNA	-0.865	0.000306239	0.00775152	-0.84	0.00050462	0.00816326	-1.12	1.08e-05	0.000165389
ENSG00000155254.8	MARVELD1	coding_mRNA	-0.863571	0.000199078	0.00553424	-1.27607	7.74e-07	3.85e-05	-1.84857	2.11e-10	1.3e-08
ENSG00000026297.11	RNASET2	coding_mRNA	-0.863214	0.000273128	0.00705297	-1.01071	1.67e-05	0.000506981	-0.598214	0.00333139	0.0225345
ENSG00000172965.10	MIR4435-1HG	lncRNA_intergenic	-0.861786	0.000349174	0.00855192	-1.24429	2.78e-06	0.000114117	-1.61179	3.51e-08	1.09e-06
ENSG00000213846.3	AC098614.2	pseudogene	-0.861429	0.000900914	0.0178224	-2.02643	1.7e-08	1.62e-06	-2.44643	2.04e-10	1.27e-08
ENSG00000253729.3	PRKDC	coding_mRNA	-0.858929	1.98e-05	0.000857262	-0.838929	5.58e-05	0.00136734	-0.906429	9.31e-06	0.00014515
ENSG00000121060.10	TRIM25	coding_mRNA	-0.858929	1.65e-05	0.000735672	-1.07143	9.18e-07	4.46e-05	-0.766429	4.51e-05	0.000570104
ENSG00000241431.1	RP11-17A4.1	pseudogene	-0.857857	0.000128123	0.00385643	-0.947857	2.68e-05	0.000757838	-1.55286	7.33e-08	2.1e-06
ENSG00000182752.8	PAPPA	coding_mRNA	-0.852143	0.000115936	0.00357372	-1.21964	1.13e-06	5.34e-05	-2.20714	1.6e-11	1.47e-09
ENSG00000109083.9	IFT20	coding_mRNA	-0.851786	0.000145008	0.00428329	-0.814286	0.000420837	0.00710871	-0.919286	0.000102882	0.00115291
ENSG00000151135.5	C12orf23	coding_mRNA	-0.851786	0.000269266	0.0069858	-1.11679	3.65e-05	0.000965321	-1.39429	2.58e-07	6.28e-06
ENSG00000162745.6	OLFML2B	coding_mRNA	-0.850357	0.000525845	0.0117589	-2.57786	3.44e-11	1.23e-08	-1.43036	5.64e-07	1.25e-05
ENSG00000213064.5	SFT2D2	coding_mRNA	-0.85	1.42e-05	0.000653865	-0.8725	2.26e-05	0.00065882	-0.6925	0.000203956	0.00208854
ENSG00000145632.10	PLK2	coding_mRNA	-0.85	0.000319078	0.00797334	-1.0125	8.15e-05	0.00185975	-2.3225	1.87e-10	1.19e-08
ENSG00000182220.9	ATP6AP2	coding_mRNA	-0.849643	0.000331571	0.00822989	-0.912143	0.000359519	0.00623117	-1.05714	1.7e-05	0.000244468
ENSG00000091490.6	SEL1L3	coding_mRNA	-0.847857	0.000840826	0.0168675	-1.47536	3.98e-06	0.000153747	-2.22286	6.29e-10	3.3e-08
ENSG00000116729.9	WLS	coding_mRNA	-0.845714	3.14e-05	0.00125342	-1.07321	8.47e-06	0.000288803	-0.740714	0.000151365	0.00161136
ENSG00000107819.9	SFXN3	coding_mRNA	-0.843214	0.000143646	0.00425437	-0.790714	0.00076776	0.0116442	-1.20821	1.49e-06	2.95e-05
ENSG00000163359.11	COL6A3	coding_mRNA	-0.8425	3.83e-06	0.000223729	-1.0825	1.34e-07	8.91e-06	-1.1675	1.31e-08	4.64e-07
ENSG00000109320.7	NFKB1	coding_mRNA	-0.840357	2.74e-05	0.00112149	-1.06786	4.21e-06	0.000160574	-1.40036	1.08e-08	3.94e-07
ENSG00000037965.4	HOXC8	coding_mRNA	-0.839643	4.34e-05	0.00163703	-1.17714	1.41e-06	6.43e-05	-1.23464	1.85e-07	4.74e-06
ENSG00000230330.1	HMGN2P3	pseudogene	-0.839643	2.2e-05	0.000930939	-1.41214	5.99e-08	4.58e-06	-1.05464	7.59e-07	1.63e-05
ENSG00000260549.1	MT1L	pseudogene	-0.839643	0.000478221	0.0109392	-2.18464	9.69e-10	1.61e-07	-1.87964	2.11e-09	9.54e-08
ENSG00000164442.8	CITED2	coding_mRNA	-0.838214	7.14e-06	0.000373389	-1.45571	8.96e-09	9.46e-07	-2.58571	2.78e-15	1.3e-12
ENSG00000168542.8	COL3A1	coding_mRNA	-0.8375	2.95e-05	0.00119376	-1.38	6.39e-08	4.85e-06	-1.64	4.97e-10	2.72e-08
ENSG00000159216.14	RUNX1	coding_mRNA	-0.836429	0.000185661	0.00525094	-1.12643	2.09e-06	8.92e-05	-2.04393	1.19e-10	8.28e-09
ENSG00000159086.10	PAXBP1	coding_mRNA	-0.835	0.000200323	0.0055449	-0.78	0.000207686	0.00399055	-0.7975	0.000248812	0.00247994
ENSG00000185483.7	ROR1	coding_mRNA	-0.833571	2.21e-05	0.000933934	-0.576071	0.00235943	0.0277947	-1.15857	5.94e-08	1.74e-06
ENSG00000175029.12	CTBP2	coding_mRNA	-0.832857	0.000266081	0.0069302	-1.10536	6.68e-06	0.000235568	-0.937857	8.48e-05	0.00097563
ENSG00000235386.1	RP11-397A15.4	pseudogene	-0.83	0.000299868	0.00763093	-0.9825	4.53e-05	0.0011524	-0.9025	0.000104823	0.00117151
ENSG00000002586.13	CD99	coding_mRNA	-0.829286	4.23e-05	0.00160292	-1.02929	5.69e-06	0.000207404	-0.764286	9.16e-05	0.00104329
ENSG00000165359.10	DDX26B	coding_mRNA	-0.829286	0.00110018	0.0206501	-1.26429	1.8e-05	0.000538919	-0.801786	0.000915945	0.00764283
ENSG00000146112.7	PPP1R18	coding_mRNA	-0.829286	0.000362188	0.00879298	-0.926786	0.000195241	0.00378863	-1.22679	4.51e-06	7.77e-05
ENSG00000215492.5	HNRNPA1P7	pseudogene	-0.8275	1.52e-06	0.000103372	-1.015	2.03e-07	1.27e-05	-1.1275	6.25e-09	2.46e-07
ENSG00000122641.9	INHBA	coding_mRNA	-0.826786	0.00101665	0.0194491	-1.74929	4.87e-08	3.94e-06	-2.38179	1.34e-10	9.1e-09
ENSG00000102034.12	ELF4	coding_mRNA	-0.826071	0.000349841	0.00855568	-1.03857	3.57e-05	0.000947292	-1.82107	4.86e-09	1.98e-07
ENSG00000215386.6	LINC00478	lncRNA_intergenic	-0.823571	0.000252713	0.00668144	-1.03857	1.16e-05	0.000373327	-1.20107	5.53e-07	1.23e-05
ENSG00000159840.11	ZYX	coding_mRNA	-0.823571	2.03e-05	0.000875495	-1.28857	1.82e-08	1.73e-06	-1.41357	1.23e-09	5.97e-08
ENSG00000205362.6	MT1A	coding_mRNA	-0.822143	0.00326014	0.046294	-1.92714	1.78e-07	1.14e-05	-1.78964	4.14e-07	9.56e-06
ENSG00000180198.11	RCC1	coding_mRNA	-0.821429	0.00047897	0.0109436	-0.783929	0.00475467	0.0472201	-1.02393	3.63e-05	0.000471786
ENSG00000079156.12	OSBPL6	coding_mRNA	-0.821429	0.000545791	0.0120859	-0.741429	0.00145369	0.019131	-1.45393	9.14e-08	2.53e-06
ENSG00000228649.4	AC005682.5	lncRNA_intergenic	-0.819286	0.000104429	0.00330162	-0.561786	0.00313793	0.0347429	-1.33179	4.17e-07	9.61e-06
ENSG00000162840.3	MT2P1	pseudogene	-0.818571	0.000217816	0.00592361	-1.53107	5.16e-08	4.09e-06	-1.69857	9.5e-09	3.53e-07
ENSG00000145819.11	ARHGAP26	coding_mRNA	-0.817857	0.000569602	0.0124638	-1.29536	3.35e-06	0.000133603	-1.49786	2.07e-07	5.23e-06
ENSG00000180354.11	C7orf41	coding_mRNA	-0.8175	0.000130916	0.00392275	-0.8825	0.000266343	0.00488883	-1.0675	1.92e-06	3.7e-05
ENSG00000244716.2	RP11-20O24.4	pseudogene	-0.817143	4.44e-05	0.00166551	-0.694643	0.00117011	0.0160353	-0.897143	9.24e-06	0.000144203
ENSG00000147905.13	ZCCHC7	coding_mRNA	-0.815714	7.93e-05	0.00264049	-0.773214	0.000211911	0.00405533	-0.768214	5.63e-05	0.000686991
ENSG00000076003.4	MCM6	coding_mRNA	-0.815	0.00128725	0.0232811	-1.0925	7.61e-05	0.00176432	-0.68	0.00546926	0.0334328
ENSG00000125991.14	ERGIC3	coding_mRNA	-0.813929	0.000620031	0.0133133	-0.713929	0.0023658	0.0278438	-0.671429	0.00304064	0.0208864
ENSG00000168028.9	RPSA	coding_mRNA	-0.813214	8.73e-05	0.00286231	-0.950714	1.72e-05	0.000517453	-1.24071	1.61e-07	4.2e-06
ENSG00000068650.14	ATP11A	coding_mRNA	-0.810357	0.00056019	0.0122902	-0.945357	0.000112286	0.00242193	-1.22536	2.01e-06	3.85e-05
ENSG00000180172.5	RPS12P23	pseudogene	-0.809286	0.000477085	0.0109358	-0.726786	0.00235245	0.0277456	-0.981786	4.02e-05	0.00051544
ENSG00000164951.11	PDP1	coding_mRNA	-0.808571	0.000206896	0.00568707	-1.13857	6.19e-06	0.000221408	-1.47607	2.83e-08	9.03e-07
ENSG00000136928.4	GABBR2	coding_mRNA	-0.808214	0.000390682	0.00934826	-1.13071	1.85e-06	8.09e-05	-2.05821	5.47e-11	4.2e-09
ENSG00000197608.7	ZNF841	coding_mRNA	-0.806786	8.4e-05	0.00276299	-0.766786	0.000212936	0.00406911	-0.754286	0.000140686	0.00151627
ENSG00000135052.12	GOLM1	coding_mRNA	-0.806786	0.000612852	0.0131932	-0.781786	0.00300875	0.0334909	-0.926786	0.00013863	0.00149897
ENSG00000162704.11	ARPC5	coding_mRNA	-0.806786	0.00153843	0.0264299	-1.20179	7.76e-05	0.00179332	-1.58179	2.23e-07	5.53e-06
ENSG00000140199.7	SLC12A6	coding_mRNA	-0.806429	0.000183461	0.00519313	-0.661429	0.00165581	0.0211816	-0.696429	0.000910268	0.00760542
ENSG00000006652.9	IFRD1	coding_mRNA	-0.802857	5.36e-05	0.00193388	-0.777857	0.000166873	0.00334752	-1.27786	4.01e-08	1.23e-06
ENSG00000115993.7	TRAK2	coding_mRNA	-0.801429	4.77e-05	0.00175917	-0.891429	6.38e-05	0.00153151	-0.691429	0.000292057	0.00285365
ENSG00000171988.13	JMJD1C	coding_mRNA	-0.800714	0.000146551	0.00432501	-0.783214	0.00031456	0.0055918	-1.48071	1.34e-08	4.75e-07
ENSG00000213977.3	TAX1BP3	coding_mRNA	-0.800357	0.000442454	0.0103198	-0.917857	3.46e-05	0.000927933	-1.48036	3.38e-08	1.05e-06
ENSG00000113369.4	ARRDC3	coding_mRNA	-0.800357	0.000114686	0.00354175	-1.32286	2.25e-07	1.38e-05	-1.34036	2.07e-07	5.23e-06
ENSG00000128510.6	CPA4	coding_mRNA	-0.799286	0.000753059	0.0154801	-0.724286	0.00206289	0.0250316	-1.07429	3.88e-05	0.000499447
ENSG00000169122.7	FAM110B	coding_mRNA	-0.799286	0.000329998	0.00819696	-1.04929	1.24e-05	0.000395739	-1.69429	4.24e-09	1.76e-07
ENSG00000120868.9	APAF1	coding_mRNA	-0.798929	0.000352716	0.00861966	-0.918929	0.000133735	0.00278873	-1.38643	2.23e-07	5.53e-06
ENSG00000226419.2	RP11-31F15.1	lncRNA_divergent	-0.798571	0.000292258	0.0074601	-0.658571	0.0010833	0.0151011	-0.853571	6.56e-05	0.00078428
ENSG00000101199.8	ARFGAP1	coding_mRNA	-0.796786	0.000538087	0.0119753	-0.899286	0.000174865	0.00346191	-0.916786	5.56e-05	0.000680755
ENSG00000113758.9	DBN1	coding_mRNA	-0.796786	0.000160927	0.00467054	-1.14179	1.31e-05	0.000412141	-1.88929	2.96e-10	1.73e-08
ENSG00000140682.14	TGFB1I1	coding_mRNA	-0.796429	0.000468011	0.0107708	-1.47393	2.11e-07	1.31e-05	-1.67393	5.34e-09	2.16e-07
ENSG00000164244.16	PRRC1	coding_mRNA	-0.794643	0.000116576	0.00358655	-0.984643	2.76e-05	0.000775985	-0.759643	0.000186517	0.00193582
ENSG00000070087.9	PFN2	coding_mRNA	-0.794286	2.05e-05	0.000879475	-1.48429	7.52e-10	1.32e-07	-1.39679	1.51e-09	7.11e-08
ENSG00000115380.14	EFEMP1	coding_mRNA	-0.793571	0.0014689	0.0255741	-2.87607	1.76e-11	7.91e-09	-3.24107	4.84e-13	7.48e-11
ENSG00000198755.6	RPL10A	coding_mRNA	-0.792143	1.72e-06	0.000115161	-0.957143	3.7e-07	2.1e-05	-1.29964	4.45e-10	2.49e-08
ENSG00000128016.4	ZFP36	coding_mRNA	-0.789643	0.000288383	0.00737817	-0.689643	0.00103395	0.0146461	-0.987143	1.32e-05	0.000196754
ENSG00000214223.3	HNRNPA1P10	pseudogene	-0.788214	0.000100774	0.00321666	-0.978214	1.53e-05	0.000473527	-1.15321	9.65e-07	2.02e-05
ENSG00000108061.7	SHOC2	coding_mRNA	-0.787857	5.63e-07	4.55e-05	-0.392857	0.00332066	0.0362353	-0.415357	0.00186647	0.013919
ENSG00000109572.9	CLCN3	coding_mRNA	-0.787143	1.24e-05	0.000589437	-0.607143	0.00054273	0.00865103	-0.917143	1.17e-06	2.38e-05
ENSG00000234648.1	AL162151.3	pseudogene	-0.786071	0.000912559	0.0179915	-1.00607	0.000275443	0.00502812	-1.32607	1.08e-06	2.21e-05
ENSG00000172638.8	EFEMP2	coding_mRNA	-0.785714	1.07e-05	0.000524421	-1.25321	1.04e-08	1.06e-06	-1.52321	6.23e-11	4.72e-09
ENSG00000104408.5	EIF3E	coding_mRNA	-0.785	7.76e-06	0.000399584	-0.605	0.000699242	0.0107508	-0.835	6.91e-06	0.00011221
ENSG00000071082.6	RPL31	coding_mRNA	-0.783929	2.46e-05	0.00102575	-0.818929	9.36e-05	0.00208098	-1.08393	3.33e-07	7.85e-06
ENSG00000163479.9	SSR2	coding_mRNA	-0.783571	0.000555804	0.0122424	-0.953571	0.000116365	0.00249215	-1.17107	2.65e-06	4.89e-05
ENSG00000242247.6	ARFGAP3	coding_mRNA	-0.783214	0.00130861	0.0235602	-0.885714	0.000590921	0.00932796	-1.26321	3.09e-06	5.61e-05
ENSG00000049239.8	H6PD	coding_mRNA	-0.781429	0.000122997	0.00375237	-0.881429	2.32e-05	0.000669748	-1.02143	3.6e-06	6.38e-05
ENSG00000060982.10	BCAT1	coding_mRNA	-0.781071	0.000302523	0.00768673	-0.958571	1.97e-05	0.000584033	-1.53857	5.06e-09	2.06e-07
ENSG00000144857.10	BOC	coding_mRNA	-0.780357	0.000216298	0.00588712	-0.672857	0.00115677	0.015905	-0.702857	0.000826868	0.00701214
ENSG00000066629.12	EML1	coding_mRNA	-0.780357	0.00034518	0.00847909	-0.562857	0.00456638	0.0459122	-1.23036	1.86e-07	4.76e-06
ENSG00000157240.2	FZD1	coding_mRNA	-0.78	0.00133592	0.023927	-0.88	0.00102473	0.0145497	-2.085	1.31e-09	6.29e-08
ENSG00000114450.5	GNB4	coding_mRNA	-0.778929	0.000118083	0.00362309	-1.24143	5.37e-07	2.86e-05	-1.72643	3.53e-10	2.02e-08
ENSG00000144048.6	DUSP11	coding_mRNA	-0.778214	0.000515105	0.0115995	-0.940714	7.52e-05	0.00174959	-1.22071	3.57e-06	6.34e-05
ENSG00000162636.11	FAM102B	coding_mRNA	-0.776786	4.89e-05	0.00179654	-0.854286	7.98e-05	0.00183016	-1.98929	5.56e-12	5.93e-10
ENSG00000265681.2	RPL17	coding_mRNA	-0.775357	4.67e-05	0.00173243	-0.735357	0.00040799	0.00692687	-0.807857	2.29e-05	0.000317632
ENSG00000243678.7	NME1-NME2	coding_mRNA	-0.774643	5.18e-05	0.0018798	-0.814643	4.7e-05	0.00118631	-1.06714	6.11e-07	1.34e-05
ENSG00000229251.2	HNRNPA1P8	pseudogene	-0.773571	0.000540161	0.0120017	-1.06357	1.76e-05	0.000527505	-1.52857	2.76e-08	8.86e-07
ENSG00000166444.13	ST5	coding_mRNA	-0.7725	0.000727652	0.0150517	-0.765	0.000226594	0.00429187	-1.0075	2.89e-05	0.000387463
ENSG00000033170.12	FUT8	coding_mRNA	-0.771786	2.68e-05	0.00110298	-1.65179	5.43e-10	1.04e-07	-1.73679	3.73e-11	3.06e-09
ENSG00000137845.10	ADAM10	coding_mRNA	-0.771429	4.27e-05	0.00161485	-1.14143	3.17e-06	0.000128437	-1.50643	1.22e-09	5.94e-08
ENSG00000177409.7	SAMD9L	coding_mRNA	-0.77	0.000993103	0.0191629	-1.415	1.78e-06	7.85e-05	-1.5225	8.48e-08	2.37e-06
ENSG00000145592.9	RPL37	coding_mRNA	-0.769643	0.000784261	0.0160028	-0.852143	0.000855039	0.0126795	-1.09714	1.53e-05	0.000223023
ENSG00000196876.9	SCN8A	coding_mRNA	-0.768214	0.000303746	0.00770015	-0.825714	0.000146425	0.00300809	-1.61321	3.38e-09	1.44e-07
ENSG00000169410.5	PTPN9	coding_mRNA	-0.7675	0.000477917	0.0109392	-1.095	5.92e-06	0.000213882	-0.8175	0.000186841	0.00193674
ENSG00000172667.6	ZMAT3	coding_mRNA	-0.767143	9.94e-06	0.000494182	-0.579643	0.00108201	0.0150962	-1.38464	1.08e-09	5.32e-08
ENSG00000071575.7	TRIB2	coding_mRNA	-0.766786	0.00157284	0.0268822	-0.674286	0.00423872	0.0434855	-1.33179	2.76e-06	5.08e-05
ENSG00000103257.4	SLC7A5	coding_mRNA	-0.765	0.000355434	0.0086699	-1.3025	6.13e-07	3.17e-05	-1.76	1.85e-09	8.46e-08
ENSG00000135596.13	MICAL1	coding_mRNA	-0.764643	0.0034303	0.0481604	-0.772143	0.00200608	0.0245356	-0.677143	0.00648213	0.0382451
ENSG00000213614.5	HEXA	coding_mRNA	-0.763929	0.000552242	0.0121801	-0.738929	0.00149275	0.0195622	-0.553929	0.0069371	0.0404928
ENSG00000140650.7	PMM2	coding_mRNA	-0.763571	0.000415688	0.00981249	-0.983571	0.000147599	0.00302846	-0.558571	0.00821448	0.0465044
ENSG00000111860.9	CEP85L	coding_mRNA	-0.763571	0.000405412	0.00961082	-0.751071	0.00102936	0.0145998	-1.36357	5.09e-07	1.15e-05
ENSG00000138172.6	CALHM2	coding_mRNA	-0.763571	0.00193989	0.0316894	-0.818571	0.00181222	0.0226341	-1.28107	7.17e-06	0.000115626
ENSG00000162551.9	ALPL	coding_mRNA	-0.762143	0.00231182	0.0362523	-1.44214	1.64e-06	7.29e-05	-1.54714	3.91e-07	9.12e-06
ENSG00000225492.2	GBP1P1	pseudogene	-0.760714	0.000275063	0.00708095	-0.613214	0.00193934	0.023886	-0.703214	0.000220727	0.00223686
ENSG00000146278.10	PNRC1	coding_mRNA	-0.760357	2.72e-05	0.00111643	-1.25286	4.11e-07	2.29e-05	-1.84036	5.47e-12	5.88e-10
ENSG00000117632.16	STMN1	coding_mRNA	-0.758929	0.000892708	0.0177051	-0.856429	0.000919468	0.0134188	-1.02143	1.98e-05	0.000279216
ENSG00000261105.1	RP11-173B14.5	lncRNA_divergent	-0.758929	0.00295209	0.0430149	-1.41143	1.97e-06	8.52e-05	-2.43143	1.5e-10	9.88e-09
ENSG00000090530.5	LEPREL1	coding_mRNA	-0.757143	0.00084084	0.0168675	-0.844643	0.000439232	0.00736103	-1.30964	1.72e-06	3.36e-05
ENSG00000116191.13	RALGPS2	coding_mRNA	-0.757143	0.000750307	0.0154426	-0.842143	0.000480017	0.00786471	-1.71964	2.39e-09	1.07e-07
ENSG00000214391.3	RP11-121L10.3	pseudogene	-0.753571	0.000799081	0.0162057	-1.08357	3.04e-05	0.000840098	-0.803571	0.000399828	0.00372188
ENSG00000026025.9	VIM	coding_mRNA	-0.752857	1.37e-07	1.42e-05	-0.730357	9.56e-07	4.62e-05	-0.972857	1.43e-09	6.8e-08
ENSG00000115368.5	WDR75	coding_mRNA	-0.752143	6.67e-05	0.00230672	-0.724643	0.000126363	0.00265833	-0.834643	1.2e-05	0.000182141
ENSG00000164106.3	SCRG1	coding_mRNA	-0.752143	0.000303422	0.00769779	-1.21964	3.74e-07	2.11e-05	-1.88964	1.8e-10	1.16e-08
ENSG00000127920.5	GNG11	coding_mRNA	-0.751429	0.0037986	0.0521641	-1.09643	0.000144305	0.00296831	-0.991429	0.000355054	0.00337595
ENSG00000147454.9	SLC25A37	coding_mRNA	-0.749643	0.00140807	0.0248054	-0.747143	0.00105168	0.0147965	-1.07464	1.28e-05	0.000192266
ENSG00000115594.7	IL1R1	coding_mRNA	-0.749286	4.68e-05	0.00173645	-0.691786	0.000373933	0.00644071	-1.43679	2.24e-09	1.01e-07
ENSG00000109846.3	CRYAB	coding_mRNA	-0.748929	0.000385925	0.00924773	-0.868929	0.000261675	0.00481692	-0.503929	0.00745411	0.0429677
ENSG00000148303.12	RPL7A	coding_mRNA	-0.748929	1.84e-05	0.000809138	-0.828929	1.92e-05	0.000571658	-1.23393	5.51e-09	2.21e-07
ENSG00000113739.6	STC2	coding_mRNA	-0.747857	0.000958867	0.0186721	-1.24786	3.85e-07	2.16e-05	-1.93036	3.23e-10	1.87e-08
ENSG00000109534.12	GAR1	coding_mRNA	-0.747143	0.000193999	0.0054222	-0.697143	0.000700566	0.0107575	-0.579643	0.00308349	0.0211458
ENSG00000099256.14	PRTFDC1	coding_mRNA	-0.746429	0.000182796	0.00518063	-0.596429	0.00377102	0.0399883	-1.18643	2.11e-07	5.3e-06
CATG00000063777.1	CATG00000063777.1	uncertain_coding	-0.746429	0.000475184	0.0108997	-0.866429	0.000311835	0.00555226	-0.996429	2.74e-05	0.000369095
ENSG00000151012.9	SLC7A11	coding_mRNA	-0.746071	0.00136553	0.0242227	-2.14107	2.12e-09	2.89e-07	-1.54107	8.48e-08	2.37e-06
ENSG00000087088.15	BAX	coding_mRNA	-0.745	7.52e-05	0.00253431	-0.7025	0.000473934	0.00779005	-1.5425	1.29e-09	6.24e-08
ENSG00000142871.11	CYR61	coding_mRNA	-0.745	0.000833075	0.0168132	-1.76	9.28e-09	9.73e-07	-1.9025	9.36e-10	4.68e-08
ENSG00000182718.12	ANXA2	coding_mRNA	-0.744643	0.00163104	0.0276073	-0.734643	0.00238712	0.028055	-0.849643	0.000722259	0.00625419
ENSG00000196670.9	ZFP62	coding_mRNA	-0.744643	0.000778833	0.0159115	-0.829643	0.000244082	0.00456289	-0.844643	0.000227821	0.00230037
ENSG00000109113.13	RAB34	coding_mRNA	-0.742857	0.000128557	0.00386602	-0.965357	1.36e-05	0.000426919	-1.33036	3.65e-08	1.13e-06
ENSG00000170271.6	FAXDC2	coding_mRNA	-0.742857	0.00180845	0.0299846	-1.20036	1.53e-05	0.000473455	-1.60786	8.56e-08	2.39e-06
ENSG00000221926.7	TRIM16	coding_mRNA	-0.7425	0.00351527	0.049053	-0.7375	0.00225031	0.0268551	-0.595	0.00953237	0.0520516
ENSG00000177426.16	TGIF1	coding_mRNA	-0.740714	6.21e-05	0.00216791	-0.965714	4.34e-06	0.000163763	-1.68321	1.42e-10	9.5e-09
ENSG00000049192.10	ADAMTS6	coding_mRNA	-0.74	0.00201685	0.0325949	-0.8025	0.00123707	0.0167324	-1.2175	3.77e-06	6.63e-05
ENSG00000129474.11	AJUBA	coding_mRNA	-0.74	0.00141028	0.0248179	-1.595	5.11e-08	4.07e-06	-1.765	1.32e-08	4.66e-07
ENSG00000213721.3	HMGN2P30	pseudogene	-0.739286	0.000291004	0.0074338	-0.939286	0.000100122	0.00220241	-0.501786	0.00694202	0.0405073
ENSG00000241741.1	RPL7AP30	pseudogene	-0.737143	6.99e-05	0.0023928	-0.787143	0.000496756	0.00807927	-1.52214	4.77e-10	2.63e-08
ENSG00000218426.5	RP11-475C16.1	pseudogene	-0.736786	5.48e-05	0.00195951	-0.884286	3.9e-05	0.00101593	-1.04929	2.58e-07	6.28e-06
ENSG00000109586.7	GALNT7	coding_mRNA	-0.736429	0.000444028	0.0103492	-0.653929	0.00349486	0.0375813	-1.29393	1.51e-07	3.96e-06
ENSG00000123094.11	RASSF8	coding_mRNA	-0.736429	0.000516987	0.0116255	-0.998929	3.37e-05	0.000907971	-1.09143	3.4e-06	6.09e-05
ENSG00000239269.1	RPSAP4	pseudogene	-0.736071	0.000679793	0.0142944	-0.876071	0.000312353	0.00555851	-1.12607	5.43e-06	9.09e-05
ENSG00000117174.6	ZNHIT6	coding_mRNA	-0.735714	0.000124517	0.00378213	-0.858214	1.07e-05	0.000352477	-0.635714	0.000497537	0.00451393
ENSG00000100968.9	NFATC4	coding_mRNA	-0.735714	0.00314788	0.0450315	-0.853214	0.00177291	0.0222685	-0.925714	0.000369922	0.00349932
ENSG00000075142.9	SRI	coding_mRNA	-0.734286	8.89e-05	0.00290914	-0.654286	0.00102259	0.0145286	-0.591786	0.000957014	0.00793575
ENSG00000140464.15	PML	coding_mRNA	-0.733929	0.00111857	0.0209363	-1.00393	6.41e-05	0.0015375	-1.08143	7.25e-05	0.000857021
ENSG00000226084.4	RP4-706A16.3	pseudogene	-0.731786	5.46e-05	0.00195512	-0.684286	0.000637022	0.00995179	-0.834286	8.6e-06	0.000135454
ENSG00000164484.7	TMEM200A	coding_mRNA	-0.73	5.84e-05	0.00206396	-1.2375	1.29e-07	8.64e-06	-1.56	1.98e-10	1.25e-08
ENSG00000150347.10	ARID5B	coding_mRNA	-0.729643	1.08e-05	0.000528323	-1.21464	4.03e-09	4.91e-07	-1.58464	6.29e-12	6.6e-10
ENSG00000256525.2	POLG2	coding_mRNA	-0.726429	0.000955391	0.0186262	-0.796429	0.000439579	0.00736103	-1.06893	4.98e-06	8.45e-05
ENSG00000139514.8	SLC7A1	coding_mRNA	-0.725714	0.00101288	0.0194294	-1.40571	4.91e-07	2.64e-05	-2.06571	6.11e-11	4.64e-09
ENSG00000056661.9	PCGF2	coding_mRNA	-0.725357	0.00114785	0.021364	-0.945357	7.53e-05	0.00175078	-1.32036	2.77e-07	6.66e-06
ENSG00000134825.9	TMEM258	coding_mRNA	-0.725	9e-05	0.00294202	-0.9525	8.34e-06	0.000285048	-1.2525	2.52e-08	8.17e-07
ENSG00000120690.9	ELF1	coding_mRNA	-0.723214	6.48e-05	0.00224802	-0.500714	0.00451288	0.0455533	-0.645714	0.000224231	0.00226822
ENSG00000118007.8	STAG1	coding_mRNA	-0.722857	0.000159423	0.00463902	-1.29036	8.76e-08	6.27e-06	-1.30036	2.21e-08	7.26e-07
ENSG00000136068.10	FLNB	coding_mRNA	-0.7225	0.000895403	0.0177374	-0.84	0.000388876	0.00666358	-1.1775	4.13e-06	7.17e-05
ENSG00000063177.8	RPL18	coding_mRNA	-0.721786	0.000168668	0.00485287	-0.936786	4.76e-05	0.00119726	-1.02179	9.72e-07	2.03e-05
ENSG00000145687.11	SSBP2	coding_mRNA	-0.721429	0.000355554	0.0086699	-1.04643	1.59e-06	7.13e-05	-2.12143	5.47e-12	5.88e-10
ENSG00000035862.8	TIMP2	coding_mRNA	-0.721071	2.45e-06	0.000154214	-0.941071	2.82e-07	1.7e-05	-0.936071	3.2e-08	1e-06
ENSG00000162734.8	PEA15	coding_mRNA	-0.720357	8.57e-06	0.000432836	-1.06536	4.91e-08	3.95e-06	-1.33786	2.38e-10	1.44e-08
ENSG00000105372.2	RPS19	coding_mRNA	-0.72	9.99e-05	0.00319617	-0.6125	0.00529754	0.0513991	-1.1625	8.82e-08	2.45e-06
ENSG00000164985.10	PSIP1	coding_mRNA	-0.718571	0.00260769	0.0392629	-1.15857	2.12e-05	0.000621939	-1.36357	1.7e-06	3.33e-05
ENSG00000174325.4	DIRC1	coding_mRNA	-0.718571	0.0027646	0.0410311	-1.11357	2.86e-05	0.000798588	-1.50357	2.33e-07	5.75e-06
ENSG00000151491.8	EPS8	coding_mRNA	-0.718214	0.000312453	0.00787057	-1.09571	4.03e-06	0.000154627	-1.06821	1.95e-06	3.74e-05
ENSG00000113272.9	THG1L	coding_mRNA	-0.7175	0.00373098	0.0515762	-0.78	0.00231589	0.0274311	-0.68	0.00430593	0.0276905
ENSG00000104047.10	DTWD1	coding_mRNA	-0.715714	0.000526074	0.0117589	-0.805714	0.000173092	0.00343704	-1.40321	2.11e-08	6.96e-07
ENSG00000213190.2	MLLT11	coding_mRNA	-0.715714	0.00146752	0.0255681	-0.763214	0.00043972	0.00736103	-1.49571	1.14e-08	4.14e-07
ENSG00000188243.8	COMMD6	coding_mRNA	-0.715	0.000143012	0.00423937	-0.7425	0.000151618	0.00309054	-0.575	0.00206955	0.0152084
ENSG00000239719.1	RP4-800G7.1	pseudogene	-0.715	0.000177126	0.00504384	-1.085	8.59e-07	4.21e-05	-1.2025	1.41e-07	3.7e-06
ENSG00000241343.5	RPL36A	coding_mRNA	-0.714643	0.000300183	0.00763309	-0.952143	1.3e-05	0.000411442	-0.917143	1.51e-05	0.000220159
ENSG00000131873.5	CHSY1	coding_mRNA	-0.714643	0.000589556	0.0127994	-0.812143	9.76e-05	0.00215905	-1.31214	4.19e-08	1.28e-06
ENSG00000108298.5	RPL19	coding_mRNA	-0.714286	0.00239952	0.0372587	-0.814286	0.000872385	0.0128672	-0.921786	0.000148827	0.00159157
ENSG00000166128.8	RAB8B	coding_mRNA	-0.713929	0.000159279	0.0046389	-0.631429	0.00113067	0.0156172	-1.10643	2.94e-07	7.02e-06
ENSG00000253605.1	HNRNPA1P38	pseudogene	-0.713214	0.000382004	0.00916037	-0.773214	0.000453904	0.00753335	-0.668214	0.00249236	0.0176487
ENSG00000117228.9	GBP1	coding_mRNA	-0.7125	0.000123086	0.00375237	-0.7	0.000473268	0.00778482	-0.6375	0.00387861	0.0253992
ENSG00000200237.1	SNORA70	small_RNA	-0.710714	0.00287052	0.0421889	-0.685714	0.00335028	0.0364986	-0.590714	0.0090161	0.0497992
ENSG00000161281.6	COX7A1	coding_mRNA	-0.710357	0.000173245	0.00495455	-0.765357	0.000149127	0.00305605	-0.935357	5.48e-06	9.16e-05
ENSG00000213621.3	RPSAP54	pseudogene	-0.710357	0.00152065	0.0262056	-0.747857	0.00216653	0.0260234	-1.10536	1.06e-05	0.000162179
ENSG00000255639.2	RP11-234B24.6	coding_mRNA	-0.709643	0.000422335	0.009921	-1.39214	7.24e-07	3.64e-05	-1.31714	3.14e-07	7.46e-06
ENSG00000149273.10	RPS3	coding_mRNA	-0.709286	0.000860293	0.0171448	-0.891786	0.000181244	0.00356486	-1.14179	1.81e-06	3.51e-05
ENSG00000081377.12	CDC14B	coding_mRNA	-0.708571	0.00328878	0.0466262	-0.791071	0.000298955	0.00537182	-0.618571	0.00211689	0.0154844
ENSG00000240342.2	RPS2P5	pseudogene	-0.708214	1.71e-05	0.000756761	-0.975714	5.98e-07	3.11e-05	-1.10321	4.64e-09	1.9e-07
ENSG00000164099.3	PRSS12	coding_mRNA	-0.7075	0.000519585	0.011653	-0.6825	0.00207752	0.0251725	-1.56	1.04e-08	3.83e-07
ENSG00000011028.9	MRC2	coding_mRNA	-0.706786	0.000427942	0.0100235	-1.00179	6.86e-06	0.00024169	-0.656786	0.000743578	0.00641541
ENSG00000183741.7	CBX6	coding_mRNA	-0.706786	0.00195413	0.0318287	-0.926786	0.00115106	0.0158461	-0.846786	0.000380704	0.00358204
ENSG00000242445.1	RPL7AP11	pseudogene	-0.705357	0.000794544	0.0161433	-0.707857	0.000841999	0.0125639	-1.52786	1.76e-08	5.98e-07
ENSG00000127152.13	BCL11B	coding_mRNA	-0.705	6.03e-05	0.0021201	-0.9275	4.54e-06	0.000170229	-1.305	6.01e-09	2.39e-07
ENSG00000168743.8	NPNT	coding_mRNA	-0.703571	0.00300354	0.0435474	-1.36107	3.25e-07	1.9e-05	-0.916071	8.24e-05	0.000952148
ENSG00000143515.12	ATP8B2	coding_mRNA	-0.703214	0.00062438	0.0133893	-1.38321	1.97e-07	1.24e-05	-1.46071	1.51e-08	5.27e-07
ENSG00000185896.9	LAMP1	coding_mRNA	-0.7025	4.64e-05	0.00172776	-0.9475	3.62e-06	0.000142137	-0.6	0.000183371	0.00190889
ENSG00000224578.3	HNRNPA1P48	pseudogene	-0.7025	1.79e-07	1.77e-05	-0.94	7.52e-09	8.12e-07	-1.01	1.39e-10	9.33e-09
ENSG00000183684.6	ALYREF	coding_mRNA	-0.702143	0.000137389	0.00409826	-0.767143	0.000107801	0.00234343	-0.524643	0.00240757	0.0171837
ENSG00000163453.7	IGFBP7	coding_mRNA	-0.702143	1.4e-05	0.000649387	-2.36714	1.03e-14	2.02e-11	-2.08464	2.77e-14	7.81e-12
ENSG00000178665.10	ZNF713	coding_mRNA	-0.700714	0.00327435	0.0464612	-0.925714	0.00035229	0.00613481	-1.03321	6.32e-05	0.000761531
ENSG00000197989.9	SNHG12	lncRNA_intergenic	-0.699643	0.00100346	0.0193367	-1.11964	8.24e-06	0.000282084	-1.21714	1.11e-06	2.27e-05
ENSG00000198830.6	HMGN2	coding_mRNA	-0.699643	0.00147329	0.0256285	-1.39964	1.82e-06	7.99e-05	-1.05464	1.34e-05	0.00019861
ENSG00000163754.13	GYG1	coding_mRNA	-0.699286	0.000141411	0.00419565	-0.874286	2.4e-05	0.000691177	-1.27929	1.55e-08	5.37e-07
ENSG00000142867.8	BCL10	coding_mRNA	-0.698214	0.000257883	0.00677502	-0.638214	0.000767554	0.0116442	-0.705714	0.00021548	0.00219304
ENSG00000128791.7	TWSG1	coding_mRNA	-0.6975	0.000102161	0.00325155	-0.7275	0.000208327	0.00399999	-0.8125	1.34e-05	0.000198831
ENSG00000215472.5	RPL17-C18orf32	coding_mRNA	-0.697143	3.22e-05	0.00127426	-0.609643	0.000654074	0.0101593	-0.652143	4.98e-05	0.000622249
ENSG00000101224.13	CDC25B	coding_mRNA	-0.696786	0.000221123	0.00599883	-0.856786	0.000279741	0.00509818	-1.29679	1.3e-07	3.44e-06
ENSG00000114251.9	WNT5A	coding_mRNA	-0.696429	0.000726651	0.0150488	-0.948929	5.29e-05	0.00130824	-2.26393	6.39e-11	4.82e-09
ENSG00000204272.6	RP11-622K12.1	lncRNA_intergenic	-0.696071	0.00103797	0.0197947	-0.801071	0.000642148	0.0100084	-1.21107	4.25e-07	9.76e-06
ENSG00000153395.5	LPCAT1	coding_mRNA	-0.696071	0.00111018	0.0207908	-0.901071	2.78e-05	0.000779003	-1.09607	8.87e-06	0.000139175
ENSG00000031698.8	SARS	coding_mRNA	-0.696071	0.00301277	0.0435862	-0.821071	0.00121565	0.0165165	-1.25607	3.72e-06	6.56e-05
ENSG00000176148.11	TCP11L1	coding_mRNA	-0.695714	0.000687302	0.0144225	-0.868214	0.000200008	0.00386985	-1.33821	2.13e-07	5.34e-06
ENSG00000134874.13	DZIP1	coding_mRNA	-0.695357	0.000305645	0.00774239	-0.910357	2.37e-05	0.000683675	-0.570357	0.0016174	0.0123752
ENSG00000179934.5	CCR8	coding_mRNA	-0.695357	0.000191741	0.00537716	-0.880357	0.000154012	0.00312154	-1.16036	2.18e-07	5.45e-06
ENSG00000197062.7	RP5-874C20.3	pseudogene	-0.695	0.000759477	0.0155927	-0.8625	0.000141999	0.00293894	-0.7925	0.000122175	0.00133978
ENSG00000267119.1	RPL10P15	pseudogene	-0.692857	0.000103576	0.00328714	-0.882857	1.79e-05	0.000536755	-0.987857	2.34e-06	4.4e-05
ENSG00000140988.11	RPS2	coding_mRNA	-0.692143	1.9e-06	0.000125018	-1.15964	2.91e-09	3.8e-07	-1.32714	5.46e-12	5.88e-10
ENSG00000184371.9	CSF1	coding_mRNA	-0.692143	7.68e-05	0.00257861	-1.89714	4.9e-12	2.91e-09	-1.25714	5.5e-09	2.21e-07
ENSG00000215840.3	RP11-122G18.7	pseudogene	-0.690714	0.000335681	0.00831554	-0.818214	6.11e-05	0.00147481	-1.00821	1.02e-06	2.11e-05
ENSG00000197958.8	RPL12	coding_mRNA	-0.689643	1.85e-05	0.000813196	-0.942143	8.74e-07	4.28e-05	-1.29464	2.5e-10	1.5e-08
ENSG00000067066.12	SP100	coding_mRNA	-0.688571	0.000316338	0.00793635	-0.843571	4.77e-05	0.00119959	-0.948571	6.02e-06	9.92e-05
ENSG00000106823.8	ECM2	coding_mRNA	-0.687857	0.000779458	0.0159145	-1.34286	1.95e-06	8.42e-05	-0.882857	3.95e-05	0.000507041
ENSG00000070778.8	PTPN21	coding_mRNA	-0.6875	0.000255629	0.00673276	-0.71	0.000418677	0.00708302	-1.0675	8.49e-07	1.81e-05
ENSG00000230191.1	RP4-725G10.3	pseudogene	-0.6875	0.00236768	0.036902	-1.065	3.72e-05	0.000979984	-1.8125	9.23e-09	3.44e-07
ENSG00000213798.3	AC004129.9	pseudogene	-0.686071	0.000371076	0.00896144	-0.598571	0.00219386	0.0263105	-1.33607	6.28e-08	1.82e-06
ENSG00000241127.3	YAE1D1	coding_mRNA	-0.685714	0.000834657	0.0168349	-0.728214	0.00106752	0.0149687	-1.01571	3.52e-06	6.26e-05
ENSG00000226360.4	RPL10AP6	pseudogene	-0.685357	0.000538278	0.0119753	-0.977857	1.63e-05	0.00049763	-1.33036	6.83e-08	1.96e-06
ENSG00000136026.9	CKAP4	coding_mRNA	-0.683929	0.000531779	0.0118705	-1.27143	3.49e-07	2e-05	-1.12643	8.98e-07	1.89e-05
ENSG00000189221.5	MAOA	coding_mRNA	-0.683571	0.00195283	0.0318232	-0.678571	0.00260333	0.030044	-1.29357	1.51e-06	2.99e-05
ENSG00000042429.6	MED17	coding_mRNA	-0.683214	0.00093522	0.0183188	-0.823214	0.000246955	0.00460411	-0.508214	0.00519809	0.0321892
ENSG00000106665.11	CLIP2	coding_mRNA	-0.681786	0.00240321	0.0372811	-0.811786	0.000541266	0.0086509	-0.894286	0.000295528	0.00287805
ENSG00000088280.14	ASAP3	coding_mRNA	-0.680714	0.00382713	0.0523633	-0.733214	0.00367877	0.0391539	-0.675714	0.00446934	0.028584
CATG00000060608.1	CATG00000060608.1	coding_mRNA	-0.680357	0.000688195	0.0144304	-0.572857	0.00410006	0.0423898	-1.16786	1.41e-06	2.82e-05
ENSG00000164237.4	CMBL	coding_mRNA	-0.68	0.000326522	0.00812775	-0.535	0.00407047	0.0422139	-1.035	9.05e-07	1.91e-05
ENSG00000213442.4	RPL18AP3	pseudogene	-0.68	5.83e-05	0.00206361	-1.0475	3.96e-07	2.22e-05	-1.3025	1.46e-09	6.94e-08
ENSG00000224959.1	AC017002.2	sense_overlap_RNA	-0.679286	0.0038746	0.0528586	-0.814286	0.00159765	0.0206601	-1.76679	1.35e-08	4.77e-07
ENSG00000023191.12	RNH1	coding_mRNA	-0.678571	0.00153822	0.0264299	-0.596071	0.00329551	0.0360081	-0.531071	0.0064067	0.0379158
ENSG00000136891.9	TEX10	coding_mRNA	-0.677857	0.000755093	0.0155123	-0.900357	0.000144052	0.00296668	-0.737857	0.000568746	0.00510016
ENSG00000237441.5	RGL2	coding_mRNA	-0.677143	0.00125665	0.022943	-0.632143	0.00321662	0.0354137	-0.657143	0.00212097	0.0155041
ENSG00000105329.5	TGFB1	coding_mRNA	-0.675714	0.000513658	0.0115747	-0.735714	0.000400338	0.00681435	-1.39071	1.76e-08	5.98e-07
ENSG00000182481.4	KPNA2	coding_mRNA	-0.675714	6.34e-05	0.00220784	-0.888214	1.29e-05	0.000408213	-1.16821	1.75e-08	5.96e-07
ENSG00000089060.7	SLC8B1	coding_mRNA	-0.675357	0.000378445	0.00910788	-1.15286	6.19e-07	3.2e-05	-1.13536	6.74e-07	1.46e-05
ENSG00000123009.3	NME2P1	pseudogene	-0.675	0.000208885	0.00572754	-0.5925	0.00150461	0.0197021	-1.1275	1.32e-07	3.5e-06
ENSG00000196576.10	PLXNB2	coding_mRNA	-0.673214	0.000255667	0.00673276	-0.855714	3.22e-05	0.000875387	-1.42821	4.34e-09	1.79e-07
ENSG00000253368.3	TRNP1	coding_mRNA	-0.6725	0.000974241	0.0189161	-1.09	8.05e-06	0.000277508	-1.045	5.21e-06	8.77e-05
ENSG00000251022.2	THAP9-AS1	lncRNA_divergent	-0.672143	0.000660418	0.0139908	-1.06964	4.37e-06	0.000164545	-1.41714	2.88e-08	9.18e-07
ENSG00000105270.10	CLIP3	coding_mRNA	-0.671429	0.00127612	0.0231807	-0.858929	5.69e-05	0.00138879	-0.981429	7.51e-06	0.000120266
ENSG00000162885.8	B3GALNT2	coding_mRNA	-0.671071	0.000657124	0.0139299	-0.771071	0.000191146	0.00373093	-1.06357	5.16e-07	1.16e-05
ENSG00000269893.2	SNHG8	lncRNA_divergent	-0.671071	0.000153385	0.00448688	-0.833571	1.65e-05	0.000502363	-1.41607	9.08e-10	4.57e-08
ENSG00000155966.9	AFF2	coding_mRNA	-0.670714	0.00140904	0.0248092	-1.73071	3.46e-09	4.3e-07	-1.12071	0.000107705	0.00120031
ENSG00000163811.7	WDR43	coding_mRNA	-0.668214	2.14e-05	0.00090951	-0.563214	0.000491401	0.00800785	-0.905714	2.12e-07	5.33e-06
ENSG00000161016.11	RPL8	coding_mRNA	-0.666071	0.000457787	0.0106104	-0.738571	0.000528859	0.00849752	-0.853571	1.9e-05	0.000270531
ENSG00000166086.8	JAM3	coding_mRNA	-0.665714	0.00375217	0.0517615	-1.32571	2.05e-06	8.79e-05	-1.56071	7.02e-08	2.02e-06
ENSG00000082781.7	ITGB5	coding_mRNA	-0.665357	0.00149329	0.0258699	-0.847857	0.000101166	0.00222244	-1.37536	3.2e-08	1e-06
ENSG00000223749.3	MIR503HG	lncRNA_intergenic	-0.665	0.00226308	0.0356846	-0.695	0.00160705	0.0207403	-1.38	3.25e-07	7.67e-06
ENSG00000122884.8	P4HA1	coding_mRNA	-0.664286	5.79e-05	0.00205456	-0.776786	6.79e-05	0.001603	-1.37429	4.76e-10	2.63e-08
ENSG00000225544.1	KB-1027C11.4	pseudogene	-0.663571	0.0025047	0.0381575	-0.706071	0.00269567	0.0308739	-0.888571	0.000138963	0.00150208
ENSG00000171940.9	ZNF217	coding_mRNA	-0.663214	5.17e-05	0.00187883	-0.573214	0.000461351	0.0076303	-0.993214	9.31e-08	2.56e-06
ENSG00000100129.13	EIF3L	coding_mRNA	-0.662857	0.00236525	0.0368987	-0.757857	0.0012011	0.016359	-0.865357	0.000147281	0.00157662
ENSG00000105193.4	RPS16	coding_mRNA	-0.6625	0.000128076	0.00385643	-0.87	1.16e-05	0.000374166	-1	5.7e-07	1.26e-05
ENSG00000225733.1	FGD5-AS1	lncRNA_divergent	-0.661071	0.000186114	0.00525481	-0.886071	6.08e-06	0.000218249	-1.15857	2.79e-08	8.93e-07
ENSG00000256087.2	ZNF432	coding_mRNA	-0.660714	0.00238992	0.0371487	-0.888214	0.000206843	0.00397665	-0.805714	0.000371568	0.00351089
ENSG00000164323.8	KIAA1430	coding_mRNA	-0.66	7.1e-05	0.00241687	-0.4925	0.00197845	0.0242856	-0.9225	1.64e-06	3.22e-05
ENSG00000207975.1	MIR181B1	small_RNA	-0.66	0.00332846	0.0470659	-0.8775	0.000334565	0.00588452	-0.9675	9.39e-05	0.00106753
ENSG00000185650.8	ZFP36L1	coding_mRNA	-0.659286	0.000225106	0.00608207	-0.801786	6.52e-05	0.0015504	-1.18429	5.28e-08	1.56e-06
ENSG00000168487.13	BMP1	coding_mRNA	-0.659286	0.000369047	0.00893186	-1.28179	1.07e-07	7.32e-06	-0.781786	7.59e-05	0.000888793
ENSG00000114391.8	RPL24	coding_mRNA	-0.658571	0.000493103	0.0112103	-0.788571	0.000274415	0.0050121	-0.928571	1.01e-05	0.000155731
ENSG00000188460.4	ACTBP11	pseudogene	-0.658214	0.00229664	0.0360653	-0.713214	0.000867188	0.0128076	-0.545714	0.0094354	0.0516493
ENSG00000165527.5	ARF6	coding_mRNA	-0.656429	0.00089238	0.0177051	-0.651429	0.00131352	0.0175877	-0.926429	2.33e-05	0.000321829
ENSG00000184428.8	TOP1MT	coding_mRNA	-0.655714	0.000190863	0.00535899	-0.540714	0.00227953	0.027126	-0.593214	0.000911377	0.00760861
ENSG00000156482.6	RPL30	coding_mRNA	-0.655	1.08e-05	0.00053135	-0.68	8.08e-06	0.000277747	-0.61	1.43e-05	0.000209677
ENSG00000131013.3	PPIL4	coding_mRNA	-0.655	0.0024751	0.0379362	-0.81	0.000508674	0.00820888	-0.6475	0.00474801	0.029977
ENSG00000009413.11	REV3L	coding_mRNA	-0.654643	0.000105599	0.00332911	-1.49464	3.87e-10	8.04e-08	-0.974643	5e-07	1.13e-05
ENSG00000175220.7	ARHGAP1	coding_mRNA	-0.654286	0.0009157	0.0180428	-0.751786	0.000486533	0.00794018	-1.10429	7.37e-07	1.58e-05
ENSG00000230043.1	TMSB4XP6	pseudogene	-0.654286	0.00295328	0.0430149	-0.994286	6.41e-05	0.0015375	-1.34679	4.68e-07	1.06e-05
ENSG00000187735.8	TCEA1	coding_mRNA	-0.652143	0.00060869	0.0131206	-1.01964	4.27e-06	0.000161842	-1.58964	7.53e-10	3.89e-08
ENSG00000240065.3	PSMB9	coding_mRNA	-0.651786	0.00249478	0.0380704	-0.764286	0.00201705	0.0246281	-1.05679	1.49e-05	0.000217951
ENSG00000092531.5	SNAP23	coding_mRNA	-0.651786	0.00306358	0.0441102	-1.11679	1.95e-06	8.42e-05	-1.05179	1.79e-06	3.48e-05
ENSG00000181458.6	TMEM45A	coding_mRNA	-0.651786	0.000303232	0.00769779	-1.61429	1.55e-09	2.27e-07	-1.68679	2.04e-10	1.27e-08
ENSG00000090376.4	IRAK3	coding_mRNA	-0.651071	0.000126883	0.00383299	-0.811071	1.7e-05	0.000514793	-0.506071	0.00247688	0.0175727
ENSG00000168944.11	CEP120	coding_mRNA	-0.651071	0.00127485	0.0231702	-0.991071	3.17e-05	0.000864174	-0.571071	0.00171474	0.0129914
ENSG00000226400.2	CTD-2269E23.2	pseudogene	-0.650714	0.00117258	0.0217044	-0.685714	0.00455722	0.0458479	-0.925714	0.000394801	0.00368216
ENSG00000111261.9	MANSC1	coding_mRNA	-0.650714	0.00376831	0.0519196	-1.28321	1.11e-06	5.26e-05	-0.623214	0.00239265	0.0170918
ENSG00000187653.10	TMSB4XP8	pseudogene	-0.650357	0.00300625	0.0435677	-0.870357	0.000338639	0.0059436	-1.36536	4.26e-07	9.77e-06
ENSG00000183160.8	TMEM119	coding_mRNA	-0.649643	0.00187915	0.0309255	-1.23214	6.29e-06	0.000224854	-1.11964	5.49e-06	9.17e-05
ENSG00000101596.10	SMCHD1	coding_mRNA	-0.648929	0.000245292	0.00653195	-0.663929	0.000550665	0.00876047	-0.506429	0.00293185	0.0202478
ENSG00000124614.9	RPS10	coding_mRNA	-0.648929	3.03e-05	0.00122106	-0.673929	1.97e-05	0.000583852	-0.771429	1.09e-06	2.24e-05
ENSG00000103275.14	UBE2I	coding_mRNA	-0.647857	0.000261404	0.0068435	-0.747857	5.8e-05	0.00141016	-0.507857	0.00105402	0.00857765
ENSG00000197122.7	SRC	coding_mRNA	-0.646429	0.00143704	0.0251956	-0.663929	0.000951294	0.0137897	-1.17393	4.18e-07	9.63e-06
ENSG00000111670.10	GNPTAB	coding_mRNA	-0.645714	0.000901301	0.0178224	-0.630714	0.00391109	0.041131	-2.15071	7.29e-12	7.3e-10
ENSG00000185834.9	RPL12P4	pseudogene	-0.645	2.97e-05	0.00119901	-0.795	1.11e-05	0.00036231	-1.2325	9.23e-10	4.64e-08
ENSG00000163682.11	RPL9	coding_mRNA	-0.644643	9.06e-05	0.0029545	-0.622143	0.000345453	0.00603772	-0.614643	0.000144408	0.00155186
ENSG00000167004.8	PDIA3	coding_mRNA	-0.643929	0.00153061	0.0263228	-1.24143	2.01e-06	8.65e-05	-1.24893	4.47e-07	1.02e-05
ENSG00000021574.7	SPAST	coding_mRNA	-0.643571	0.000255446	0.00673276	-0.551071	0.00352421	0.0378602	-0.578571	0.000768742	0.00659584
ENSG00000111752.6	PHC1	coding_mRNA	-0.643214	0.00123554	0.0226414	-0.658214	0.001325	0.0177056	-0.723214	0.000312662	0.00302037
ENSG00000164597.9	COG5	coding_mRNA	-0.641429	0.00120488	0.0221917	-0.598929	0.00388779	0.0409403	-0.696429	0.000441748	0.00406096
ENSG00000233780.3	HNRNPA1P30	pseudogene	-0.641071	0.000898839	0.0177949	-0.651071	0.00179817	0.0225262	-0.746071	0.0001458	0.0015653
ENSG00000182899.10	RPL35A	coding_mRNA	-0.640714	3.19e-05	0.00126763	-0.628214	7.24e-05	0.00169067	-0.698214	6.25e-06	0.000102522
ENSG00000258021.1	RP11-1100L3.4	pseudogene	-0.640357	0.00330347	0.0467944	-0.725357	0.00160036	0.0206871	-0.880357	0.000185808	0.00193064
ENSG00000108107.8	RPL28	coding_mRNA	-0.64	0.000445501	0.0103649	-0.8025	5.17e-05	0.00128181	-0.795	2.11e-05	0.000294522
ENSG00000132646.6	PCNA	coding_mRNA	-0.64	0.0011903	0.0219819	-0.645	0.00255061	0.0295895	-1.7125	5.99e-10	3.16e-08
ENSG00000166794.4	PPIB	coding_mRNA	-0.6375	0.00151839	0.0261802	-1.0725	7.81e-06	0.000270073	-0.745	0.000268789	0.00265674
ENSG00000100316.11	RPL3	coding_mRNA	-0.636429	0.000212089	0.00579152	-0.858929	2.02e-05	0.000595041	-0.933929	8.14e-07	1.74e-05
ENSG00000178104.15	PDE4DIP	coding_mRNA	-0.636071	0.00217861	0.0347033	-1.22607	2.89e-06	0.000118192	-1.45357	7.53e-08	2.14e-06
ENSG00000113522.9	RAD50	coding_mRNA	-0.635714	0.000105172	0.00331881	-0.585714	0.000364044	0.00629809	-0.668214	5.26e-05	0.00065045
ENSG00000150961.10	SEC24D	coding_mRNA	-0.635357	0.00022853	0.00614959	-1.40786	4.98e-09	5.79e-07	-1.60286	2.29e-10	1.39e-08
ENSG00000038002.4	AGA	coding_mRNA	-0.635	0.000268564	0.00697303	-0.96	2.2e-05	0.000643161	-0.54	0.0032989	0.0223465
ENSG00000076043.5	REXO2	coding_mRNA	-0.634643	0.000230401	0.00619349	-1.33714	2.85e-08	2.49e-06	-1.52964	9.07e-10	4.57e-08
ENSG00000137154.8	RPS6	coding_mRNA	-0.634286	0.000140176	0.00416646	-0.731786	0.000115545	0.00247777	-0.819286	3.61e-06	6.4e-05
ENSG00000123416.11	TUBA1B	coding_mRNA	-0.633214	0.00116836	0.0216608	-0.978214	1.64e-05	0.000499721	-0.538214	0.00330265	0.0223674
ENSG00000134986.9	NREP	coding_mRNA	-0.632857	0.00132857	0.0238083	-1.59286	7.91e-09	8.51e-07	-2.51786	3.3e-13	5.45e-11
ENSG00000136044.7	APPL2	coding_mRNA	-0.6325	0.00280252	0.0414261	-0.7375	0.00248807	0.0289853	-1.1925	1.59e-06	3.14e-05
ENSG00000118495.14	PLAGL1	coding_mRNA	-0.631429	0.00109659	0.0206177	-0.863929	3.34e-05	0.000902218	-0.513929	0.00431713	0.0277357
ENSG00000124766.4	SOX4	coding_mRNA	-0.631429	0.000724449	0.0150219	-0.973929	7.09e-06	0.00024859	-0.806429	4.34e-05	0.000550266
ENSG00000257086.1	RP11-783K16.13	lncRNA_intergenic	-0.63	1.53e-05	0.000693925	-0.745	4.02e-06	0.000154627	-0.5025	0.000280442	0.00275503
ENSG00000100823.7	APEX1	coding_mRNA	-0.628571	0.000788832	0.0160468	-0.613571	0.00213919	0.0257872	-0.716071	0.000274124	0.00270144
ENSG00000164930.7	FZD6	coding_mRNA	-0.628571	0.000690344	0.014459	-1.21357	4.26e-07	2.36e-05	-1.40357	3.31e-09	1.42e-07
ENSG00000213741.4	RPS29	coding_mRNA	-0.6275	0.0010091	0.0194106	-0.955	1.08e-05	0.000353405	-1.045	1.81e-06	3.51e-05
ENSG00000148843.9	PDCD11	coding_mRNA	-0.627143	0.00117118	0.0217011	-0.779643	0.000178345	0.00352242	-0.499643	0.00532228	0.0327813
ENSG00000065923.5	SLC9A7	coding_mRNA	-0.626786	0.00229406	0.0360588	-0.801786	0.00104947	0.014777	-1.26929	5.73e-07	1.26e-05
ENSG00000107130.6	NCS1	coding_mRNA	-0.626429	0.00237015	0.0369233	-0.713929	0.00184827	0.0229721	-0.986429	6.81e-06	0.00011063
ENSG00000176788.7	BASP1	coding_mRNA	-0.625	0.00272164	0.04052	-0.8675	0.000121663	0.00258362	-1.645	4.18e-09	1.74e-07
ENSG00000174989.8	FBXW8	coding_mRNA	-0.624286	0.00113288	0.0211327	-0.766786	0.000236371	0.00444666	-0.889286	2.08e-05	0.000291332
ENSG00000145425.5	RPS3A	coding_mRNA	-0.623929	1.37e-05	0.000637755	-0.653929	5.61e-05	0.00137141	-0.828929	2.47e-07	6.04e-06
ENSG00000227081.4	RP11-543P15.1	pseudogene	-0.623929	3.08e-05	0.00123255	-0.738929	4.35e-06	0.000164053	-0.876429	2.34e-07	5.79e-06
ENSG00000188993.3	LRRC66	coding_mRNA	-0.623929	0.000484292	0.0110401	-1.03393	6.19e-06	0.000221408	-0.726429	7.81e-05	0.000910122
ENSG00000181744.4	C3orf58	coding_mRNA	-0.623214	0.000247796	0.0065881	-1.00321	5.08e-06	0.000188016	-1.12821	5.09e-08	1.52e-06
ENSG00000173473.6	SMARCC1	coding_mRNA	-0.6225	0.000205088	0.00565066	-0.8475	3.74e-05	0.000983109	-0.8225	6.38e-06	0.000104374
ENSG00000188612.7	SUMO2	coding_mRNA	-0.621786	5.44e-05	0.00195159	-0.726786	6.44e-05	0.00153992	-1.16929	4.21e-09	1.75e-07
ENSG00000212664.4	RP11-592N21.1	pseudogene	-0.621071	0.000147834	0.0043513	-0.591071	0.000947155	0.0137565	-0.796071	7.04e-06	0.000114034
ENSG00000090863.7	GLG1	coding_mRNA	-0.620357	9.9e-05	0.00317717	-1.19286	1.03e-08	1.05e-06	-1.45286	4.37e-11	3.49e-09
ENSG00000105438.4	KDELR1	coding_mRNA	-0.619643	0.000221977	0.00601218	-0.864643	1.16e-05	0.000373821	-0.634643	0.000179026	0.00186737
ENSG00000136754.12	ABI1	coding_mRNA	-0.619643	0.000624191	0.0133893	-0.667143	0.000333863	0.00587839	-0.944643	3.07e-06	5.58e-05
ENSG00000083845.4	RPS5	coding_mRNA	-0.618571	0.00351748	0.049053	-0.658571	0.00292944	0.03281	-0.741071	0.000618412	0.00549607
ENSG00000167470.8	MIDN	coding_mRNA	-0.618571	0.00172191	0.0288082	-0.976071	5.13e-05	0.00127582	-1.56357	5.52e-09	2.21e-07
ENSG00000149131.11	SERPING1	coding_mRNA	-0.6175	0.00067016	0.0141341	-1.295	3.94e-08	3.29e-06	-2.2725	3.69e-13	5.99e-11
ENSG00000102302.7	FGD1	coding_mRNA	-0.617143	0.00306037	0.0441102	-0.697143	0.00190607	0.0235497	-0.712143	0.000768853	0.00659584
ENSG00000115419.8	GLS	coding_mRNA	-0.616429	0.000661045	0.0139951	-0.918929	8.35e-06	0.000285048	-1.20393	7.42e-08	2.12e-06
ENSG00000145349.12	CAMK2D	coding_mRNA	-0.613929	3.59e-05	0.0014059	-0.616429	8.9e-05	0.00199602	-0.926429	8.54e-08	2.39e-06
ENSG00000255302.3	EID1	coding_mRNA	-0.613929	0.000403928	0.00958248	-0.618929	0.00434521	0.044291	-1.06393	2.14e-07	5.35e-06
ENSG00000166012.10	TAF1D	coding_mRNA	-0.613214	0.00164354	0.0277286	-0.928214	1.36e-05	0.000425623	-0.998214	5.11e-06	8.63e-05
ENSG00000196616.8	ADH1B	coding_mRNA	-0.612857	0.000769247	0.0157447	-0.640357	0.0008753	0.012893	-1.04036	9.99e-07	2.07e-05
ENSG00000220842.5	RP11-572P18.1	pseudogene	-0.6125	7.57e-05	0.00254786	-0.5925	0.000542835	0.00865103	-0.97	4.81e-08	1.44e-06
ENSG00000112655.11	PTK7	coding_mRNA	-0.612143	0.00224336	0.0354656	-1.08464	7.25e-06	0.000253408	-1.50714	8.87e-09	3.32e-07
ENSG00000235238.1	SUMO2P1	pseudogene	-0.611071	9.62e-05	0.00309703	-0.691071	0.000137784	0.00286418	-1.28357	6.28e-10	3.3e-08
ENSG00000139624.8	CERS5	coding_mRNA	-0.610357	0.00344305	0.0482985	-0.690357	0.00133117	0.0177739	-0.827857	0.000189414	0.00195953
ENSG00000129128.8	SPCS3	coding_mRNA	-0.61	0.000136801	0.00408438	-0.7225	4.91e-05	0.00122804	-0.5875	0.000195284	0.00201213
ENSG00000152022.7	LIX1L	coding_mRNA	-0.61	0.00154003	0.0264437	-0.7125	0.00114112	0.0157385	-0.84	7.27e-05	0.000858677
ENSG00000205542.6	TMSB4X	coding_mRNA	-0.609643	0.00114863	0.0213665	-0.987143	1.07e-05	0.000351846	-1.15964	2.63e-07	6.38e-06
ENSG00000138674.12	SEC31A	coding_mRNA	-0.609286	0.000129552	0.00388538	-0.711786	5.59e-05	0.00136734	-0.921786	2.7e-07	6.5e-06
ENSG00000106799.8	TGFBR1	coding_mRNA	-0.608929	0.00179208	0.0297427	-0.761429	0.000368995	0.00636555	-1.07143	1.32e-06	2.65e-05
ENSG00000152556.11	PFKM	coding_mRNA	-0.606786	0.00308061	0.0442618	-0.566786	0.00449498	0.0454417	-0.646786	0.00169183	0.0128383
ENSG00000270011.2	ZNF177	coding_mRNA	-0.606429	0.00398943	0.0540924	-0.686429	0.00137864	0.0183194	-0.576429	0.00447573	0.0286011
ENSG00000244313.2	RP11-425L10.1	pseudogene	-0.606429	0.000123512	0.00375505	-0.628929	0.000136477	0.0028388	-0.976429	6.69e-08	1.93e-06
ENSG00000116667.8	C1orf21	coding_mRNA	-0.605714	0.00112	0.0209511	-1.98321	3.15e-11	1.19e-08	-1.80821	8.55e-11	6.21e-09
ENSG00000074935.9	TUBE1	coding_mRNA	-0.605357	0.00244806	0.0376876	-0.760357	0.000283146	0.00514613	-1.42286	1.95e-08	6.52e-07
ENSG00000023318.7	ERP44	coding_mRNA	-0.603571	0.000203235	0.00560961	-0.566071	0.00104301	0.0147151	-0.663571	7.16e-05	0.000847408
ENSG00000234742.1	AC144530.1	pseudogene	-0.603571	0.00349747	0.048897	-0.636071	0.00286548	0.0322743	-0.816071	0.000399216	0.00371722
ENSG00000141101.8	NOB1	coding_mRNA	-0.603214	0.0032339	0.046089	-0.658214	0.00288708	0.0324804	-0.938214	1.45e-05	0.000212318
ENSG00000104907.8	TRMT1	coding_mRNA	-0.602857	0.00172795	0.0288802	-0.597857	0.00438469	0.0445841	-0.605357	0.00167099	0.0127062
ENSG00000140262.13	TCF12	coding_mRNA	-0.6025	0.000175824	0.00501535	-0.7675	2.78e-05	0.000778988	-1.0125	9.33e-08	2.57e-06
ENSG00000104897.5	SF3A2	coding_mRNA	-0.599286	0.00246447	0.0378257	-0.884286	5.95e-05	0.00144015	-0.531786	0.00453373	0.0288682
ENSG00000112249.9	ASCC3	coding_mRNA	-0.599286	0.00314695	0.0450315	-1.10179	2.46e-05	0.000706287	-1.20179	9.76e-07	2.03e-05
ENSG00000257529.1	RPL36A-HNRNPH2	coding_mRNA	-0.598929	0.00267925	0.0399963	-0.951429	3.16e-05	0.000863703	-0.981429	1.43e-05	0.000209677
ENSG00000106617.9	PRKAG2	coding_mRNA	-0.598929	0.00251521	0.0382775	-0.753929	0.000998892	0.0142957	-1.35393	6.26e-08	1.82e-06
ENSG00000237749.3	RP3-423B22.5	pseudogene	-0.598571	9.96e-05	0.00318801	-0.581071	0.000334531	0.00588452	-0.816071	1.6e-06	3.16e-05
ENSG00000135164.14	DMTF1	coding_mRNA	-0.598214	0.000607312	0.0130994	-0.570714	0.00178788	0.0224311	-0.630714	0.000182729	0.0019028
ENSG00000189343.6	RPS2P46	pseudogene	-0.597857	5.96e-06	0.000320863	-0.787857	3.63e-07	2.06e-05	-0.972857	7.71e-10	3.97e-08
ENSG00000084070.7	SMAP2	coding_mRNA	-0.5975	0.00119189	0.0219991	-0.51	0.00534212	0.0516659	-0.59	0.00157994	0.0121136
ENSG00000230409.2	TCEA1P2	pseudogene	-0.5975	7.77e-05	0.00260156	-0.9775	3.74e-07	2.11e-05	-1.555	1.29e-11	1.21e-09
ENSG00000136938.8	ANP32B	coding_mRNA	-0.597143	6.99e-05	0.00239305	-0.822143	2.46e-06	0.000102665	-1.18464	2.87e-09	1.25e-07
ENSG00000137076.14	TLN1	coding_mRNA	-0.596786	0.000343104	0.00844586	-1.04179	2.61e-07	1.58e-05	-0.716786	2.5e-05	0.000341168
ENSG00000039523.13	FAM65A	coding_mRNA	-0.596071	0.00105236	0.0199781	-0.886071	8.78e-06	0.000297971	-0.673571	9.65e-05	0.00109285
ENSG00000047849.17	MAP4	coding_mRNA	-0.595357	0.000487906	0.0111073	-0.635357	0.000534158	0.00856197	-0.592857	0.000405722	0.00376726
ENSG00000125952.14	MAX	coding_mRNA	-0.595	0.00201022	0.0325037	-0.8125	0.000276009	0.00503569	-0.88	3.09e-05	0.000410172
ENSG00000235508.2	RPS2P7	pseudogene	-0.593214	0.00145049	0.0253511	-0.975714	8.47e-06	0.000288803	-1.05321	1.65e-06	3.24e-05
ENSG00000120837.3	NFYB	coding_mRNA	-0.591786	0.00116534	0.0216406	-0.524286	0.00348981	0.0375391	-0.879286	3.63e-05	0.000471786
ENSG00000147403.12	RPL10	coding_mRNA	-0.590357	6.68e-05	0.00230672	-0.780357	3.23e-06	0.00013047	-0.755357	1.9e-06	3.66e-05
ENSG00000112306.7	RPS12	coding_mRNA	-0.589643	0.000113729	0.00352198	-0.832143	5.72e-06	0.000207977	-1.11714	7.17e-09	2.78e-07
ENSG00000216866.4	RPS2P55	pseudogene	-0.589643	0.000106271	0.00334396	-0.864643	1.55e-06	6.98e-05	-1.10964	3.32e-09	1.43e-07
ENSG00000109475.12	RPL34	coding_mRNA	-0.5875	0.000496982	0.0112753	-0.6775	0.000172259	0.00342663	-0.7325	3.8e-05	0.000491094
ENSG00000136628.13	EPRS	coding_mRNA	-0.586429	0.000262897	0.00686338	-0.608929	0.00036299	0.00628478	-0.963929	4.13e-07	9.56e-06
ENSG00000231409.3	RP11-83J16.1	pseudogene	-0.586429	0.00077345	0.015821	-1.13143	2e-07	1.25e-05	-1.26893	1.18e-08	4.27e-07
ENSG00000142937.7	RPS8	coding_mRNA	-0.584643	0.000228435	0.00614959	-0.927143	5.61e-07	2.96e-05	-1.04464	2.69e-08	8.66e-07
ENSG00000152518.5	ZFP36L2	coding_mRNA	-0.584286	0.000174996	0.00499602	-1.20679	1.86e-08	1.75e-06	-1.65679	5.89e-12	6.22e-10
ENSG00000125733.13	TRIP10	coding_mRNA	-0.584286	0.0021331	0.0341121	-1.25929	3.29e-07	1.91e-05	-1.98429	1.03e-11	9.89e-10
ENSG00000168140.4	VASN	coding_mRNA	-0.583214	0.00243458	0.037557	-1.08071	2.29e-05	0.000664301	-0.893214	4.09e-05	0.000522545
ENSG00000091136.9	LAMB1	coding_mRNA	-0.583214	0.000115588	0.00356628	-1.21571	1.76e-09	2.55e-07	-1.35821	5.68e-11	4.33e-09
ENSG00000182774.6	RPS17L	coding_mRNA	-0.582857	0.000117404	0.0036056	-0.615357	0.000183285	0.00359437	-0.720357	7.28e-06	0.000117434
ENSG00000101347.7	SAMHD1	coding_mRNA	-0.5825	0.00290715	0.0425768	-1.1725	2.4e-06	0.000100726	-1.465	5.79e-08	1.7e-06
ENSG00000166037.6	CEP57	coding_mRNA	-0.582143	0.00215619	0.0343792	-0.847143	0.000115717	0.00247986	-0.642143	0.000889595	0.00744965
ENSG00000196683.6	TOMM7	coding_mRNA	-0.582143	0.000670633	0.0141351	-0.869643	1.93e-05	0.000574556	-1.06964	5.31e-07	1.19e-05
ENSG00000213609.3	RP11-170M17.2	pseudogene	-0.580357	0.00255856	0.0387336	-0.620357	0.00114135	0.0157385	-1.08536	1.01e-06	2.09e-05
ENSG00000134597.9	RBMX2	coding_mRNA	-0.58	0.000954466	0.0186191	-0.7	0.000179605	0.00353895	-0.6975	0.000116757	0.00128972
ENSG00000117020.12	AKT3	coding_mRNA	-0.58	0.00223334	0.0353888	-0.9725	1.12e-05	0.000365638	-0.9575	3.77e-06	6.63e-05
ENSG00000100219.12	XBP1	coding_mRNA	-0.578571	0.000976578	0.0189417	-1.16107	1.38e-06	6.33e-05	-0.906071	2.38e-06	4.46e-05
ENSG00000136942.10	RPL35	coding_mRNA	-0.576429	0.000343319	0.00844586	-0.676429	0.000244195	0.00456289	-0.638929	8.36e-05	0.0009644
ENSG00000146374.9	RSPO3	coding_mRNA	-0.576429	0.000638523	0.0136399	-1.82143	3.36e-11	1.21e-08	-0.711429	0.000157644	0.00166823
ENSG00000187147.13	RNF220	coding_mRNA	-0.575714	0.00340352	0.0478652	-0.853214	0.00012206	0.00258911	-1.28571	1.18e-07	3.17e-06
ENSG00000107290.9	SETX	coding_mRNA	-0.575357	0.000234072	0.00627843	-0.600357	0.000255342	0.0047234	-0.455357	0.00171365	0.0129861
ENSG00000137492.3	PRKRIR	coding_mRNA	-0.575	0.00199982	0.0323985	-0.595	0.0016517	0.0211372	-0.7975	3.63e-05	0.000471786
ENSG00000092199.13	HNRNPC	coding_mRNA	-0.575	0.000852184	0.0170232	-0.8125	3.42e-05	0.000919879	-0.71	7.24e-05	0.000855784
ENSG00000134419.11	RPS15A	coding_mRNA	-0.574643	0.000502354	0.0113662	-0.704643	0.000137994	0.00286676	-0.859643	3.65e-06	6.43e-05
ENSG00000147604.9	RPL7	coding_mRNA	-0.574286	2.24e-05	0.000947341	-0.516786	0.000984245	0.0141347	-0.761786	1.7e-07	4.41e-06
ENSG00000244021.3	RP11-50D9.1	pseudogene	-0.574286	0.0013204	0.0236874	-0.634286	0.000983495	0.01413	-0.896786	2.67e-06	4.93e-05
ENSG00000118096.3	IFT46	coding_mRNA	-0.573571	0.00243425	0.037557	-0.653571	0.00396672	0.0414493	-1.00107	1.34e-05	0.000198849
ENSG00000063046.13	EIF4B	coding_mRNA	-0.5725	0.000197895	0.00550795	-0.57	0.00121622	0.0165175	-0.7375	8.68e-06	0.000136554
ENSG00000196935.4	SRGAP1	coding_mRNA	-0.571786	0.00199888	0.0323985	-1.11679	1.17e-06	5.46e-05	-1.49179	4.38e-09	1.81e-07
ENSG00000117616.13	C1orf63	coding_mRNA	-0.571429	0.00200595	0.032456	-0.646429	0.000805548	0.0120923	-0.928929	8.54e-06	0.000134644
ENSG00000219928.2	RP11-40C6.2	pseudogene	-0.571429	0.0032222	0.0459959	-0.773929	0.000223658	0.00425078	-0.941429	1.35e-05	0.000200642
ENSG00000133110.10	POSTN	coding_mRNA	-0.570714	0.0013589	0.02418	-1.59821	4.62e-09	5.46e-07	-2.54071	5.71e-14	1.41e-11
ENSG00000220793.4	RPL21P119	pseudogene	-0.568929	0.000417306	0.00984368	-0.583929	0.000996688	0.0142764	-0.863929	9.29e-07	1.95e-05
ENSG00000106554.7	CHCHD3	coding_mRNA	-0.568571	4.37e-05	0.00164526	-0.523571	0.000181717	0.0035702	-0.631071	4.33e-06	7.49e-05
ENSG00000147854.12	UHRF2	coding_mRNA	-0.568214	0.00262695	0.0394573	-0.603214	0.00153211	0.0199992	-1.15571	3.38e-07	7.95e-06
ENSG00000177707.6	PVRL3	coding_mRNA	-0.566071	0.00285116	0.0419414	-0.906071	6.97e-05	0.00164295	-1.13857	1.99e-07	5.06e-06
ENSG00000196230.8	TUBB	coding_mRNA	-0.565357	3.99e-05	0.00153353	-0.937857	1.05e-07	7.23e-06	-0.357857	0.00367719	0.0243939
ENSG00000189266.7	PNRC2	coding_mRNA	-0.565357	0.00065587	0.0139287	-1.00786	1.44e-06	6.53e-05	-1.50286	4.28e-10	2.41e-08
ENSG00000090861.11	AARS	coding_mRNA	-0.565	0.00205398	0.0330826	-0.775	0.0001734	0.00344109	-1.0275	1.71e-06	3.36e-05
ENSG00000228532.2	RP1-241P17.4	coding_mRNA	-0.565	0.00019679	0.00548636	-0.775	3.19e-05	0.000869019	-1.2875	5.89e-10	3.12e-08
ENSG00000162601.5	MYSM1	coding_mRNA	-0.563929	0.000691889	0.0144822	-0.511429	0.00262029	0.0301896	-0.488929	0.00275669	0.0192016
ENSG00000147274.10	RBMX	coding_mRNA	-0.562857	0.00221743	0.0351868	-0.747857	0.000291455	0.00527123	-0.815357	0.000136654	0.00147905
ENSG00000105404.6	RABAC1	coding_mRNA	-0.561786	0.000650473	0.0138418	-0.636786	0.000365224	0.00631359	-0.599286	0.000278616	0.00274246
ENSG00000115677.12	HDLBP	coding_mRNA	-0.561071	0.00110153	0.0206638	-0.543571	0.00345829	0.037345	-0.718571	8.14e-05	0.000942577
ENSG00000198034.6	RPS4X	coding_mRNA	-0.561071	1.27e-05	0.000600439	-0.796071	2.68e-07	1.62e-05	-1.11107	7.78e-11	5.71e-09
ENSG00000161970.8	RPL26	coding_mRNA	-0.560357	8.15e-05	0.00269527	-0.615357	9.39e-05	0.00208626	-0.917857	9.15e-08	2.53e-06
ENSG00000124786.8	SLC35B3	coding_mRNA	-0.56	0.00248922	0.038065	-0.8075	8.74e-05	0.00196959	-1.2975	5.69e-08	1.67e-06
ENSG00000137876.5	RSL24D1	coding_mRNA	-0.558929	0.00149118	0.0258699	-0.668929	0.000552716	0.00877906	-0.973929	1.18e-06	2.41e-05
ENSG00000111058.3	ACSS3	coding_mRNA	-0.558214	0.00241987	0.0374174	-0.603214	0.00471794	0.0469535	-0.550714	0.00248362	0.0176168
ENSG00000134186.7	PRPF38B	coding_mRNA	-0.5575	0.0034364	0.0482256	-0.76	0.000236576	0.00444801	-0.9625	2.48e-05	0.000339085
ENSG00000245910.4	SNHG6	lncRNA_intergenic	-0.557143	0.00130976	0.0235602	-0.952143	5.71e-05	0.0013925	-1.28714	1.55e-07	4.05e-06
ENSG00000077097.9	TOP2B	coding_mRNA	-0.556786	0.000578178	0.01261	-0.821786	2.25e-05	0.000655741	-0.949286	9.47e-07	1.98e-05
ENSG00000175390.8	EIF3F	coding_mRNA	-0.555714	0.00101086	0.0194119	-0.783214	6.24e-05	0.00150229	-1.02071	3.51e-07	8.24e-06
ENSG00000150403.13	TMCO3	coding_mRNA	-0.555357	0.00230999	0.0362406	-0.752857	0.000185579	0.00363079	-1.32786	2.05e-08	6.81e-07
CATG00000089634.1	CATG00000089634.1	coding_mRNA	-0.553571	0.00019934	0.00553424	-0.698571	1.6e-05	0.000491078	-0.908571	2.49e-07	6.1e-06
ENSG00000232818.2	RPS2P32	pseudogene	-0.553571	0.00377856	0.0519959	-1.47607	2.29e-08	2.08e-06	-2.46107	4.63e-13	7.23e-11
ENSG00000145741.11	BTF3	coding_mRNA	-0.552857	0.000315024	0.00791366	-0.565357	0.00203051	0.024738	-0.737857	5.45e-06	9.12e-05
ENSG00000198053.7	SIRPA	coding_mRNA	-0.5525	0.00295698	0.0430412	-0.65	0.000588699	0.00930172	-1.2425	5.25e-08	1.56e-06
ENSG00000196591.7	HDAC2	coding_mRNA	-0.551071	0.00021118	0.00577144	-0.473571	0.00403689	0.0419847	-0.683571	2.38e-05	0.000328112
ENSG00000167526.9	RPL13	coding_mRNA	-0.547857	0.000317199	0.00794431	-0.832857	6.62e-05	0.00157266	-1.21536	2.2e-09	9.91e-08
ENSG00000228981.3	RP11-364L4.1	pseudogene	-0.5475	0.00240886	0.0373425	-1	1.74e-06	7.67e-05	-1.1825	4.54e-08	1.38e-06
ENSG00000137693.9	YAP1	coding_mRNA	-0.545714	0.000504967	0.0114175	-0.625714	0.000496561	0.00807927	-0.450714	0.00260139	0.0182768
ENSG00000240376.1	RP11-36C20.1	pseudogene	-0.545357	0.00146329	0.025531	-0.807857	6.51e-06	0.000230738	-1.14036	3.69e-09	1.56e-07
ENSG00000215158.5	RP11-1023L17.1	pseudogene	-0.544643	0.00213861	0.0341644	-0.552143	0.00262442	0.030214	-0.982143	1.32e-06	2.65e-05
ENSG00000167972.9	ABCA3	coding_mRNA	-0.544286	0.00399153	0.0540987	-0.679286	0.000856316	0.0126921	-1.01929	4.87e-06	8.3e-05
ENSG00000102316.12	MAGED2	coding_mRNA	-0.543929	0.00203103	0.0327565	-1.04143	1.61e-06	7.21e-05	-0.881429	4.27e-06	7.38e-05
ENSG00000144713.8	RPL32	coding_mRNA	-0.543214	0.00263228	0.0394573	-0.593214	0.00162979	0.0209373	-0.870714	8.64e-06	0.000135966
ENSG00000220157.4	HNRNPA1P12	pseudogene	-0.542857	0.00306562	0.0441206	-0.592857	0.00323774	0.0355287	-0.515357	0.00499931	0.0312492
ENSG00000171456.12	ASXL1	coding_mRNA	-0.541786	0.0029348	0.0428872	-0.711786	0.000294067	0.00531274	-1.34429	1.35e-08	4.78e-07
ENSG00000198728.6	LDB1	coding_mRNA	-0.54	0.00157807	0.0269577	-0.795	4.05e-05	0.00104815	-0.8425	9.04e-06	0.000141381
ENSG00000227939.1	RPL3P2	pseudogene	-0.538571	0.00255379	0.0386966	-0.611071	0.00119767	0.0163189	-0.878571	2.92e-05	0.000391274
ENSG00000135905.14	DOCK10	coding_mRNA	-0.538214	0.00375127	0.0517615	-0.988214	4.22e-05	0.00108629	-1.42571	1.63e-08	5.59e-07
ENSG00000104472.5	CHRAC1	coding_mRNA	-0.533929	0.00246336	0.0378257	-0.541429	0.00492548	0.0486142	-0.953929	9.82e-06	0.000151508
ENSG00000231500.2	RPS18	coding_mRNA	-0.533571	0.000107779	0.00338183	-0.611071	2.94e-05	0.00081794	-0.788571	2.67e-07	6.46e-06
ENSG00000213676.6	ATF6B	coding_mRNA	-0.533571	0.00381209	0.0522415	-0.743571	0.000143446	0.00295924	-0.698571	0.000166053	0.00174942
ENSG00000187239.12	FNBP1	coding_mRNA	-0.533214	0.00268223	0.0400229	-0.728214	0.000248065	0.00461703	-0.588214	0.0016598	0.0126414
ENSG00000220472.1	RP11-69L16.5	pseudogene	-0.531786	0.00281694	0.0415667	-0.601786	0.00190012	0.0235112	-0.986786	1.55e-05	0.000225326
ENSG00000236360.1	RP11-334A14.2	pseudogene	-0.531429	0.000917522	0.018068	-0.996429	1.7e-06	7.53e-05	-1.17643	1.81e-08	6.12e-07
ENSG00000143514.12	TP53BP2	coding_mRNA	-0.53	0.00238798	0.0371487	-0.6725	0.000420269	0.00710437	-0.565	0.00142904	0.0111233
ENSG00000169439.7	SDC2	coding_mRNA	-0.53	4.92e-05	0.00180291	-0.7025	4.82e-06	0.000179718	-0.8125	1.26e-07	3.36e-06
ENSG00000184840.7	TMED9	coding_mRNA	-0.529643	0.00258378	0.0390088	-0.774643	0.000608426	0.00956796	-0.569643	0.000855193	0.00721922
CATG00000028782.1	CATG00000028782.1	lncRNA_divergent	-0.528214	0.00118432	0.0218836	-1.28321	1.01e-07	7.02e-06	-1.03571	6.57e-07	1.43e-05
ENSG00000073584.14	SMARCE1	coding_mRNA	-0.527143	0.00074225	0.0153147	-0.752143	4.86e-05	0.00121654	-0.459643	0.00231495	0.0166297
ENSG00000226259.6	GTF2H2B	pseudogene	-0.527143	0.00108338	0.0204039	-0.682143	0.00010262	0.00224844	-0.557143	0.00102526	0.00839502
ENSG00000168495.8	POLR3D	coding_mRNA	-0.526429	0.00336209	0.0474027	-0.858929	4.79e-05	0.00120089	-0.783929	6.93e-05	0.000824351
ENSG00000136827.11	TOR1A	coding_mRNA	-0.525	0.00348875	0.0488047	-0.825	0.000134985	0.00281303	-0.54	0.00245965	0.0174691
ENSG00000078246.11	TULP3	coding_mRNA	-0.525	0.000494804	0.0112412	-0.76	1.16e-05	0.000373821	-0.9525	2.26e-07	5.61e-06
ENSG00000124151.14	NCOA3	coding_mRNA	-0.524643	0.00158116	0.0269965	-0.884643	7.13e-06	0.000250022	-1.59964	3.56e-10	2.03e-08
ENSG00000174572.3	RP11-209A2.1	pseudogene	-0.522857	0.00232847	0.0364447	-0.935357	6.02e-06	0.000216777	-1.17786	7.33e-08	2.1e-06
ENSG00000118680.8	MYL12B	coding_mRNA	-0.520357	0.000154837	0.00452538	-0.622857	6.11e-05	0.00147426	-0.655357	8.75e-06	0.000137441
ENSG00000075624.9	ACTB	coding_mRNA	-0.515357	0.00254245	0.0385775	-0.770357	0.000250268	0.00464763	-0.867857	7.78e-06	0.000124202
ENSG00000186073.7	C15orf41	coding_mRNA	-0.514643	0.00341426	0.047996	-1.41964	8.02e-08	5.85e-06	-1.91714	9.82e-12	9.57e-10
ENSG00000162545.5	CAMK2N1	coding_mRNA	-0.512857	0.000297482	0.0075818	-1.42786	2.98e-10	6.73e-08	-1.99036	5.4e-14	1.34e-11
ENSG00000071564.10	TCF3	coding_mRNA	-0.512143	0.0034894	0.0488047	-0.572143	0.00271172	0.0309362	-0.889643	2.58e-05	0.000350994
ENSG00000242262.1	RP11-100N21.1	pseudogene	-0.511429	0.00216657	0.034528	-0.671429	0.000288395	0.00522441	-1.00893	8.69e-07	1.84e-05
ENSG00000164438.5	TLX3	coding_mRNA	-0.511071	0.00278836	0.0413099	-0.831071	2.78e-05	0.000779185	-1.08107	2.64e-07	6.4e-06
ENSG00000175203.11	DCTN2	coding_mRNA	-0.508929	0.0018548	0.0305853	-0.791429	7.3e-05	0.00170435	-0.431429	0.00498292	0.0311869
ENSG00000213399.2	AC022210.2	pseudogene	-0.507143	0.000663718	0.0140339	-0.722143	8.07e-05	0.00184557	-1.04464	4.57e-08	1.38e-06
ENSG00000115963.9	RND3	coding_mRNA	-0.503929	0.00169575	0.0284565	-0.521429	0.00433648	0.0442428	-0.746429	3.13e-05	0.000414607
ENSG00000234851.3	RP11-3P17.3	pseudogene	-0.503929	0.0015653	0.0267808	-0.516429	0.00236256	0.0278155	-0.891429	1.79e-06	3.48e-05
ENSG00000196531.6	NACA	coding_mRNA	-0.503214	0.000111214	0.00345733	-0.468214	0.000937711	0.0136372	-0.440714	0.000314358	0.00303587
ENSG00000177879.10	AP3S1	coding_mRNA	-0.4975	0.000952477	0.0186021	-0.65	9.9e-05	0.00218348	-1.05	1.88e-08	6.32e-07
ENSG00000177954.7	RPS27	coding_mRNA	-0.496429	0.000113273	0.00351115	-0.696429	3.43e-06	0.000135938	-0.793929	1.05e-07	2.85e-06
ENSG00000175215.5	CTDSP2	coding_mRNA	-0.493571	0.00248492	0.0380425	-0.766071	4.34e-05	0.00111213	-0.956071	5.66e-07	1.25e-05
ENSG00000182670.9	TTC3	coding_mRNA	-0.493214	0.000357612	0.00871369	-0.530714	0.000302092	0.00541641	-0.643214	1.37e-05	0.000201817
ENSG00000230903.5	RPL9P8	pseudogene	-0.491786	0.000421888	0.009921	-0.634286	0.000138818	0.00288027	-0.674286	3.55e-05	0.000463707
ENSG00000151292.13	CSNK1G3	coding_mRNA	-0.489643	0.0038456	0.0525275	-0.712143	0.00011958	0.00254544	-1.05964	1.32e-07	3.5e-06
ENSG00000240759.1	RP11-25I15.1	pseudogene	-0.486786	0.000244706	0.00652681	-0.604286	4.06e-05	0.00105178	-0.899286	4.93e-08	1.48e-06
ENSG00000135862.5	LAMC1	coding_mRNA	-0.486071	0.000363394	0.00881581	-1.02107	2.78e-08	2.44e-06	-0.923571	4.76e-08	1.43e-06
ENSG00000128595.12	CALU	coding_mRNA	-0.483929	0.000263698	0.00687891	-0.928929	4.13e-07	2.29e-05	-0.553929	5.6e-05	0.000684696
ENSG00000122026.6	RPL21	coding_mRNA	-0.483571	0.000540186	0.0120017	-0.586071	0.000393092	0.00672197	-0.816071	7.31e-07	1.57e-05
ENSG00000155508.9	CNOT8	coding_mRNA	-0.4825	0.00369812	0.0512071	-0.64	0.0002744	0.0050121	-1.0725	7.86e-08	2.22e-06
ENSG00000198242.9	RPL23A	coding_mRNA	-0.482143	0.00138461	0.0245218	-0.602143	0.00044495	0.00740322	-0.929643	3.92e-07	9.13e-06
ENSG00000183474.11	GTF2H2C	coding_mRNA	-0.479286	0.0019331	0.0316412	-0.496786	0.00319901	0.0352783	-0.486786	0.00168064	0.012765
ENSG00000142156.10	COL6A1	coding_mRNA	-0.478929	0.000137724	0.00410457	-0.696429	2.75e-06	0.000112854	-0.663929	1.47e-06	2.93e-05
ENSG00000236565.2	HNRNPA3P5	pseudogene	-0.478571	0.000406528	0.00963044	-0.661071	3.18e-05	0.000866507	-0.686071	5.93e-06	9.8e-05
ENSG00000229267.2	AC072062.1	lncRNA_divergent	-0.475357	0.000474942	0.0108997	-0.707857	1.4e-05	0.000435403	-0.755357	5.88e-06	9.72e-05
ENSG00000104774.8	MAN2B1	coding_mRNA	-0.472857	0.0023774	0.0370015	-0.750357	3.24e-05	0.000881108	-0.792857	8.09e-06	0.00012821
ENSG00000113712.12	CSNK1A1	coding_mRNA	-0.47	0.00038999	0.00933842	-0.475	0.000617901	0.00968979	-0.58	3.93e-05	0.00050458
ENSG00000170144.14	HNRNPA3	coding_mRNA	-0.466786	0.000556862	0.0122496	-0.636786	9.17e-05	0.00204313	-0.581786	8.92e-05	0.00101895
ENSG00000074695.5	LMAN1	coding_mRNA	-0.465	0.000324657	0.00808845	-0.9825	9.4e-08	6.65e-06	-0.39	0.00226449	0.0163591
ENSG00000244398.1	RP11-466H18.1	pseudogene	-0.465	0.00303134	0.0438168	-0.845	7.36e-06	0.000256602	-0.9225	1.03e-06	2.12e-05
ENSG00000008441.12	NFIX	coding_mRNA	-0.460714	0.000240725	0.00644646	-0.573214	7.72e-05	0.00178464	-0.460714	0.00056712	0.00508695
ENSG00000152795.13	HNRNPDL	coding_mRNA	-0.459643	0.00097059	0.0188672	-0.589643	0.000318275	0.00564878	-0.587143	7.84e-05	0.00091368
ENSG00000137818.7	RPLP1	coding_mRNA	-0.457857	0.00109645	0.0206177	-0.587857	0.000294069	0.00531274	-0.990357	2.29e-08	7.49e-07
ENSG00000118263.10	KLF7	coding_mRNA	-0.4525	0.00361735	0.050235	-0.95	1.06e-06	5.06e-05	-0.9675	3.9e-07	9.1e-06
ENSG00000116251.5	RPL22	coding_mRNA	-0.447857	0.00121747	0.0223596	-0.500357	0.0010198	0.0145012	-0.505357	0.000238193	0.00238552
ENSG00000134910.8	STT3A	coding_mRNA	-0.4475	0.000982427	0.0190195	-0.88	4.49e-07	2.46e-05	-0.6625	1.42e-05	0.000208183
ENSG00000213860.3	RPL21P75	pseudogene	-0.442857	0.00193735	0.0316796	-0.547857	0.000581486	0.00919649	-0.772857	2.89e-06	5.27e-05
ENSG00000183405.5	RPS7P1	pseudogene	-0.436786	0.0039004	0.0531669	-0.531786	0.00157624	0.0204469	-0.824286	3.62e-06	6.4e-05
ENSG00000231767.2	MIR4426	pseudogene	-0.433571	0.000587922	0.0127722	-0.558571	0.000119258	0.00254389	-0.641071	7.36e-06	0.000118298
ENSG00000068697.6	LAPTM4A	coding_mRNA	-0.429643	0.000162228	0.00470008	-0.594643	1.79e-05	0.000535918	-0.549643	7.05e-06	0.000114138
ENSG00000125691.8	RPL23	coding_mRNA	-0.426786	0.00295289	0.0430149	-0.436786	0.00447471	0.0453056	-0.664286	1.22e-05	0.00018404
ENSG00000069702.6	TGFBR3	coding_mRNA	-0.425357	0.00263402	0.0394629	-1.01786	6.47e-08	4.9e-06	-1.48036	1.27e-11	1.2e-09
ENSG00000171863.8	RPS7	coding_mRNA	-0.421786	0.000796443	0.016172	-0.536786	0.000191483	0.00373315	-0.589286	3.93e-05	0.000505108
ENSG00000136960.8	ENPP2	coding_mRNA	-0.421786	0.00177948	0.0295928	-1.38679	3.33e-10	7.29e-08	-1.30679	2.9e-10	1.71e-08
ENSG00000166333.9	ILK	coding_mRNA	-0.416786	0.00323588	0.0460923	-0.791786	3.95e-06	0.000153129	-0.679286	2.39e-05	0.000328869
ENSG00000015479.13	MATR3	coding_mRNA	-0.412857	0.000686682	0.0144186	-0.507857	0.000289523	0.005242	-0.365357	0.00163267	0.012469
ENSG00000226221.1	AC022431.1	pseudogene	-0.406071	0.0033462	0.0472187	-0.703571	5.01e-05	0.00124896	-0.671071	3.16e-05	0.000418233
ENSG00000091986.11	CCDC80	coding_mRNA	-0.400714	0.00065623	0.0139287	-1.03821	1.8e-09	2.59e-07	-0.893214	1.17e-08	4.22e-07
ENSG00000134352.15	IL6ST	coding_mRNA	-0.396429	0.00247807	0.0379644	-0.918929	2.1e-07	1.3e-05	-0.796429	6.37e-07	1.39e-05
ENSG00000138326.14	RPS24	coding_mRNA	-0.393571	0.00255745	0.0387336	-0.428571	0.00287643	0.0323757	-0.441071	0.000537536	0.0048438
ENSG00000170515.9	PA2G4	coding_mRNA	-0.393214	0.00165832	0.027941	-0.438214	0.00126377	0.0170312	-0.375714	0.00207417	0.015239
ENSG00000122406.8	RPL5	coding_mRNA	-0.362857	0.00249529	0.0380704	-0.472857	0.000379438	0.00652202	-0.612857	5.58e-06	9.28e-05
ENSG00000142534.2	RPS11	coding_mRNA	-0.353929	0.00284928	0.0419414	-0.576429	3.53e-05	0.000940479	-0.518929	3.83e-05	0.000494263
ENSG00000118816.5	CCNI	coding_mRNA	-0.3475	0.00229647	0.0360653	-0.6525	3.94e-06	0.00015281	-0.88	4.32e-09	1.79e-07

## Sheet: Supplementary Table 5
Supplementary Table 5. Genes independently downregulated by each ADIPINT targeting GapmeR
geneID	geneName	geneClass	logFC.GapmeR 1	P.Value.GapmeR 1	FDR.GapmeR 1	logFC.GapmeR 2	P.Value.GapmeR 2	FDR.GapmeR 2	logFC.GapmeR 3	P.Value.GapmeR 3	FDR.GapmeR 3
CATG00000106343.1	CATG00000106343.1	lncRNA_intergenic	5.00036	1.79e-14	4.29e-11	3.81036	3.43e-12	2.28e-09	5.65036	3.16e-16	2.23e-13
ENSG00000109424.3	UCP1	coding_mRNA	4.48143	1.37e-17	9.11e-14	4.78893	1.79e-18	1.49e-14	4.77393	1.53e-17	2.67e-14
ENSG00000091129.15	NRCAM	coding_mRNA	4.25929	2.82e-19	4.7e-15	1.60929	8.06e-11	2.42e-08	0.889286	1.43e-06	2.85e-05
ENSG00000153283.8	CD96	coding_mRNA	3.53964	4.47e-18	3.72e-14	1.31464	2.94e-09	3.82e-07	4.19964	3.53e-19	1.3e-15
ENSG00000173930.8	SLCO4C1	coding_mRNA	3.37036	1.93e-14	4.29e-11	3.68536	2.09e-15	6.32e-12	4.14536	6.19e-17	7.36e-14
ENSG00000162849.11	KIF26B	coding_mRNA	3.33143	1.16e-16	5.5e-13	4.96643	3.9e-18	2.59e-14	2.97393	2.1e-15	1.03e-12
ENSG00000120899.13	PTK2B	coding_mRNA	3.23714	2.15e-12	1.82e-09	2.57714	2.68e-10	6.24e-08	2.75714	7.88e-11	5.76e-09
ENSG00000142583.13	SLC2A5	coding_mRNA	3.18179	8.45e-14	1.41e-10	3.97429	4.46e-16	2.12e-12	4.70429	5.98e-17	7.36e-14
ENSG00000091513.10	TF	coding_mRNA	3.06179	4.31e-12	3.05e-09	6.69179	2.81e-19	3.12e-15	6.61429	1.72e-19	9.51e-16
ENSG00000157152.12	SYN2	lncRNA_intergenic	2.75536	9.52e-11	3.72e-08	4.37536	1.82e-14	2.98e-11	3.28036	1.09e-12	1.47e-10
ENSG00000151388.6	ADAMTS12	coding_mRNA	2.74357	3.36e-13	4.3e-10	0.581071	0.00420686	0.0432386	2.78607	1.17e-13	2.34e-11
ENSG00000124743.5	KLHL31	coding_mRNA	2.53679	3.18e-13	4.23e-10	2.44679	3.51e-12	2.29e-09	3.88179	1.52e-16	1.45e-13
ENSG00000019169.9	MARCO	coding_mRNA	2.52821	8.27e-12	5.09e-09	3.35071	7.78e-14	1.13e-10	3.54571	6.18e-14	1.48e-11
ENSG00000181856.10	SLC2A4	coding_mRNA	2.50464	1.36e-10	5.09e-08	3.04964	3.67e-12	2.35e-09	3.84464	6.02e-14	1.46e-11
ENSG00000167107.8	ACSF2	coding_mRNA	2.35821	1.89e-14	4.29e-11	1.71071	2.58e-11	1.01e-08	2.93821	1.43e-16	1.39e-13
ENSG00000161642.13	ZNF385A	coding_mRNA	2.33679	1.13e-11	6.14e-09	1.02179	1.75e-05	0.000526601	1.55179	1.16e-08	4.19e-07
ENSG00000159164.5	SV2A	coding_mRNA	2.33464	3.9e-14	7.21e-11	5.40964	2.12e-20	7.06e-16	6.34214	1.39e-21	3.5e-17
ENSG00000237272.1	OR51R1P	pseudogene	2.3325	5.59e-11	2.33e-08	3.8225	1.1e-13	1.41e-10	3.2575	1.16e-12	1.56e-10
CATG00000118013.1	CATG00000118013.1	lncRNA_intergenic	2.29786	2.06e-11	1.02e-08	2.69536	1.79e-12	1.45e-09	1.96036	2.96e-10	1.73e-08
ENSG00000123360.7	PDE1B	coding_mRNA	2.2875	1.88e-14	4.29e-11	1.6725	5.33e-11	1.74e-08	3.205	3.05e-17	4.41e-14
ENSG00000157150.4	TIMP4	coding_mRNA	2.27643	2.02e-12	1.8e-09	2.52893	2.46e-12	1.76e-09	0.936429	6.24e-06	0.000102456
ENSG00000197375.8	SLC22A5	coding_mRNA	2.25714	3.99e-11	1.75e-08	3.94714	8.3e-16	3.45e-12	3.02214	1.52e-13	2.89e-11
ENSG00000153246.7	PLA2R1	coding_mRNA	2.25464	2.53e-11	1.2e-08	3.91214	2.42e-15	6.7e-12	1.64464	1.19e-08	4.28e-07
ENSG00000089127.8	OAS1	coding_mRNA	2.22429	2.97e-09	6.13e-07	2.55429	1.87e-10	4.59e-08	1.94429	3.89e-08	1.2e-06
ENSG00000161249.16	DMKN	coding_mRNA	2.17321	8.94e-13	9.01e-10	2.97821	4.12e-15	9.79e-12	3.10071	1.62e-15	8.67e-13
ENSG00000170522.5	ELOVL6	coding_mRNA	2.15036	2.04e-15	6.78e-12	3.53536	2.81e-19	3.12e-15	4.25536	2.1e-21	3.5e-17
ENSG00000083720.8	OXCT1	coding_mRNA	2.14357	1.43e-13	2.16e-10	1.12857	6.82e-07	3.46e-05	1.60607	5.5e-11	4.21e-09
ENSG00000162769.8	FLVCR1	coding_mRNA	2.07643	2.34e-12	1.9e-09	3.09893	9.53e-16	3.52e-12	3.39393	6.34e-16	3.95e-13
ENSG00000137878.12	GCOM1	coding_mRNA	2.06071	1.79e-12	1.65e-09	1.98571	3.29e-11	1.21e-08	1.70571	1.39e-10	9.33e-09
ENSG00000152137.2	HSPB8	coding_mRNA	2.00893	1.53e-09	3.74e-07	2.67143	2.32e-11	9.53e-09	2.79643	2.62e-12	3.14e-10
ENSG00000135114.8	OASL	coding_mRNA	1.99786	3.68e-07	3.18e-05	2.18786	7.86e-08	5.76e-06	2.40036	2.09e-08	6.91e-07
ENSG00000197872.7	FAM49A	coding_mRNA	1.98714	7.09e-10	2.01e-07	2.00964	1.88e-08	1.77e-06	3.13464	1.16e-13	2.34e-11
CATG00000022796.1	CATG00000022796.1	coding_mRNA	1.98429	3.55e-08	4.67e-06	1.76679	5.33e-07	2.84e-05	2.38679	2.9e-08	9.24e-07
ENSG00000129682.9	FGF13	coding_mRNA	1.92607	2.11e-10	7.1e-08	0.988571	2.09e-05	0.000615299	1.08857	2.99e-06	5.44e-05
ENSG00000106772.13	PRUNE2	coding_mRNA	1.905	2.04e-10	6.91e-08	1.53	9.06e-09	9.54e-07	1.945	1.35e-10	9.13e-09
ENSG00000255503.1	RP11-113K21.4	lncRNA_intergenic	1.85357	2.95e-08	3.99e-06	2.08607	1.81e-09	2.59e-07	1.70857	3.58e-08	1.11e-06
ENSG00000126709.10	IFI6	coding_mRNA	1.835	5.04e-08	6.4e-06	1	0.000386996	0.00663479	1.405	4.95e-06	8.41e-05
ENSG00000157193.10	LRP8	coding_mRNA	1.805	1.16e-07	1.27e-05	0.9375	0.000382305	0.00656451	1.8475	5.52e-08	1.63e-06
ENSG00000131730.11	CKMT2	coding_mRNA	1.80107	1.62e-09	3.78e-07	2.94107	4.58e-11	1.55e-08	3.07607	3.25e-14	8.8e-12
ENSG00000135414.5	GDF11	coding_mRNA	1.80036	6.74e-10	1.95e-07	1.68036	6.49e-09	7.19e-07	1.80536	6.18e-10	3.25e-08
ENSG00000196850.4	PPTC7	coding_mRNA	1.79679	5.66e-10	1.71e-07	1.06429	5.54e-07	2.93e-05	1.26179	9.97e-09	3.68e-07
ENSG00000055957.6	ITIH1	coding_mRNA	1.73607	1.62e-08	2.52e-06	3.26357	3.75e-13	4.03e-10	2.87607	1.14e-12	1.53e-10
ENSG00000171954.8	CYP4F22	coding_mRNA	1.73286	9.75e-08	1.1e-05	1.58286	1.73e-07	1.12e-05	1.63286	3.27e-07	7.71e-06
ENSG00000188917.10	TRMT2B	coding_mRNA	1.7175	2.47e-08	3.51e-06	0.8275	0.000505359	0.00816826	0.6975	0.00199067	0.0147329
ENSG00000204257.10	HLA-DMA	coding_mRNA	1.67143	1.46e-09	3.6e-07	2.21643	2.71e-11	1.05e-08	2.29143	4.82e-12	5.29e-10
ENSG00000152256.9	PDK1	coding_mRNA	1.66964	5.82e-12	3.88e-09	2.41464	1.14e-14	2.11e-11	3.16214	1.61e-17	2.67e-14
ENSG00000139132.10	FGD4	coding_mRNA	1.64893	2.64e-08	3.69e-06	1.48143	1.65e-07	1.08e-05	2.06143	3.48e-10	2e-08
ENSG00000101049.10	SGK2	coding_mRNA	1.64893	4.12e-06	0.000235918	2.58893	2.48e-09	3.33e-07	2.91143	2.23e-10	1.37e-08
CATG00000079654.1	CATG00000079654.1	lncRNA_intergenic	1.63107	5.39e-10	1.66e-07	4.15607	8.43e-18	4.67e-14	1.10607	4.25e-07	9.76e-06
ENSG00000260912.1	RP11-363E7.4	lncRNA_intergenic	1.6275	5.49e-09	1.03e-06	1.81	2.11e-09	2.89e-07	1.6625	7.16e-09	2.77e-07
ENSG00000131480.4	AOC2	coding_mRNA	1.59679	2.1e-08	3.1e-06	1.99179	1.89e-10	4.6e-08	2.74679	4.57e-12	5.03e-10
ENSG00000169282.13	KCNAB1	coding_mRNA	1.59393	1.34e-07	1.41e-05	1.60393	2.42e-08	2.18e-06	1.58393	1.58e-08	5.46e-07
ENSG00000157600.7	TMEM164	coding_mRNA	1.5925	2.89e-08	3.93e-06	1.245	1.41e-06	6.43e-05	2.3575	2.12e-11	1.85e-09
ENSG00000123104.7	ITPR2	coding_mRNA	1.58786	1.24e-10	4.75e-08	0.902857	9.3e-07	4.51e-05	1.42036	5.91e-10	3.13e-08
ENSG00000129595.8	EPB41L4A	coding_mRNA	1.55036	3.11e-08	4.19e-06	1.54536	7.78e-07	3.86e-05	1.87286	1.1e-09	5.38e-08
CATG00000113654.1	CATG00000113654.1	uncertain_coding	1.53071	3.48e-07	3.07e-05	1.70321	1.04e-07	7.19e-06	2.19321	4.47e-10	2.49e-08
ENSG00000149256.10	TENM4	coding_mRNA	1.52393	2.48e-09	5.49e-07	1.99893	1.83e-11	8.12e-09	1.89393	1.64e-11	1.49e-09
ENSG00000263155.1	MYZAP	coding_mRNA	1.51857	2e-07	1.95e-05	1.41107	1.24e-06	5.76e-05	1.28607	1.71e-06	3.36e-05
ENSG00000026652.9	AGPAT4	coding_mRNA	1.47857	7.7e-07	5.86e-05	0.811071	0.000902358	0.0132155	0.916071	0.000240352	0.00240392
ENSG00000130208.5	APOC1	coding_mRNA	1.4775	9.24e-10	2.49e-07	2.175	8.27e-13	7.43e-10	1.1825	2.14e-08	7.06e-07
ENSG00000160326.9	SLC2A6	coding_mRNA	1.47071	2.22e-08	3.23e-06	1.73821	1.51e-09	2.26e-07	1.73821	6.93e-10	3.61e-08
ENSG00000147592.4	LACTB2	coding_mRNA	1.46964	2.14e-08	3.14e-06	2.67464	2.35e-13	2.79e-10	2.54714	2.24e-13	3.91e-11
ENSG00000173638.14	SLC19A1	coding_mRNA	1.44643	8.61e-09	1.5e-06	1.51143	6.72e-10	1.24e-07	1.01393	2.67e-07	6.45e-06
ENSG00000124570.13	SERPINB6	coding_mRNA	1.43321	4.08e-09	8.02e-07	1.90821	2.75e-11	1.05e-08	1.90571	8.89e-12	8.78e-10
ENSG00000109107.9	ALDOC	coding_mRNA	1.43107	5.4e-06	0.000295623	1.49357	2.41e-06	0.000101363	2.40607	7.46e-10	3.86e-08
ENSG00000162877.8	PM20D1	coding_mRNA	1.4275	2.82e-09	5.98e-07	1.5825	9.17e-10	1.54e-07	2.6325	9.15e-14	1.93e-11
ENSG00000164309.10	CMYA5	coding_mRNA	1.4275	3.45e-08	4.58e-06	1.6775	7.3e-09	7.93e-07	2.725	5.45e-13	8.35e-11
ENSG00000010704.14	HFE	coding_mRNA	1.42357	3.29e-06	0.00019667	1.66607	3.13e-07	1.84e-05	2.14107	2.52e-09	1.12e-07
ENSG00000082556.6	OPRK1	coding_mRNA	1.42	7.14e-05	0.00242577	0.8925	0.00508367	0.0498476	1.7125	1.86e-05	0.000264872
ENSG00000162437.10	RAVER2	coding_mRNA	1.4075	2.68e-09	5.8e-07	1.415	4.69e-09	5.53e-07	0.5475	0.000675063	0.00591481
ENSG00000189171.9	S100A13	coding_mRNA	1.39964	4.16e-09	8.1e-07	0.814643	8.31e-05	0.00189253	0.424643	0.00983447	0.0534294
ENSG00000147155.6	EBP	coding_mRNA	1.39679	1.19e-08	1.98e-06	1.68429	1e-09	1.64e-07	2.48929	2.02e-13	3.59e-11
ENSG00000054690.9	PLEKHH1	coding_mRNA	1.36643	6.22e-09	1.14e-06	1.89643	2.45e-11	9.71e-09	2.34643	1.71e-13	3.18e-11
ENSG00000146776.10	ATXN7L1	coding_mRNA	1.36607	6.72e-08	8.1e-06	0.658571	0.00142683	0.0188544	0.711071	0.000673028	0.00589852
ENSG00000187546.9	AGMO	coding_mRNA	1.36286	1.01e-06	7.34e-05	1.40286	6.25e-07	3.22e-05	1.59036	4.42e-08	1.34e-06
ENSG00000137486.12	ARRB1	coding_mRNA	1.3575	2.09e-09	4.74e-07	1.6275	1.61e-10	4.09e-08	1.6525	3.02e-10	1.77e-08
ENSG00000168939.6	SPRY3	coding_mRNA	1.35464	1.9e-06	0.00012482	1.67214	1.01e-06	4.87e-05	1.76464	2.94e-08	9.34e-07
ENSG00000100077.10	ADRBK2	coding_mRNA	1.35214	2.19e-07	2.1e-05	1.69964	2.83e-09	3.73e-07	1.99214	1e-10	7.14e-09
ENSG00000122756.10	CNTFR	coding_mRNA	1.35179	2.14e-07	2.06e-05	1.35679	3.62e-07	2.06e-05	2.92679	1.49e-13	2.84e-11
ENSG00000082074.11	FYB	coding_mRNA	1.34214	9.96e-07	7.26e-05	2.09464	8.01e-10	1.38e-07	2.28214	1.19e-10	8.29e-09
ENSG00000164850.10	GPER1	coding_mRNA	1.33679	5.37e-07	4.36e-05	2.41179	4.22e-11	1.46e-08	1.43929	1.99e-07	5.05e-06
ENSG00000170634.8	ACYP2	coding_mRNA	1.3125	6.43e-07	5.08e-05	1.4525	4.51e-06	0.000169163	1.405	5.14e-07	1.16e-05
ENSG00000100292.12	HMOX1	coding_mRNA	1.31071	2.38e-07	2.24e-05	0.888214	3.11e-05	0.000850967	1.00071	2.36e-06	4.43e-05
ENSG00000135776.4	ABCB10	coding_mRNA	1.30893	2.39e-08	3.41e-06	1.83643	3.45e-10	7.46e-08	1.54393	9.97e-10	4.96e-08
ENSG00000173281.4	PPP1R3B	coding_mRNA	1.29679	4.15e-06	0.000237085	1.15179	5.3e-05	0.00131065	0.931786	0.000301141	0.00292436
ENSG00000108511.8	HOXB6	coding_mRNA	1.29179	2.3e-06	0.000146862	2.38679	2.61e-10	6.11e-08	1.84929	1.64e-08	5.61e-07
ENSG00000117479.8	SLC19A2	coding_mRNA	1.28214	7.66e-09	1.34e-06	1.42964	3.77e-09	4.66e-07	1.93714	6.16e-13	9.23e-11
ENSG00000171659.9	GPR34	coding_mRNA	1.27964	1.66e-06	0.000111569	1.12964	3.64e-05	0.00096514	2.36464	2.85e-11	2.42e-09
ENSG00000153064.7	BANK1	coding_mRNA	1.27643	1.24e-07	1.33e-05	1.16143	4.66e-07	2.53e-05	1.66893	3.17e-10	1.84e-08
ENSG00000175198.10	PCCA	coding_mRNA	1.27321	3.04e-07	2.74e-05	0.563214	0.00336751	0.0366503	1.58321	1.52e-09	7.18e-08
CATG00000111785.1	CATG00000111785.1	lncRNA_intergenic	1.27036	1.51e-07	1.54e-05	0.962857	6.58e-06	0.000232717	1.30286	1.82e-07	4.67e-06
ENSG00000004864.9	SLC25A13	coding_mRNA	1.26643	2.48e-08	3.51e-06	0.851429	2.52e-05	0.000720132	2.00143	2.28e-12	2.77e-10
ENSG00000171503.7	ETFDH	coding_mRNA	1.26464	1.34e-05	0.000625893	1.59214	5.71e-07	3e-05	2.36464	7.25e-10	3.76e-08
ENSG00000214855.5	APOC1P1	pseudogene	1.26321	5.73e-05	0.00203511	1.85571	3.26e-07	1.9e-05	1.07571	0.000350204	0.00333652
ENSG00000117791.11	MARCH2	coding_mRNA	1.25714	1.7e-05	0.000753036	1.82214	2.57e-07	1.56e-05	2.08714	8.28e-09	3.13e-07
ENSG00000168291.8	PDHB	coding_mRNA	1.24929	8.84e-07	6.61e-05	1.40429	3.14e-07	1.84e-05	2.13179	5.16e-11	4.01e-09
ENSG00000271880.1	RP11-96C23.5	lncRNA_divergent	1.22071	4.42e-08	5.7e-06	1.24071	7.76e-08	5.73e-06	1.75821	2.14e-10	1.32e-08
ENSG00000205517.8	RGL3	coding_mRNA	1.21893	8.03e-06	0.00040962	1.21143	6.66e-06	0.000235061	1.07393	1.77e-05	0.000254613
ENSG00000175567.4	UCP2	coding_mRNA	1.20929	4.38e-11	1.89e-08	1.35679	2.21e-11	9.43e-09	2.64929	6.81e-18	1.62e-14
ENSG00000187726.4	DNAJB13	coding_mRNA	1.20821	0.000220731	0.00599306	1.53821	3.72e-05	0.000979984	2.40321	2.94e-08	9.34e-07
ENSG00000109929.5	SC5D	coding_mRNA	1.20536	1.27e-08	2.07e-06	1.57286	5.26e-10	1.01e-07	2.00286	8.51e-13	1.2e-10
ENSG00000170262.8	MRAP	coding_mRNA	1.20321	4.52e-07	3.77e-05	1.41071	5.36e-08	4.21e-06	2.05071	4.03e-11	3.26e-09
ENSG00000167508.6	MVD	coding_mRNA	1.2	8.45e-11	3.39e-08	2.1625	8.23e-15	1.71e-11	2.715	5.09e-17	6.52e-14
ENSG00000101695.4	RNF125	coding_mRNA	1.19607	1.46e-07	1.5e-05	1.69107	1.2e-09	1.87e-07	2.76357	7.08e-14	1.62e-11
ENSG00000175806.10	MSRA	coding_mRNA	1.195	1.65e-07	1.66e-05	1.5375	5.36e-09	6.1e-07	1.965	4.01e-11	3.25e-09
ENSG00000100344.6	PNPLA3	coding_mRNA	1.195	2.78e-08	3.81e-06	1.7475	9.22e-11	2.63e-08	2.3775	6.83e-14	1.6e-11
ENSG00000166123.9	GPT2	coding_mRNA	1.1925	1.39e-07	1.43e-05	1.555	2.32e-09	3.15e-07	1.7875	6.55e-11	4.91e-09
ENSG00000133401.11	PDZD2	coding_mRNA	1.19214	9.59e-08	1.09e-05	1.56464	1.26e-09	1.95e-07	2.31464	9.17e-13	1.28e-10
ENSG00000110876.8	SELPLG	coding_mRNA	1.19071	2.98e-06	0.000181439	1.57071	9.97e-08	6.97e-06	1.87321	8.11e-10	4.13e-08
ENSG00000107104.14	KANK1	coding_mRNA	1.18786	1.14e-08	1.9e-06	1.86786	1.16e-11	5.74e-09	2.61786	3.48e-15	1.5e-12
ENSG00000099797.7	TECR	coding_mRNA	1.1875	6.43e-06	0.000343526	1.2425	2.56e-06	0.000105918	2.1925	7.65e-11	5.63e-09
ENSG00000114026.17	OGG1	coding_mRNA	1.18607	3.93e-06	0.000227107	1.43857	4.62e-07	2.51e-05	1.74107	5.53e-09	2.21e-07
ENSG00000214513.3	NOTO	coding_mRNA	1.18	1.93e-05	0.000842802	1.295	4.52e-05	0.00114954	1.46	5.81e-07	1.28e-05
ENSG00000134508.8	CABLES1	coding_mRNA	1.17643	1.97e-08	2.96e-06	1.30393	5.15e-09	5.95e-07	1.97643	2.15e-12	2.64e-10
ENSG00000154144.8	TBRG1	coding_mRNA	1.16714	1.68e-07	1.68e-05	1.27964	1.15e-07	7.8e-06	1.04964	2.41e-06	4.53e-05
ENSG00000185640.5	KRT79	coding_mRNA	1.16643	6.26e-07	4.97e-05	1.04143	7.02e-06	0.000246806	0.718929	0.000416317	0.00385494
ENSG00000165959.7	CLMN	coding_mRNA	1.165	1.77e-08	2.73e-06	1.93	1.13e-12	9.91e-10	2.29	1.33e-13	2.61e-11
ENSG00000165175.11	MID1IP1	coding_mRNA	1.16321	4.44e-09	8.48e-07	1.82321	1.86e-11	8.14e-09	1.88071	3.65e-13	5.95e-11
ENSG00000198589.6	LRBA	coding_mRNA	1.15607	6.84e-11	2.81e-08	1.62357	3.16e-13	3.59e-10	3.52857	4.85e-20	5.12e-16
ENSG00000177076.4	ACER2	coding_mRNA	1.15321	0.000433998	0.010151	1.29071	0.000100204	0.00220277	1.26571	7.28e-05	0.000858677
ENSG00000012660.9	ELOVL5	coding_mRNA	1.15214	3.76e-11	1.67e-08	0.702143	3.45e-07	1.99e-05	1.07964	9.59e-11	6.86e-09
ENSG00000260102.1	LINC01070	lncRNA_intergenic	1.15214	3.07e-05	0.00123255	1.45964	1.49e-06	6.72e-05	0.839643	0.000962002	0.00797156
ENSG00000248360.3	LINC00504	lncRNA_intergenic	1.15107	6.85e-06	0.0003635	0.846071	0.00034351	0.00601191	1.50357	3.37e-06	6.04e-05
ENSG00000146859.6	TMEM140	coding_mRNA	1.14857	0.000394351	0.00940898	1.54607	2.29e-05	0.000663161	2.11107	2.14e-07	5.36e-06
ENSG00000213078.3	RP5-933K21.2	pseudogene	1.14679	1.57e-05	0.000705267	1.25929	5.2e-06	0.000192288	1.28929	8.87e-07	1.88e-05
ENSG00000224940.4	PRRT4	coding_mRNA	1.14607	4.5e-06	0.000253626	1.14107	2.88e-06	0.000118006	1.63857	9.8e-09	3.62e-07
ENSG00000115255.6	REEP6	coding_mRNA	1.14393	2.77e-05	0.00112882	1.31643	3.27e-06	0.000131874	2.38143	1.4e-10	9.34e-09
ENSG00000130876.7	SLC7A10	coding_mRNA	1.14179	2.16e-05	0.000920472	0.591786	0.00564196	0.0536761	1.45429	1.18e-07	3.17e-06
ENSG00000099875.10	MKNK2	coding_mRNA	1.13821	1.21e-07	1.31e-05	1.14321	1.08e-07	7.39e-06	1.61821	2.37e-11	2.04e-09
ENSG00000259494.1	MRPL46	coding_mRNA	1.13643	1.51e-07	1.53e-05	1.35643	1.73e-08	1.65e-06	2.24893	5.83e-13	8.82e-11
ENSG00000158571.6	PFKFB1	coding_mRNA	1.1325	1.61e-08	2.52e-06	1.1075	4.06e-08	3.36e-06	1.745	2.76e-12	3.27e-10
ENSG00000069020.14	MAST4	coding_mRNA	1.12821	1.09e-07	1.2e-05	0.733214	0.000153145	0.00310965	1.49571	8.1e-10	4.13e-08
ENSG00000066027.7	PPP2R5A	coding_mRNA	1.1225	1.16e-10	4.5e-08	1.6075	2.04e-12	1.52e-09	2.16	1.82e-15	9.45e-13
ENSG00000074416.9	MGLL	coding_mRNA	1.11286	2.89e-06	0.000177566	1.38286	1.5e-07	9.91e-06	2.02786	6.24e-11	4.72e-09
ENSG00000231535.1	LINC00278	lncRNA_intergenic	1.10964	1.42e-05	0.000655739	0.824643	0.00182534	0.0227552	1.38464	1.31e-06	2.64e-05
ENSG00000023171.10	GRAMD1B	coding_mRNA	1.10321	3.14e-06	0.000189065	0.863214	0.000124521	0.00263168	1.46321	3.49e-08	1.08e-06
ENSG00000172893.11	DHCR7	coding_mRNA	1.1025	2.24e-06	0.000143726	1.8125	1.31e-09	2.02e-07	2.235	2.03e-11	1.78e-09
ENSG00000147421.13	HMBOX1	coding_mRNA	1.10107	2.94e-06	0.000179733	0.861071	8.7e-05	0.00196443	0.866071	4.88e-05	0.000610586
ENSG00000172164.9	SNTB1	coding_mRNA	1.09214	5.8e-06	0.000313084	0.709643	0.00106409	0.0149395	1.27214	5.35e-07	1.19e-05
ENSG00000119787.9	ATL2	coding_mRNA	1.08821	3.83e-08	4.97e-06	1.23571	1.15e-07	7.82e-06	1.55071	4.66e-11	3.67e-09
ENSG00000165269.8	AQP7	coding_mRNA	1.08536	5.92e-07	4.75e-05	1.32786	5.08e-08	4.06e-06	1.92536	3.02e-11	2.54e-09
ENSG00000149084.7	HSD17B12	coding_mRNA	1.08143	1.43e-10	5.28e-08	1.80143	3.71e-14	5.62e-11	2.23143	6.7e-17	7.68e-14
ENSG00000125434.6	SLC25A35	coding_mRNA	1.08107	3.75e-05	0.00145397	1.26607	3.22e-06	0.000130388	1.50607	2.07e-07	5.23e-06
ENSG00000072778.15	ACADVL	coding_mRNA	1.07679	3.42e-07	3.03e-05	1.17929	7.66e-08	5.69e-06	1.76929	2.24e-11	1.94e-09
ENSG00000009950.11	MLXIPL	coding_mRNA	1.07429	3.41e-07	3.02e-05	0.734286	0.000124591	0.00263168	1.87679	1.16e-10	8.09e-09
ENSG00000072310.12	SREBF1	coding_mRNA	1.07286	1.36e-08	2.21e-06	1.36536	3.12e-10	6.94e-08	1.34536	1.36e-10	9.14e-09
ENSG00000042286.10	AIFM2	coding_mRNA	1.0725	7.97e-06	0.000407727	0.9075	0.000131695	0.00275136	3.4775	1.08e-14	3.63e-12
ENSG00000251244.1	RP13-487K5.1	lncRNA_intergenic	1.07214	0.00143925	0.025221	0.809643	0.00311654	0.0345406	1.29714	2.33e-05	0.000321829
ENSG00000131069.15	ACSS2	coding_mRNA	1.07036	4.27e-10	1.34e-07	1.46536	8.37e-12	4.64e-09	3.37286	7.95e-20	5.29e-16
ENSG00000257303.1	RP11-977G19.11	lncRNA_divergent	1.06893	3.91e-06	0.000226781	2.28143	2.16e-10	5.13e-08	2.59143	7.01e-13	1.03e-10
ENSG00000120049.14	KCNIP2	coding_mRNA	1.06571	3.51e-06	0.000208216	1.68321	1.01e-09	1.64e-07	2.71071	1.92e-13	3.48e-11
ENSG00000143171.8	RXRG	coding_mRNA	1.06393	9.29e-05	0.00300928	1.46893	1.54e-06	6.93e-05	2.35393	3.21e-10	1.86e-08
ENSG00000086848.10	ALG9	coding_mRNA	1.05714	6.13e-07	4.9e-05	1.34714	2.54e-08	2.26e-06	2.10214	2.4e-12	2.9e-10
ENSG00000110497.10	AMBRA1	coding_mRNA	1.05071	1.62e-09	3.78e-07	1.51071	2.03e-11	8.78e-09	1.77571	8.2e-14	1.8e-11
ENSG00000080493.9	SLC4A4	coding_mRNA	1.04786	9.42e-05	0.00304651	1.98036	2.86e-08	2.5e-06	3.73286	1.75e-13	3.23e-11
CATG00000051826.1	CATG00000051826.1	lncRNA_divergent	1.045	1.21e-05	0.000577001	1.09	1.62e-05	0.000497158	1.725	5.56e-09	2.22e-07
ENSG00000079435.5	LIPE	coding_mRNA	1.04464	1.18e-06	8.41e-05	1.04714	9.35e-07	4.53e-05	2.51964	6.95e-14	1.62e-11
ENSG00000113161.11	HMGCR	coding_mRNA	1.03964	2.14e-08	3.14e-06	1.60214	4.55e-10	9e-08	1.92464	2.07e-13	3.66e-11
ENSG00000091409.10	ITGA6	coding_mRNA	1.03786	4.87e-07	4.02e-05	1.26536	8.82e-08	6.28e-06	1.48286	1.33e-08	4.7e-07
ENSG00000087301.4	TXNDC16	coding_mRNA	1.0375	4.25e-07	3.58e-05	1.6575	7.3e-10	1.29e-07	2.0175	3.26e-12	3.78e-10
ENSG00000184227.3	ACOT1	coding_mRNA	1.0375	4.21e-07	3.56e-05	1.4425	1.03e-08	1.05e-06	2.635	1.6e-14	5.03e-12
ENSG00000162194.8	C11orf48	coding_mRNA	1.03536	1.39e-08	2.23e-06	1.67536	1.12e-11	5.73e-09	2.19536	4.38e-15	1.76e-12
ENSG00000182379.9	NXPH4	coding_mRNA	1.03321	2.33e-06	0.000148187	1.25571	5.2e-06	0.000192288	2.00821	4.31e-10	2.43e-08
ENSG00000128311.9	TST	coding_mRNA	1.02571	7.38e-06	0.000385377	1.20321	2.51e-06	0.000103964	1.94321	7.15e-11	5.29e-09
CATG00000018064.1	CATG00000018064.1	coding_mRNA	1.025	0.00316403	0.0452431	1.0975	0.00191121	0.0235957	1.005	0.00547296	0.033437
ENSG00000132142.15	ACACA	coding_mRNA	1.02321	6.05e-08	7.48e-06	1.19321	8.16e-09	8.73e-07	2.43071	7.59e-15	2.71e-12
ENSG00000067064.6	IDI1	coding_mRNA	1.02286	3.33e-09	6.8e-07	1.39536	8.42e-11	2.48e-08	2.42286	1.98e-16	1.71e-13
ENSG00000119686.5	FLVCR2	coding_mRNA	1.02143	3.71e-05	0.0014451	1.20643	4.94e-06	0.000183454	1.64393	2.8e-08	8.95e-07
ENSG00000235043.2	TECRP1	pseudogene	1.02071	8.49e-07	6.39e-05	1.24321	4.57e-08	3.73e-06	2.18821	6.72e-13	9.94e-11
ENSG00000228214.2	LINC00693	lncRNA_intergenic	1.01679	4.62e-05	0.0017221	0.831786	0.000505941	0.0081727	1.06429	1.02e-05	0.000157158
ENSG00000166762.12	CATSPER2	coding_mRNA	1.01571	4.52e-06	0.000254211	0.760714	0.000267205	0.00490196	1.57321	3.36e-09	1.44e-07
ENSG00000104763.13	ASAH1	coding_mRNA	1.01464	1.8e-08	2.75e-06	0.944643	4.71e-07	2.55e-05	1.86714	2.01e-13	3.59e-11
ENSG00000112964.9	GHR	coding_mRNA	1.01429	4.73e-09	8.94e-07	1.09429	7.32e-09	7.94e-07	1.48929	4.08e-12	4.57e-10
ENSG00000134107.4	BHLHE40	coding_mRNA	1.01286	1.01e-05	0.000500157	1.55536	2.94e-09	3.82e-07	1.44786	8.29e-09	3.13e-07
CATG00000105449.1	CATG00000105449.1	lncRNA_divergent	1.01036	4.78e-07	3.97e-05	1.26786	7.77e-08	5.73e-06	1.78536	1.46e-11	1.37e-09
ENSG00000135678.7	CPM	coding_mRNA	1.00821	5.19e-05	0.00188329	0.730714	0.00166784	0.0212945	1.32571	1.55e-06	3.08e-05
ENSG00000152270.4	PDE3B	coding_mRNA	1.0075	2.88e-09	6.07e-07	1.52	2.49e-12	1.76e-09	2.46	4.43e-17	5.9e-14
ENSG00000210127.1	MT-TA	structural_RNA	1.00714	0.000469497	0.0107916	0.812143	0.00408515	0.0422952	0.869643	0.00249771	0.017679
ENSG00000169692.8	AGPAT2	coding_mRNA	1.00643	4.76e-06	0.000266477	0.801429	7.01e-05	0.0016467	1.69643	5.09e-10	2.77e-08
ENSG00000155886.7	SLC24A2	coding_mRNA	1.00286	7.15e-08	8.5e-06	1.19786	7.48e-08	5.58e-06	4.71786	4.73e-18	1.21e-14
ENSG00000124615.13	MOCS1	coding_mRNA	0.999643	0.000462682	0.0106919	1.02964	0.000598931	0.00942757	1.22214	4.93e-05	0.000616248
ENSG00000124126.9	PREX1	coding_mRNA	0.999643	2.13e-05	0.000907687	1.18214	6.7e-07	3.41e-05	1.23464	4.02e-06	7.01e-05
ENSG00000068781.16	STON1-GTF2A1L	coding_mRNA	0.997857	0.000479069	0.0109436	0.647857	0.00477457	0.0473753	1.09036	2.62e-05	0.000355374
ENSG00000165478.6	HEPACAM	coding_mRNA	0.996429	2.94e-05	0.00118792	0.926429	7.6e-05	0.00176424	1.08643	4.78e-06	8.17e-05
ENSG00000072657.4	TRHDE	coding_mRNA	0.991071	5.85e-08	7.26e-06	0.631071	0.000102939	0.00225246	1.59607	7.01e-12	7.12e-10
ENSG00000197147.8	LRRC8B	coding_mRNA	0.990357	2.69e-07	2.46e-05	1.55536	1.12e-10	3.14e-08	1.53536	1.38e-10	9.32e-09
ENSG00000165914.10	TTC7B	coding_mRNA	0.986429	1.86e-05	0.000814915	1.39893	1.67e-07	1.09e-05	2.18893	1.98e-10	1.25e-08
ENSG00000173085.9	COQ2	coding_mRNA	0.983571	2.97e-06	0.000181204	1.03107	3.16e-06	0.000128054	1.28357	1.95e-08	6.52e-07
ENSG00000198130.10	HIBCH	coding_mRNA	0.981071	9.35e-07	6.89e-05	1.27607	1.21e-08	1.2e-06	1.74857	7.04e-12	7.12e-10
ENSG00000254572.2	GLULP3	pseudogene	0.979643	1.63e-06	0.000109914	1.40214	4.79e-08	3.9e-06	1.57714	6.17e-10	3.25e-08
ENSG00000238123.1	MID1IP1-AS1	lncRNA_divergent	0.978929	0.000116676	0.00358655	1.46643	2.34e-06	9.88e-05	1.12143	1.61e-05	0.000233356
ENSG00000080561.9	MID2	coding_mRNA	0.972857	1.29e-05	0.000607057	0.832857	0.000281588	0.00512061	0.937857	2.25e-05	0.000312438
ENSG00000124003.9	MOGAT1	coding_mRNA	0.970357	4.5e-06	0.000253626	2.80286	1.07e-13	1.41e-10	2.64036	3.06e-14	8.4e-12
ENSG00000147383.6	NSDHL	coding_mRNA	0.965357	1.37e-07	1.42e-05	1.48786	7.74e-11	2.36e-08	1.90786	1.7e-13	3.17e-11
ENSG00000042445.9	RETSAT	coding_mRNA	0.965	4.77e-07	3.97e-05	1.16	1.85e-07	1.18e-05	1.68	2.83e-11	2.41e-09
ENSG00000168924.10	LETM1	coding_mRNA	0.964643	1.37e-05	0.000636602	1.45464	2.96e-08	2.57e-06	1.79964	1.86e-10	1.19e-08
ENSG00000130150.7	MOSPD2	coding_mRNA	0.964286	8.94e-08	1.02e-05	0.669286	7.1e-05	0.00166474	1.19179	1.84e-09	8.45e-08
ENSG00000144909.7	OSBPL11	coding_mRNA	0.956071	1.17e-08	1.94e-06	1.95107	4.07e-13	4.1e-10	1.93607	8.02e-15	2.83e-12
ENSG00000151376.12	ME3	coding_mRNA	0.954643	0.000342148	0.0084326	0.784643	0.00181959	0.0227005	1.20964	1.16e-05	0.000176094
ENSG00000114805.12	PLCH1	coding_mRNA	0.954286	0.000103094	0.0032781	1.01679	0.000158613	0.00319919	0.884286	0.000292494	0.00285624
ENSG00000064225.8	ST3GAL6	coding_mRNA	0.953929	5.65e-05	0.00201198	1.14893	6.06e-06	0.000217889	1.18893	3.37e-06	6.04e-05
ENSG00000104325.2	DECR1	coding_mRNA	0.9525	8.78e-09	1.52e-06	1	1.64e-08	1.57e-06	2.1325	1.87e-15	9.59e-13
ENSG00000186479.4	RGS7BP	coding_mRNA	0.95	0.000144602	0.00427508	0.9475	0.000328953	0.0058104	1.355	1.27e-06	2.57e-05
CATG00000052943.1	CATG00000052943.1	lncRNA_intergenic	0.948929	0.000468269	0.0107708	0.991429	0.000460268	0.00761618	0.953929	0.000851036	0.0071896
ENSG00000000938.8	FGR	coding_mRNA	0.948214	2.41e-05	0.00100686	0.748214	0.000339992	0.00596421	1.06321	9.41e-06	0.000146199
ENSG00000235263.1	RP13-392I16.1	lncRNA_intergenic	0.947857	8.91e-05	0.0029132	1.29286	1.01e-05	0.000334764	1.18786	8.2e-06	0.000129624
ENSG00000247746.4	USP51	coding_mRNA	0.946786	7.57e-06	0.000392238	1.33679	2.75e-08	2.42e-06	1.70429	3.29e-10	1.9e-08
ENSG00000152133.10	GPATCH11	coding_mRNA	0.944643	2.69e-07	2.46e-05	0.987143	3.51e-07	2.01e-05	1.39714	1.72e-10	1.12e-08
ENSG00000109339.14	MAPK10	coding_mRNA	0.941786	1.66e-05	0.000740312	1.44179	4.95e-08	3.97e-06	2.18929	9.45e-12	9.24e-10
ENSG00000110042.3	DTX4	coding_mRNA	0.94	9.4e-06	0.000470656	0.97	5.8e-06	0.000210594	0.925	1.67e-05	0.000241162
ENSG00000164211.8	STARD4	coding_mRNA	0.94	6.41e-07	5.08e-05	1.035	2.99e-07	1.77e-05	1.09	1.11e-07	3.01e-06
ENSG00000119673.10	ACOT2	coding_mRNA	0.938214	5.91e-07	4.75e-05	1.46071	1.06e-09	1.7e-07	2.65571	7.26e-15	2.63e-12
ENSG00000151164.14	RAD9B	coding_mRNA	0.935357	0.00161262	0.0273791	0.882857	0.000983293	0.01413	0.782857	0.0022152	0.0160553
ENSG00000184903.5	IMMP2L	coding_mRNA	0.935	2.33e-05	0.000977297	0.58	0.00407494	0.0422139	1.2125	5.02e-07	1.13e-05
ENSG00000149260.10	CAPN5	coding_mRNA	0.935	5.07e-05	0.00184673	1.3175	6.38e-07	3.28e-05	1.05	2.63e-05	0.000355761
ENSG00000085662.9	AKR1B1	coding_mRNA	0.933214	1.12e-05	0.000542938	1.39071	5.77e-08	4.44e-06	1.10321	1.28e-06	2.59e-05
ENSG00000149485.12	FADS1	coding_mRNA	0.9275	4.84e-06	0.000270284	1.7	6.56e-10	1.22e-07	2.26	2.48e-13	4.28e-11
ENSG00000119927.9	GPAM	coding_mRNA	0.924286	1.37e-09	3.43e-07	1.15929	1.13e-10	3.14e-08	1.17429	1.61e-11	1.47e-09
ENSG00000164117.8	FBXO8	coding_mRNA	0.923929	2.86e-06	0.000175906	1.55643	3.3e-09	4.17e-07	1.84393	3.03e-11	2.54e-09
ENSG00000147601.9	TERF1	coding_mRNA	0.922857	2.47e-07	2.3e-05	0.722857	4.69e-05	0.00118548	1.26286	3.07e-09	1.33e-07
ENSG00000185432.10	METTL7A	coding_mRNA	0.920714	2.31e-07	2.19e-05	1.21571	5.72e-08	4.43e-06	1.21071	1.38e-09	6.59e-08
ENSG00000087111.16	PIGS	coding_mRNA	0.918214	1.14e-06	8.11e-05	0.645714	0.000281011	0.00511571	1.31821	1.57e-09	7.38e-08
CATG00000034259.1	CATG00000034259.1	lncRNA_intergenic	0.918214	0.00136431	0.0242139	1.06571	0.000462217	0.00764082	0.885714	0.00140317	0.0109553
ENSG00000262202.3	SNORD3D	lncRNA_intergenic	0.916429	0.000150971	0.00442795	1.07143	3.47e-05	0.0009285	1.00143	4.43e-05	0.000560114
CATG00000113192.1	CATG00000113192.1	lncRNA_divergent	0.916071	0.00107395	0.0202837	0.948571	0.000614563	0.00964623	1.49357	2.71e-06	5e-05
ENSG00000271327.1	RP11-1109F11.3	lncRNA_divergent	0.916071	1.81e-06	0.000119889	1.32857	2.58e-08	2.29e-06	1.49607	3.51e-09	1.49e-07
ENSG00000056972.14	TRAF3IP2	coding_mRNA	0.915	3.87e-07	3.31e-05	1.405	8.8e-10	1.49e-07	1.085	1.95e-08	6.52e-07
ENSG00000260282.1	RP11-265N6.4	pseudogene	0.911429	8.06e-05	0.00267161	0.928929	3.09e-05	0.000849441	1.21143	5.51e-07	1.22e-05
ENSG00000196878.8	LAMB3	coding_mRNA	0.906429	0.000318196	0.0079573	1.21143	1.11e-05	0.000363905	1.14643	1.24e-05	0.00018697
ENSG00000111684.6	LPCAT3	coding_mRNA	0.905	1.02e-07	1.14e-05	1.3775	1.16e-10	3.18e-08	1.36	4.06e-11	3.27e-09
ENSG00000184349.8	EFNA5	coding_mRNA	0.903929	7.58e-06	0.000392238	0.556429	0.00232456	0.0275044	0.951429	3.79e-06	6.65e-05
ENSG00000108272.9	DHRS11	coding_mRNA	0.903929	1.17e-05	0.000562194	2.08893	8.37e-11	2.48e-08	3.10393	8.04e-14	1.77e-11
ENSG00000078124.7	ACER3	coding_mRNA	0.898571	3.72e-06	0.000218233	0.926071	2.34e-06	9.87e-05	1.60607	2.96e-11	2.5e-09
ENSG00000152242.6	C18orf25	coding_mRNA	0.898214	0.000253165	0.00668276	0.798214	0.00215524	0.0259065	1.11071	1.99e-05	0.00028095
ENSG00000187837.2	HIST1H1C	coding_mRNA	0.895714	2.59e-05	0.00107415	1.61571	4.28e-09	5.18e-07	1.63571	4.25e-09	1.76e-07
ENSG00000243444.3	PALM2	coding_mRNA	0.895	2.38e-05	0.00099519	1.355	7.58e-08	5.64e-06	1.76	1.6e-09	7.48e-08
ENSG00000137449.11	CPEB2	coding_mRNA	0.891786	3.45e-06	0.000205253	0.694286	0.000119244	0.00254389	1.12179	1.81e-07	4.65e-06
ENSG00000072518.16	MARK2	coding_mRNA	0.890714	0.000139139	0.00414304	0.683214	0.00176585	0.022205	0.545714	0.00978025	0.0531782
ENSG00000146072.6	TNFRSF21	coding_mRNA	0.889643	5e-06	0.000278081	0.752143	0.000192789	0.00375419	1.04714	5.85e-07	1.29e-05
ENSG00000104450.8	SPAG1	coding_mRNA	0.889286	0.00206451	0.0331717	0.764286	0.00101484	0.0144679	1.07679	5.26e-05	0.000649942
ENSG00000135604.9	STX11	coding_mRNA	0.888929	9.1e-05	0.0029606	1.11143	7.17e-06	0.00025106	1.75643	9.93e-09	3.67e-07
ENSG00000204842.10	ATXN2	coding_mRNA	0.886786	1.18e-05	0.00056524	0.544286	0.00327174	0.0358072	0.926786	8.78e-06	0.000137842
ENSG00000176720.3	BOK	coding_mRNA	0.886429	0.000112177	0.00348366	0.993929	3.56e-05	0.000947242	1.67643	6.68e-09	2.63e-07
ENSG00000122971.4	ACADS	coding_mRNA	0.885714	4.17e-05	0.00158682	1.12571	1.11e-06	5.27e-05	1.51571	2.79e-09	1.22e-07
ENSG00000241978.5	AKAP2	coding_mRNA	0.885714	3.06e-06	0.000185667	1.40071	1.54e-09	2.27e-07	1.92071	2.24e-12	2.72e-10
ENSG00000198959.7	TGM2	coding_mRNA	0.884286	0.000542727	0.0120421	0.969286	0.000350315	0.00610664	0.891786	0.000474868	0.00432953
ENSG00000159348.8	CYB5R1	coding_mRNA	0.882857	0.000535429	0.0119279	0.820357	0.00199831	0.0244802	1.36786	2.53e-06	4.72e-05
ENSG00000254480.1	RP11-23F23.2	lncRNA_intergenic	0.882857	0.000255996	0.00673408	0.997857	0.000895021	0.0131196	1.38286	1.43e-06	2.86e-05
ENSG00000146477.4	SLC22A3	coding_mRNA	0.882857	4.07e-06	0.000234219	1.68536	7.65e-10	1.33e-07	2.94286	5.19e-15	1.98e-12
ENSG00000076706.10	MCAM	coding_mRNA	0.879286	0.000575682	0.0125638	1.52679	1.63e-06	7.25e-05	1.86679	3.17e-08	9.96e-07
ENSG00000186204.10	CYP4F12	coding_mRNA	0.878929	0.00221543	0.0351868	1.07393	0.000371855	0.00641156	1.36643	1.84e-05	0.000263276
CATG00000028145.1	CATG00000028145.1	lncRNA_intergenic	0.878214	0.000274682	0.00707664	0.973214	2.55e-05	0.00072888	0.673214	0.00193234	0.0143523
ENSG00000185942.7	NKAIN3	coding_mRNA	0.877857	0.00259831	0.0391927	0.905357	0.00464614	0.0465454	0.982857	0.00163426	0.0124726
CATG00000069746.1	CATG00000069746.1	uncertain_coding	0.876429	0.000377127	0.00908273	1.03143	8.38e-05	0.0019032	1.13143	2.21e-05	0.00030674
ENSG00000214297.3	ALDOAP2	pseudogene	0.875	1.27e-05	0.00059998	1.39	2.96e-08	2.57e-06	1.03	1.52e-05	0.000222174
ENSG00000169239.8	CA5B	coding_mRNA	0.874286	0.0013223	0.0237087	1.92679	4.31e-08	3.54e-06	2.30679	7.15e-09	2.77e-07
ENSG00000178761.10	FAM219B	coding_mRNA	0.871786	0.000105843	0.00333366	1.43929	1.59e-07	1.04e-05	1.55429	2.47e-08	8e-07
ENSG00000101844.13	ATG4A	coding_mRNA	0.870357	5.2e-05	0.00188329	0.662857	0.0027747	0.0315108	0.782857	0.000135388	0.0014663
ENSG00000143878.8	RHOB	coding_mRNA	0.867143	5e-06	0.000278081	0.757143	7.84e-05	0.00180513	1.27964	8.26e-09	3.13e-07
ENSG00000114378.12	HYAL1	coding_mRNA	0.861786	0.000157497	0.00459505	0.891786	0.000142267	0.00294084	0.851786	0.000141513	0.0015237
ENSG00000237939.1	AC097523.3	pseudogene	0.856071	9.21e-05	0.00299281	0.818571	0.000699707	0.0107508	0.821071	9.27e-05	0.00105394
ENSG00000114480.8	GBE1	coding_mRNA	0.855714	1.37e-08	2.22e-06	1.13321	5.09e-10	9.84e-08	1.69071	4.66e-14	1.18e-11
ENSG00000160285.10	LSS	coding_mRNA	0.852143	9.72e-07	7.12e-05	1.22464	4.87e-08	3.94e-06	2.01464	1.43e-12	1.87e-10
ENSG00000119242.4	CCDC92	coding_mRNA	0.850357	9.29e-05	0.00300928	0.702857	0.000731962	0.0111726	0.702857	0.000551033	0.00495468
ENSG00000196549.6	MME	coding_mRNA	0.849643	2.2e-06	0.000141714	1.23464	4.2e-09	5.1e-07	1.40714	2.14e-10	1.32e-08
ENSG00000170525.14	PFKFB3	coding_mRNA	0.849286	1.11e-05	0.000538236	1.52679	1.33e-09	2.04e-07	1.94929	6.37e-12	6.66e-10
ENSG00000119522.11	DENND1A	coding_mRNA	0.847143	7.4e-05	0.00250261	1.76214	1.49e-08	1.45e-06	2.01964	4.03e-11	3.26e-09
ENSG00000157184.5	CPT2	coding_mRNA	0.846429	0.000214442	0.00584618	1.19393	1.31e-06	6.05e-05	1.81143	1.33e-09	6.37e-08
ENSG00000006831.9	ADIPOR2	coding_mRNA	0.843571	2.6e-06	0.000161449	1.25357	1.01e-07	7.02e-06	1.83857	3.93e-12	4.42e-10
ENSG00000120437.7	ACAT2	coding_mRNA	0.843214	3.56e-07	3.11e-05	1.24821	1.13e-09	1.79e-07	1.97321	1.38e-13	2.71e-11
ENSG00000112759.12	SLC29A1	coding_mRNA	0.842143	2.62e-06	0.000162067	0.669643	8.47e-05	0.00191705	1.04464	4.95e-08	1.48e-06
ENSG00000106628.6	POLD2	coding_mRNA	0.841786	0.000667626	0.0140986	1.02679	5.39e-05	0.00132815	2.11929	3.5e-10	2e-08
ENSG00000196839.8	ADA	coding_mRNA	0.841071	0.00020939	0.00573666	0.683571	0.00132862	0.0177469	0.643571	0.00294735	0.0203463
ENSG00000173599.9	PC	coding_mRNA	0.841071	0.00171486	0.0287239	0.943571	0.00124175	0.0167821	0.856071	0.00144724	0.0112518
ENSG00000104093.9	DMXL2	coding_mRNA	0.84	3.33e-05	0.00131379	0.6675	0.00108634	0.0151242	1.3825	1.14e-08	4.14e-07
ENSG00000157827.15	FMNL2	coding_mRNA	0.838214	4.44e-06	0.00025102	0.888214	7.36e-06	0.000256602	0.765714	2.37e-05	0.000326969
ENSG00000242849.2	ALDOAP1	pseudogene	0.835357	0.00011273	0.00349759	1.20536	1.39e-06	6.37e-05	1.07536	4.9e-06	8.34e-05
ENSG00000120699.8	EXOSC8	coding_mRNA	0.834643	6.75e-05	0.00232717	1.16464	2.29e-05	0.000663161	0.944643	5.68e-06	9.44e-05
ENSG00000171791.10	BCL2	coding_mRNA	0.83	0.000496503	0.0112721	0.6875	0.00381027	0.0402956	1.18	2.77e-06	5.08e-05
ENSG00000158445.7	KCNB1	coding_mRNA	0.827143	1.03e-05	0.000510055	0.642143	0.000666975	0.0103228	2.01464	1.79e-11	1.6e-09
ENSG00000107140.11	TESK1	coding_mRNA	0.826429	6.74e-07	5.26e-05	0.888929	8.78e-07	4.28e-05	1.16143	1e-08	3.7e-07
ENSG00000087085.9	ACHE	coding_mRNA	0.826071	0.000616594	0.013248	0.646071	0.00255175	0.0295924	0.981071	4.89e-05	0.000612509
ENSG00000137824.11	RMDN3	coding_mRNA	0.826071	2.51e-05	0.00104675	0.948571	3.06e-06	0.000124223	1.11607	7.3e-08	2.09e-06
ENSG00000234235.1	BOK-AS1	lncRNA_divergent	0.825357	0.000259189	0.00679859	0.772857	0.00137931	0.0183211	0.610357	0.00990792	0.0537581
ENSG00000161813.16	LARP4	coding_mRNA	0.824643	1.34e-05	0.000627957	0.827143	9.27e-06	0.000312482	1.47714	2.72e-10	1.62e-08
ENSG00000171612.6	SLC25A33	coding_mRNA	0.822143	6.36e-06	0.000339951	1.07464	1.37e-06	6.29e-05	1.96964	3.84e-12	4.34e-10
ENSG00000177666.11	PNPLA2	coding_mRNA	0.820357	1.48e-05	0.000678909	1.14036	8.05e-07	3.97e-05	1.67036	4.84e-10	2.66e-08
ENSG00000243989.3	ACY1	coding_mRNA	0.820357	0.000116143	0.00357677	2.02286	3.13e-10	6.94e-08	2.33536	1.22e-11	1.15e-09
ENSG00000166398.8	KIAA0355	coding_mRNA	0.818571	0.000727693	0.0150517	0.706071	0.00223522	0.0267038	1.03607	5.04e-05	0.000627903
ENSG00000116898.7	MRPS15	coding_mRNA	0.8175	2.81e-06	0.00017291	0.97	2e-07	1.25e-05	1.3275	2.26e-10	1.38e-08
ENSG00000116793.11	PHTF1	coding_mRNA	0.816429	1.62e-05	0.000725235	0.883929	2.15e-05	0.000629211	1.26893	2.4e-08	7.81e-07
ENSG00000186466.4	AQP7P1	pseudogene	0.815	0.000743054	0.0153218	1.3125	4.22e-06	0.000160627	2.1025	8.02e-10	4.1e-08
ENSG00000060491.12	OGFR	coding_mRNA	0.814643	2.59e-05	0.00107343	0.924643	1.34e-05	0.000421064	1.23214	6.14e-08	1.79e-06
ENSG00000189045.9	ANKDD1B	coding_mRNA	0.813214	0.000316881	0.00794231	1.17821	7.08e-06	0.00024859	1.93571	5.05e-10	2.76e-08
ENSG00000184205.10	TSPYL2	coding_mRNA	0.810714	0.000207148	0.0056893	1.10071	7.02e-06	0.000246806	0.780714	0.000324866	0.00312285
ENSG00000079739.11	PGM1	coding_mRNA	0.81	4.03e-07	3.44e-05	1.36	7.06e-11	2.24e-08	2.01	8.33e-15	2.89e-12
ENSG00000141458.8	NPC1	coding_mRNA	0.8075	6.89e-06	0.000364691	1.1675	7.68e-08	5.69e-06	1.35	4.18e-09	1.74e-07
ENSG00000131473.12	ACLY	coding_mRNA	0.806786	7.31e-09	1.29e-06	1.26679	9.28e-12	4.9e-09	1.90179	4.08e-16	2.66e-13
ENSG00000124613.4	ZNF391	coding_mRNA	0.806429	0.000273921	0.00706647	0.691429	0.00106119	0.014905	0.943929	4.62e-05	0.000581637
ENSG00000130734.5	ATG4D	coding_mRNA	0.805714	0.000140957	0.00418592	0.568214	0.00457702	0.0459914	1.01821	8.3e-06	0.000131129
ENSG00000175556.12	LONRF3	coding_mRNA	0.805357	0.00109875	0.0206349	0.965357	0.000253672	0.0047056	1.51786	7.96e-07	1.7e-05
ENSG00000260347.1	MOCS1P1	pseudogene	0.803571	0.000713162	0.0148434	0.973571	9.76e-05	0.00215942	0.613571	0.00654358	0.038568
ENSG00000090674.11	MCOLN1	coding_mRNA	0.800357	6.13e-05	0.00214503	0.720357	0.000303215	0.00542785	1.16286	3.22e-07	7.63e-06
ENSG00000048991.12	R3HDM1	coding_mRNA	0.8	0.00014669	0.00432527	0.775	0.000194842	0.00378531	1.18	4.15e-07	9.58e-06
ENSG00000187741.10	FANCA	coding_mRNA	0.799643	0.000158811	0.00462932	0.632143	0.00271094	0.0309362	1.30214	3.51e-07	8.24e-06
ENSG00000136807.7	CDK9	coding_mRNA	0.799643	4.15e-05	0.00158122	0.894643	1.15e-05	0.000372994	0.969643	1.93e-06	3.71e-05
ENSG00000041880.10	PARP3	coding_mRNA	0.798929	0.00125905	0.0229709	0.761429	0.00319536	0.0352614	0.933929	0.000299016	0.00290798
ENSG00000251333.3	RTN3P1	pseudogene	0.796786	0.000214397	0.00584618	0.819286	0.000255824	0.00472968	1.24679	3.53e-07	8.28e-06
ENSG00000146085.7	MUT	coding_mRNA	0.794643	7.93e-06	0.000406307	0.569643	0.00064867	0.0100911	1.14714	2.31e-08	7.53e-07
ENSG00000121057.8	AKAP1	coding_mRNA	0.794643	0.000170546	0.00489418	0.879643	7.19e-05	0.00168234	1.37714	1.26e-07	3.36e-06
ENSG00000271373.1	NANOGP3	pseudogene	0.793214	0.00129887	0.0234658	1.27071	1.13e-05	0.000366848	1.39821	3.33e-06	5.98e-05
ENSG00000122378.9	FAM213A	coding_mRNA	0.79	1.24e-06	8.78e-05	1.3825	9.73e-10	1.61e-07	1.98	7.73e-14	1.72e-11
ENSG00000185345.14	PARK2	coding_mRNA	0.789286	0.00114139	0.0212556	0.699286	0.00322753	0.0354517	1.36679	1.38e-06	2.77e-05
ENSG00000034693.10	PEX3	coding_mRNA	0.788571	2.83e-05	0.00114755	0.746071	0.00010551	0.00230115	0.991071	4.84e-07	1.1e-05
ENSG00000078618.15	NRD1	coding_mRNA	0.787143	1.4e-06	9.64e-05	1.15214	2.23e-08	2.04e-06	0.917143	1.25e-07	3.33e-06
ENSG00000175309.10	PHYKPL	coding_mRNA	0.786071	0.0010446	0.019876	0.668571	0.00513648	0.0501757	1.14857	1.01e-05	0.000155731
ENSG00000178537.5	SLC25A20	coding_mRNA	0.785357	0.000172877	0.00495455	1.32286	2.57e-07	1.56e-05	2.25786	7.7e-12	7.67e-10
ENSG00000215271.6	HOMEZ	coding_mRNA	0.782857	6.97e-06	0.000367966	1.00036	6.37e-07	3.28e-05	1.58036	3.17e-10	1.84e-08
ENSG00000185909.10	KLHDC8B	coding_mRNA	0.7825	0.00160742	0.0273327	0.6925	0.00448469	0.045379	1.4975	1.15e-06	2.35e-05
ENSG00000228121.1	PHBP3	pseudogene	0.781071	0.000256122	0.00673408	0.541071	0.00556823	0.0531114	0.873571	6.61e-05	0.000790447
ENSG00000167588.8	GPD1	coding_mRNA	0.78	0.000126833	0.00383299	0.925	3.5e-05	0.000933881	1.625	2.97e-09	1.28e-07
ENSG00000113249.8	HAVCR1	coding_mRNA	0.78	0.000262431	0.00685661	1.165	1.86e-06	8.11e-05	1.925	3.68e-10	2.1e-08
ENSG00000213853.5	EMP2	coding_mRNA	0.778929	0.000104203	0.00330162	0.883929	3.65e-05	0.000965598	1.08393	1.66e-06	3.26e-05
ENSG00000205105.5	COX17P1	pseudogene	0.778929	0.00198288	0.0322024	1.05393	0.000305364	0.00544872	1.34893	7.31e-06	0.000117692
ENSG00000185000.5	DGAT1	coding_mRNA	0.777857	2.18e-05	0.000923379	0.820357	1.02e-05	0.00033734	1.26786	7.15e-09	2.77e-07
ENSG00000226031.1	FGF13-AS1	lncRNA_divergent	0.7725	0.00189175	0.0310764	0.935	0.000979124	0.0140977	0.65	0.00561541	0.0341442
ENSG00000131149.13	GSE1	coding_mRNA	0.772143	0.000391854	0.00936284	0.799643	0.000247473	0.0046096	0.672143	0.000617433	0.00549086
ENSG00000147654.10	EBAG9	coding_mRNA	0.771786	1.94e-05	0.000843245	0.759286	7.94e-05	0.0018245	0.556786	0.000783734	0.00671311
ENSG00000081189.9	MEF2C	coding_mRNA	0.771429	0.000123476	0.00375505	0.708929	0.00168801	0.0214369	0.511429	0.0091149	0.0502672
ENSG00000100075.5	SLC25A1	coding_mRNA	0.769643	1.76e-06	0.00011722	1.12464	1.03e-08	1.06e-06	1.91964	9.35e-13	1.29e-10
ENSG00000038382.13	TRIO	coding_mRNA	0.767143	0.000517311	0.0116255	0.582143	0.0032491	0.035618	2.05214	1.18e-09	5.77e-08
ENSG00000183655.11	KLHL25	coding_mRNA	0.766429	0.000446882	0.0103866	0.863929	0.000240982	0.00451299	0.993929	1.98e-05	0.000279312
ENSG00000158234.8	FAIM	coding_mRNA	0.765714	0.000174398	0.00498323	0.730714	0.000481764	0.00788556	0.635714	0.00166675	0.0126837
ENSG00000143324.9	XPR1	coding_mRNA	0.765357	3.16e-05	0.00126167	1.10286	1.74e-07	1.12e-05	0.560357	0.000450698	0.0041284
ENSG00000072210.14	ALDH3A2	coding_mRNA	0.763214	0.000127695	0.00385053	1.03571	4.02e-06	0.000154627	1.28321	6.52e-08	1.89e-06
ENSG00000167306.14	MYO5B	coding_mRNA	0.762143	0.000641507	0.0136948	0.847143	0.000362513	0.00627979	0.852143	0.000172593	0.00181086
ENSG00000160746.8	ANO10	coding_mRNA	0.761429	7.5e-06	0.000389597	0.961429	6.4e-07	3.29e-05	1.18893	7.85e-09	3.01e-07
ENSG00000064393.11	HIPK2	coding_mRNA	0.759643	3.57e-06	0.000211062	0.879643	1.9e-06	8.25e-05	1.52464	3.28e-11	2.73e-09
ENSG00000198794.7	SCAMP5	coding_mRNA	0.758929	0.00135949	0.02418	0.911429	0.000589203	0.00930526	1.78643	1.38e-08	4.87e-07
ENSG00000099282.5	TSPAN15	coding_mRNA	0.755714	3.92e-05	0.00151249	0.478214	0.00491048	0.0484925	0.965714	9.16e-07	1.93e-05
ENSG00000138867.12	GUCD1	coding_mRNA	0.754286	0.000347898	0.00853326	0.749286	0.000355049	0.00617298	0.824286	8.38e-05	0.000966182
ENSG00000159023.14	EPB41	coding_mRNA	0.751786	2.33e-05	0.000977297	0.704286	8.76e-05	0.00197016	1.39179	1.57e-09	7.38e-08
ENSG00000184156.11	KCNQ3	coding_mRNA	0.751786	0.00162651	0.0275446	0.771786	0.00467095	0.0467235	1.27929	1.6e-05	0.000231658
ENSG00000023330.10	ALAS1	coding_mRNA	0.748571	3.98e-05	0.00153116	0.841071	1.15e-05	0.000372994	1.58107	1.23e-10	8.48e-09
ENSG00000245293.2	RP11-286E11.1	lncRNA_divergent	0.745357	0.00279601	0.041368	0.715357	0.00214921	0.0258714	0.900357	0.000442849	0.00406883
ENSG00000214110.3	LDHAP4	pseudogene	0.743929	0.00200569	0.032456	1.05643	1.04e-05	0.000343211	0.766429	0.000396746	0.0036963
ENSG00000005238.15	FAM214B	coding_mRNA	0.743571	0.00128466	0.0232469	0.903571	0.000364138	0.00629809	0.638571	0.00761799	0.0437305
ENSG00000078804.8	TP53INP2	coding_mRNA	0.743571	0.00251577	0.0382775	0.733571	0.00330999	0.0361425	0.983571	0.000154005	0.00163492
ENSG00000253301.1	RP11-513O17.2	lncRNA_intergenic	0.739643	0.000548143	0.0121218	0.747143	0.000539472	0.00862637	0.767143	0.000469819	0.00428467
ENSG00000144233.5	AMMECR1L	coding_mRNA	0.735357	0.000109914	0.00342617	0.810357	5.83e-05	0.00141576	2.54036	4.12e-14	1.07e-11
ENSG00000135093.8	USP30	coding_mRNA	0.732143	3.62e-05	0.00141402	0.902143	3.44e-06	0.0001361	1.47964	2.31e-10	1.4e-08
ENSG00000139116.13	KIF21A	coding_mRNA	0.729643	3.2e-05	0.0012702	0.699643	3.06e-05	0.00084375	1.56214	4.55e-11	3.6e-09
ENSG00000117500.8	TMED5	coding_mRNA	0.729643	3.23e-07	2.89e-05	1.18714	2.42e-10	5.7e-08	1.44214	1.75e-12	2.21e-10
ENSG00000260630.2	SNAI3-AS1	lncRNA_divergent	0.728214	0.000207682	0.00569925	1.02821	2.97e-05	0.000824603	1.17821	6.99e-07	1.51e-05
ENSG00000179627.9	ZBTB42	coding_mRNA	0.726786	0.00149854	0.0259456	0.726786	0.00241905	0.0283301	0.899286	0.000427077	0.00394572
ENSG00000099937.6	SERPIND1	coding_mRNA	0.726429	0.00263246	0.0394573	0.758929	0.00190358	0.0235295	1.41893	1.85e-06	3.58e-05
ENSG00000104549.7	SQLE	coding_mRNA	0.726071	1.27e-05	0.000600439	0.591071	0.000313178	0.00557022	1.60107	1.22e-10	8.45e-09
ENSG00000126432.9	PRDX5	coding_mRNA	0.725714	0.000559975	0.0122902	0.953214	3.26e-05	0.000884721	1.14321	1.99e-06	3.82e-05
ENSG00000091140.8	DLD	coding_mRNA	0.723214	0.000120394	0.0036872	0.750714	0.000531344	0.00852903	1.44821	5.25e-09	2.13e-07
ENSG00000196396.5	PTPN1	coding_mRNA	0.722857	4.7e-05	0.00174207	0.695357	9.01e-05	0.00201708	0.785357	5.98e-06	9.86e-05
ENSG00000083123.10	BCKDHB	coding_mRNA	0.722143	0.000740161	0.015281	1.82214	4.53e-09	5.42e-07	3.09214	4.4e-14	1.13e-11
ENSG00000215049.3	PRDX2P1	pseudogene	0.721429	0.000649206	0.0138239	0.756429	0.000433538	0.00728625	1.14643	7.21e-07	1.55e-05
ENSG00000133065.6	SLC41A1	coding_mRNA	0.720357	9.91e-05	0.00317898	0.677857	0.000555116	0.00881297	0.580357	0.00100272	0.00825234
ENSG00000102069.3	UBE2NL	coding_mRNA	0.719643	0.00263049	0.0394573	0.697143	0.00294285	0.0329357	0.887143	0.000220451	0.00223474
ENSG00000143554.9	SLC27A3	coding_mRNA	0.718214	5.45e-05	0.00195159	0.725714	6.44e-05	0.00153996	2.36571	8.33e-14	1.8e-11
ENSG00000099260.6	PALMD	coding_mRNA	0.717857	4.69e-06	0.000263118	0.672857	1.72e-05	0.000518716	1.10786	2.66e-09	1.17e-07
ENSG00000213062.3	AL021068.1	pseudogene	0.715714	0.00184316	0.0304539	0.598214	0.00473108	0.047014	0.643214	0.00327297	0.0222116
ENSG00000135821.12	GLUL	coding_mRNA	0.713214	0.00103145	0.0196935	1.19071	1.01e-05	0.000334764	1.63071	1.08e-08	3.95e-07
ENSG00000166228.4	PCBD1	coding_mRNA	0.7125	0.000451493	0.0104792	0.9125	4.03e-05	0.00104666	1.305	1.35e-07	3.57e-06
ENSG00000106400.7	ZNHIT1	coding_mRNA	0.711429	0.000205441	0.00565174	0.518929	0.00462376	0.0463491	1.73643	7.91e-10	4.05e-08
ENSG00000250479.4	CHCHD10	coding_mRNA	0.710357	4.83e-05	0.00177941	1.08786	3.67e-07	2.08e-05	2.33286	2.8e-12	3.3e-10
ENSG00000025434.14	NR1H3	coding_mRNA	0.708929	0.00139634	0.0247033	1.36643	3.52e-07	2.01e-05	1.45893	1.13e-07	3.04e-06
ENSG00000136143.9	SUCLA2	coding_mRNA	0.708214	2.79e-06	0.000172423	0.778214	2.35e-06	9.91e-05	1.14821	1.69e-09	7.87e-08
ENSG00000118596.7	SLC16A7	coding_mRNA	0.706429	0.000553835	0.0122071	1.38143	7.61e-07	3.81e-05	1.85143	1.36e-09	6.51e-08
ENSG00000149925.12	ALDOA	coding_mRNA	0.705714	7.9e-07	5.98e-05	1.15571	4.07e-10	8.3e-08	1.40571	1.42e-12	1.86e-10
ENSG00000125730.12	C3	coding_mRNA	0.705714	7.09e-06	0.00037306	1.08821	2e-07	1.25e-05	1.70071	1.87e-12	2.36e-10
ENSG00000165185.10	KIAA1958	coding_mRNA	0.703571	0.000125376	0.00380475	0.993571	4.07e-06	0.000155763	0.818571	4.94e-05	0.000617317
ENSG00000143164.11	DCAF6	coding_mRNA	0.700357	7.15e-05	0.00242698	0.852857	1.08e-05	0.00035478	1.20036	1.8e-08	6.09e-07
CATG00000055979.1	CATG00000055979.1	uncertain_coding	0.7	0.000412853	0.00975941	0.985	7.58e-06	0.000263243	1.4575	3.51e-09	1.49e-07
ENSG00000119139.12	TJP2	coding_mRNA	0.699643	0.00155094	0.0265628	0.587143	0.00431538	0.0440545	0.794643	0.000149129	0.00159282
ENSG00000213965.3	NUDT19	coding_mRNA	0.697143	0.000336357	0.00831764	0.619643	0.000835297	0.0124751	1.03214	9.05e-07	1.91e-05
ENSG00000186480.8	INSIG1	coding_mRNA	0.697143	3e-06	0.000182639	0.864643	3.12e-07	1.84e-05	1.61464	3.23e-12	3.76e-10
ENSG00000197312.7	DDI2	coding_mRNA	0.696071	0.00084006	0.0168675	1.19357	1.94e-06	8.42e-05	1.56857	1.61e-08	5.55e-07
ENSG00000163812.9	ZDHHC3	coding_mRNA	0.695714	3.19e-05	0.00126763	0.705714	8.32e-05	0.00189323	0.925714	2.78e-07	6.69e-06
ENSG00000137124.6	ALDH1B1	coding_mRNA	0.695714	0.00039876	0.00948695	1.35071	2.07e-07	1.29e-05	1.32571	6.27e-08	1.82e-06
ENSG00000142949.12	PTPRF	coding_mRNA	0.693929	4.58e-05	0.00171074	0.566429	0.00126345	0.0170312	1.51143	2.81e-10	1.67e-08
ENSG00000126858.12	RHOT1	coding_mRNA	0.693929	0.000101259	0.00322594	0.856429	6.59e-06	0.000233048	1.01393	5.29e-07	1.18e-05
ENSG00000167315.13	ACAA2	coding_mRNA	0.693929	2.09e-07	2.02e-05	0.881429	8.23e-08	5.96e-06	1.93893	6.42e-16	3.95e-13
ENSG00000077420.11	APBB1IP	coding_mRNA	0.693571	2.73e-05	0.00111707	1.32107	1.22e-09	1.9e-07	2.14107	3.04e-14	8.4e-12
ENSG00000163485.11	ADORA1	coding_mRNA	0.693571	0.0014338	0.025152	1.70107	1.8e-08	1.71e-06	1.78357	7.35e-09	2.84e-07
ENSG00000141232.4	TOB1	coding_mRNA	0.691786	2.34e-06	0.000148273	0.694286	3.56e-06	0.000140476	0.531786	2.72e-05	0.000367818
ENSG00000116962.10	NID1	coding_mRNA	0.691429	7.87e-07	5.98e-05	0.433929	0.000484551	0.00791288	0.801429	4.59e-08	1.38e-06
ENSG00000133318.9	RTN3	coding_mRNA	0.691429	0.000361008	0.00877073	0.766429	0.000196198	0.00380055	1.34643	3.89e-08	1.19e-06
ENSG00000269636.1	AC010441.1	coding_mRNA	0.690714	0.000114669	0.00354175	0.888214	2.32e-05	0.000670321	1.22821	1.89e-08	6.33e-07
ENSG00000260362.1	RP11-297M9.1	coding_mRNA	0.6875	0.00172606	0.0288632	0.675	0.00220926	0.0264317	0.59	0.0060979	0.0364122
ENSG00000132840.5	BHMT2	coding_mRNA	0.6875	0.000285727	0.00732149	0.9425	7.64e-06	0.000264991	1.305	8.07e-08	2.27e-06
ENSG00000103335.15	PIEZO1	coding_mRNA	0.685714	0.000123268	0.00375448	0.748214	9.81e-05	0.0021673	0.860714	5.04e-06	8.52e-05
ENSG00000198624.8	CCDC69	coding_mRNA	0.685714	0.000419146	0.00987308	0.903214	4.15e-05	0.00107077	0.733214	0.000118937	0.00131118
ENSG00000155313.11	USP25	coding_mRNA	0.684286	8.41e-06	0.000427208	0.954286	2.6e-07	1.57e-05	0.539286	0.000185381	0.00192741
CATG00000092477.1	CATG00000092477.1	lncRNA_intergenic	0.683571	0.000182024	0.00517028	0.978571	3.65e-06	0.000142996	0.791071	2.62e-05	0.000355075
ENSG00000137266.10	SLC22A23	coding_mRNA	0.681071	0.000150465	0.00442177	0.683571	0.000295198	0.00531937	1.23107	5.41e-08	1.6e-06
ENSG00000197932.3	F8A1	coding_mRNA	0.678571	0.000222658	0.00602573	0.983571	8.73e-06	0.000296595	0.788571	4.79e-05	0.000600834
ENSG00000254990.1	RP11-108O10.2	lncRNA_intergenic	0.677857	0.0027309	0.0406033	0.855357	0.000550995	0.00876047	1.42036	8.97e-06	0.000140581
ENSG00000001084.6	GCLC	coding_mRNA	0.676429	0.000228455	0.00614959	0.983929	2.5e-06	0.000103871	1.22143	1.91e-07	4.87e-06
ENSG00000157514.12	TSC22D3	coding_mRNA	0.675714	0.000276519	0.00711293	0.710714	0.000336489	0.00591524	1.07321	8.23e-07	1.76e-05
ENSG00000138796.11	HADH	coding_mRNA	0.675714	2.21e-06	0.000141918	1.02071	6.33e-09	7.04e-07	1.67571	1.19e-13	2.37e-11
ENSG00000072062.9	PRKACA	coding_mRNA	0.674643	1.45e-05	0.000666547	0.829643	2.67e-06	0.000110041	1.36714	1.73e-10	1.12e-08
ENSG00000260898.1	ADPGK-AS1	lncRNA_divergent	0.674286	0.00105521	0.0200092	0.916786	2.66e-05	0.000753943	0.789286	0.000632894	0.00559991
ENSG00000106771.8	TMEM245	coding_mRNA	0.672143	7.05e-05	0.00240432	0.899643	3.27e-06	0.000131874	1.48464	1.77e-09	8.16e-08
ENSG00000114302.11	PRKAR2A	coding_mRNA	0.671071	0.000656773	0.0139299	1.05607	3.08e-06	0.000125107	1.00107	4.51e-06	7.76e-05
ENSG00000124588.15	NQO2	coding_mRNA	0.669643	0.000118927	0.00364563	0.572143	0.00107182	0.0150061	2.00214	9.21e-13	1.28e-10
ENSG00000066583.7	ISOC1	coding_mRNA	0.669643	0.000182864	0.00518063	1.06464	2.13e-06	9.05e-05	1.63964	1.27e-09	6.12e-08
ENSG00000070601.5	FRMPD1	coding_mRNA	0.668929	0.00101489	0.0194491	0.583929	0.00367235	0.0391106	0.681429	0.000778629	0.00667454
ENSG00000260105.2	AOC4P	pseudogene	0.668929	0.000705603	0.0147414	0.696429	0.000631188	0.00986992	1.04393	2.34e-06	4.4e-05
ENSG00000089220.4	PEBP1	coding_mRNA	0.668929	0.00112105	0.020959	1.46143	5.24e-07	2.8e-05	1.43893	7.87e-08	2.22e-06
ENSG00000128590.4	DNAJB9	coding_mRNA	0.668571	5.58e-05	0.00198793	0.768571	2.79e-05	0.000781091	1.13357	3.82e-08	1.18e-06
ENSG00000065833.7	ME1	coding_mRNA	0.668571	2.84e-07	2.59e-05	1.52357	1.39e-13	1.71e-10	2.18107	1.72e-16	1.56e-13
ENSG00000162241.8	SLC25A45	coding_mRNA	0.667857	0.00271233	0.0403996	1.01286	4.92e-05	0.0012288	0.790357	0.000603966	0.00537973
ENSG00000163931.11	TKT	coding_mRNA	0.667857	0.000282187	0.00724753	0.825357	2.59e-05	0.000737559	1.87536	2.96e-11	2.5e-09
ENSG00000134962.6	KLB	coding_mRNA	0.666429	8.11e-06	0.0004123	0.838929	6.89e-07	3.49e-05	2.72893	9.54e-17	9.92e-14
ENSG00000160211.11	G6PD	coding_mRNA	0.665714	0.00010434	0.00330162	1.13571	8.57e-08	6.16e-06	1.34821	2.35e-09	1.05e-07
ENSG00000166575.12	TMEM135	coding_mRNA	0.661429	0.000182032	0.00517028	0.523929	0.00280854	0.0317683	1.15393	6.53e-08	1.89e-06
CATG00000035337.1	CATG00000035337.1	uncertain_coding	0.661429	0.00268532	0.040051	0.901429	0.000103271	0.00225677	0.993929	5.45e-05	0.000671014
ENSG00000138073.9	PREB	coding_mRNA	0.661071	0.000809843	0.016394	0.703571	0.00065452	0.0101593	1.19857	1.72e-07	4.45e-06
ENSG00000136877.10	FPGS	coding_mRNA	0.66	0.000866295	0.0172257	0.6425	0.00155018	0.0202034	0.72	0.000446353	0.0040965
ENSG00000116133.7	DHCR24	coding_mRNA	0.657857	3.21e-05	0.00127212	1.22286	1.06e-08	1.07e-06	1.95536	6.33e-13	9.44e-11
ENSG00000100280.12	AP1B1	coding_mRNA	0.655714	0.00134098	0.0239533	0.865714	0.000113527	0.00244395	1.31071	3.25e-07	7.67e-06
ENSG00000169710.6	FASN	coding_mRNA	0.655714	4.1e-06	0.000235127	1.20321	9.73e-10	1.61e-07	1.53571	2.42e-12	2.91e-10
ENSG00000250229.1	RP11-397D21.1	pseudogene	0.655357	0.00397181	0.0539414	0.622857	0.00439651	0.0446907	1.23786	1.92e-06	3.7e-05
ENSG00000177105.9	RHOG	coding_mRNA	0.653929	0.00252942	0.0384148	0.848929	0.000341036	0.00597937	0.928929	0.00012432	0.00136015
ENSG00000073417.10	PDE8A	coding_mRNA	0.649643	6.64e-05	0.00229682	0.947143	1.07e-06	5.13e-05	0.954643	5.3e-07	1.18e-05
ENSG00000171621.9	SPSB1	coding_mRNA	0.649286	0.000365269	0.00885485	0.776786	0.000159208	0.00320924	0.551786	0.00231105	0.0166088
ENSG00000233588.1	CYP51P2	pseudogene	0.648571	0.00327936	0.0465123	0.891071	0.000256171	0.00473347	1.21607	2.04e-06	3.89e-05
ENSG00000062282.10	DGAT2	coding_mRNA	0.646786	0.000210533	0.00575851	0.669286	0.000262492	0.00482881	1.31679	8.71e-09	3.28e-07
ENSG00000134871.13	COL4A2	coding_mRNA	0.646786	0.000786088	0.0160106	1.03929	6.13e-06	0.000219616	0.959286	1.31e-05	0.000195243
ENSG00000106348.12	IMPDH1	coding_mRNA	0.645357	0.000373577	0.00900375	0.865357	3.16e-05	0.000862438	0.590357	0.00109047	0.00881599
CATG00000001620.1	CATG00000001620.1	lncRNA_antisense	0.644643	0.0010166	0.0194491	1.04464	9.79e-06	0.00032723	0.582143	0.00188935	0.0140676
ENSG00000005249.8	PRKAR2B	coding_mRNA	0.643571	2.19e-06	0.000141177	1.00107	9.44e-09	9.84e-07	2.14607	3.65e-15	1.54e-12
ENSG00000144136.6	SLC20A1	coding_mRNA	0.642143	3.6e-05	0.00140894	1.48464	5.86e-10	1.11e-07	0.782143	3.3e-06	5.94e-05
ENSG00000162413.12	KLHL21	coding_mRNA	0.640714	0.000563642	0.0123578	0.805714	6.51e-05	0.00154989	0.870714	1.27e-05	0.000191491
ENSG00000137133.6	HINT2	coding_mRNA	0.640714	6.44e-05	0.00223746	1.04571	1.1e-06	5.23e-05	1.40071	1.24e-09	6.03e-08
ENSG00000144908.9	ALDH1L1	coding_mRNA	0.639286	0.000251945	0.00666642	0.861786	1.01e-05	0.000335537	2.56429	1.43e-14	4.6e-12
ENSG00000139354.6	GAS2L3	coding_mRNA	0.638929	0.000933032	0.0182975	1.18643	5.86e-07	3.06e-05	1.33643	1.44e-07	3.78e-06
ENSG00000004799.7	PDK4	coding_mRNA	0.638571	9.6e-07	7.05e-05	1.10107	3.56e-10	7.58e-08	1.92357	4.66e-15	1.85e-12
ENSG00000249245.2	RP11-557J10.3	pseudogene	0.638214	0.00144451	0.0252865	1.00571	2.53e-05	0.000724472	1.02321	5.46e-06	9.13e-05
ENSG00000056998.14	GYG2	coding_mRNA	0.635714	2.11e-05	0.000903242	0.680714	1.34e-05	0.000421064	1.38821	3.8e-11	3.11e-09
ENSG00000251432.2	RP11-420A23.1	lncRNA_divergent	0.631786	0.00249108	0.0380704	1.32679	1.2e-06	5.59e-05	0.929286	0.000131242	0.00142884
ENSG00000189077.6	TMEM120A	pseudogene	0.630714	0.00013206	0.00395347	1.14821	5.83e-08	4.47e-06	1.18321	1.23e-08	4.42e-07
ENSG00000169313.9	P2RY12	coding_mRNA	0.63	0.000203727	0.00561855	1.4575	1.17e-09	1.83e-07	0.8125	4.91e-06	8.36e-05
ENSG00000240303.3	ACAD11	coding_mRNA	0.628571	0.000414036	0.00978043	0.631071	0.000633345	0.00989899	1.88107	1.27e-10	8.69e-09
ENSG00000104904.8	OAZ1	coding_mRNA	0.6275	6.66e-06	0.000354416	0.4975	0.000279968	0.00509953	0.9475	1.84e-08	6.18e-07
ENSG00000003402.15	CFLAR	coding_mRNA	0.625714	1.35e-05	0.000627957	0.518214	0.000286116	0.00519638	0.685714	3.63e-06	6.41e-05
ENSG00000116005.7	PCYOX1	coding_mRNA	0.625357	1.63e-06	0.000109914	0.510357	0.00010728	0.00233517	1.05786	1.87e-10	1.19e-08
ENSG00000123080.6	CDKN2C	coding_mRNA	0.625357	6.16e-05	0.00215381	0.777857	1.42e-05	0.000440727	1.56536	1.78e-11	1.6e-09
ENSG00000158186.8	MRAS	coding_mRNA	0.625	2.29e-05	0.000963314	1.165	2.07e-08	1.93e-06	1.4725	8.02e-11	5.85e-09
ENSG00000184719.7	RNLS	coding_mRNA	0.625	0.00193462	0.0316504	0.74	0.000458038	0.00758304	2.4375	4.49e-10	2.5e-08
ENSG00000132471.7	WBP2	coding_mRNA	0.6225	0.00287261	0.042201	1.15	8.14e-06	0.000279552	1.3825	1.33e-07	3.53e-06
ENSG00000138293.15	NCOA4	coding_mRNA	0.619643	4.14e-05	0.00157939	0.974643	1.03e-07	7.13e-06	1.25714	3.36e-09	1.44e-07
ENSG00000226742.3	HSBP1L1	coding_mRNA	0.617143	0.000120711	0.0036935	1.18964	3.11e-08	2.68e-06	1.44714	1.78e-08	6.05e-07
ENSG00000165029.11	ABCA1	coding_mRNA	0.616071	1.5e-05	0.000685327	0.628571	4.24e-05	0.00108901	1.04857	3.3e-09	1.42e-07
ENSG00000122779.12	TRIM24	coding_mRNA	0.613929	0.000712212	0.0148329	0.631429	0.000892151	0.0130833	0.521429	0.00300264	0.0206509
ENSG00000207501.1	RNVU1-14	small_RNA	0.610714	0.000595091	0.0129111	0.660714	0.000484537	0.00791288	0.670714	0.000216261	0.00219964
ENSG00000066322.8	ELOVL1	coding_mRNA	0.610714	0.00126431	0.0230416	0.885714	7e-05	0.0016467	1.02321	2.14e-06	4.08e-05
ENSG00000142327.7	RNPEPL1	coding_mRNA	0.608571	0.000766309	0.0156947	0.726071	0.000331685	0.00584934	0.943571	1.06e-05	0.000162357
ENSG00000132170.15	PPARG	coding_mRNA	0.608214	0.000533366	0.0118979	0.663214	0.000349616	0.00609765	1.30821	1.01e-08	3.71e-07
ENSG00000109066.9	TMEM104	coding_mRNA	0.608214	0.000821526	0.0166002	1.11071	1.16e-06	5.42e-05	1.54571	6.82e-09	2.68e-07
CATG00000011915.1	CATG00000011915.1	uncertain_coding	0.607857	0.0039793	0.054021	0.845357	0.000248866	0.00462935	1.53036	5.09e-08	1.52e-06
ENSG00000086289.7	EPDR1	coding_mRNA	0.607143	0.00249361	0.0380704	0.714643	0.0013848	0.0183696	1.93964	1.04e-09	5.16e-08
ENSG00000196715.5	VKORC1L1	coding_mRNA	0.606429	3.16e-05	0.00126167	0.858929	6.59e-07	3.36e-05	1.63393	1.04e-11	9.99e-10
ENSG00000188958.5	UTS2B	coding_mRNA	0.605357	0.000918825	0.0180722	1.17786	1.14e-06	5.36e-05	0.770357	0.000127224	0.00138919
ENSG00000065060.12	UHRF1BP1	coding_mRNA	0.602143	0.00206148	0.0331552	0.722143	0.000358142	0.00621701	0.977143	7.8e-06	0.000124252
ENSG00000117054.9	ACADM	coding_mRNA	0.602143	2.75e-05	0.00112329	0.809643	1.31e-06	6.05e-05	1.18214	7.09e-10	3.68e-08
ENSG00000167291.11	TBC1D16	coding_mRNA	0.599643	0.00279206	0.0413464	0.599643	0.00269973	0.0308909	0.742143	0.000502679	0.0045581
ENSG00000019995.6	ZRANB1	coding_mRNA	0.598929	0.000110896	0.00345357	0.726429	2.69e-05	0.000759459	0.633929	0.000130261	0.00141909
ENSG00000130066.12	SAT1	coding_mRNA	0.5975	0.000606446	0.0130892	1.11	1.69e-06	7.51e-05	0.6425	0.000258566	0.00256867
ENSG00000273184.1	RP11-212P7.3	lncRNA_divergent	0.596071	9.6e-05	0.00309282	1.37107	7.95e-10	1.38e-07	1.76607	1.58e-12	2.03e-10
ENSG00000198382.4	UVRAG	coding_mRNA	0.595	0.000486501	0.0110829	0.7875	1.65e-05	0.000502695	1.4975	4.08e-10	2.31e-08
ENSG00000226085.2	UQCRFS1P1	pseudogene	0.594643	0.00127942	0.0231983	0.847143	0.00021071	0.00403931	1.23714	2.46e-07	6.02e-06
ENSG00000151093.3	OXSM	coding_mRNA	0.593929	0.00135298	0.0241287	0.658929	0.00100723	0.014392	1.05893	4.74e-06	8.11e-05
ENSG00000229357.1	RP11-235D19.3	pseudogene	0.592857	0.0011808	0.0218428	0.782857	0.00023622	0.00444634	1.18536	2.91e-07	6.97e-06
ENSG00000120137.6	PANK3	coding_mRNA	0.591786	5.08e-05	0.00184729	0.576786	8.31e-05	0.00189253	0.771786	6e-07	1.32e-05
ENSG00000147684.3	NDUFB9	coding_mRNA	0.591786	0.000323569	0.00806741	0.556786	0.00112328	0.0155473	1.01429	4.2e-07	9.66e-06
ENSG00000162378.8	ZYG11B	coding_mRNA	0.591786	2.83e-05	0.00114755	0.849286	3.89e-06	0.000151325	1.24929	8.92e-10	4.52e-08
ENSG00000106049.4	HIBADH	coding_mRNA	0.591071	0.00314716	0.0450315	0.596071	0.00446416	0.0452401	1.28357	2.9e-07	6.93e-06
ENSG00000152409.8	JMY	coding_mRNA	0.59	0.000929208	0.0182441	0.4925	0.00574428	0.0544471	1.065	5.95e-07	1.31e-05
ENSG00000133935.6	C14orf1	coding_mRNA	0.583571	0.00151132	0.0260989	0.533571	0.00300854	0.0334909	1.14857	2.2e-07	5.47e-06
ENSG00000095321.12	CRAT	coding_mRNA	0.583571	0.00213553	0.0341315	0.673571	0.00109199	0.015189	1.13107	5.21e-07	1.17e-05
ENSG00000166170.9	BAG5	coding_mRNA	0.583571	5.21e-05	0.00188528	0.828571	4.71e-06	0.000176146	1.12357	7.53e-09	2.9e-07
ENSG00000069849.6	ATP1B3	coding_mRNA	0.581786	0.000355443	0.0086699	0.794286	1.6e-05	0.000489615	0.536786	0.00219096	0.0159177
ENSG00000145362.12	ANK2	coding_mRNA	0.581786	0.00016374	0.00472758	1.10679	3.72e-08	3.15e-06	0.529286	0.000271333	0.00268029
ENSG00000147251.11	DOCK11	coding_mRNA	0.581786	4.72e-05	0.00174485	0.979286	7.04e-08	5.27e-06	1.27179	2.21e-10	1.36e-08
ENSG00000178127.8	NDUFV2	coding_mRNA	0.581429	0.000518465	0.0116357	0.508929	0.00182072	0.0227061	0.718929	6.06e-05	0.000733596
ENSG00000176046.7	NUPR1	coding_mRNA	0.581429	7.33e-05	0.00248089	0.976429	1.54e-07	1.01e-05	1.02893	7.87e-09	3.01e-07
ENSG00000073060.11	SCARB1	coding_mRNA	0.578929	0.000230533	0.00619349	0.766429	1.54e-05	0.000473709	2.25893	4.33e-14	1.12e-11
ENSG00000136854.13	STXBP1	coding_mRNA	0.575714	0.000100249	0.00320296	0.645714	4.3e-05	0.0011032	0.800714	8.68e-07	1.84e-05
ENSG00000006007.7	GDE1	coding_mRNA	0.574286	0.000512956	0.0115727	0.746786	5.09e-05	0.0012662	1.52179	4.47e-10	2.49e-08
ENSG00000116717.7	GADD45A	coding_mRNA	0.573571	0.00171619	0.028727	0.591071	0.00243262	0.028459	0.696071	0.000307013	0.0029713
ENSG00000140905.5	GCSH	coding_mRNA	0.573571	8e-05	0.00265637	0.621071	8.09e-05	0.00184912	1.07357	2.04e-08	6.77e-07
ENSG00000185825.11	BCAP31	coding_mRNA	0.571786	0.00138279	0.0245037	1.03679	1.9e-06	8.26e-05	1.34929	6.83e-09	2.68e-07
ENSG00000086712.8	TXLNG	coding_mRNA	0.570357	0.00100322	0.0193367	1.05286	5.74e-06	0.000208643	1.50536	1.92e-09	8.75e-08
ENSG00000172901.15	AQPEP	coding_mRNA	0.57	0.000614435	0.0132187	1.17	8.55e-08	6.16e-06	1.535	3.83e-10	2.17e-08
ENSG00000182118.5	FAM89A	coding_mRNA	0.57	0.00136225	0.0241903	1.08	7.98e-07	3.94e-05	1.6825	1.72e-10	1.12e-08
ENSG00000137274.8	BPHL	coding_mRNA	0.569286	0.000182539	0.00518024	0.836786	6.31e-06	0.000224854	2.09179	1.57e-13	2.97e-11
ENSG00000166347.14	CYB5A	coding_mRNA	0.564643	0.000194543	0.00543283	0.949643	1.33e-06	6.14e-05	1.10714	1.6e-08	5.53e-07
ENSG00000012232.4	EXTL3	coding_mRNA	0.564643	0.00188597	0.0310071	1.26714	8.82e-08	6.28e-06	0.859643	4.15e-05	0.000529514
ENSG00000165806.15	CASP7	coding_mRNA	0.564286	0.00288335	0.0423027	0.884286	0.000352299	0.00613481	1.31179	8.77e-08	2.44e-06
ENSG00000167815.7	PRDX2	coding_mRNA	0.563571	6.01e-05	0.00211439	0.393571	0.0043732	0.0445391	0.983571	2.15e-08	7.09e-07
ENSG00000086061.11	DNAJA1	coding_mRNA	0.563214	4.67e-05	0.00173243	0.603214	5.51e-05	0.0013524	1.11071	2.49e-09	1.11e-07
ENSG00000105379.5	ETFB	coding_mRNA	0.561786	0.00277977	0.0412194	0.991786	1.24e-05	0.000394264	1.44429	1.9e-08	6.37e-07
ENSG00000178425.9	NT5DC1	coding_mRNA	0.559286	0.00225489	0.0356115	0.564286	0.00314163	0.0347607	0.724286	0.000186853	0.00193674
ENSG00000245848.2	CEBPA	coding_mRNA	0.558214	0.00276054	0.0409892	0.715714	0.000689105	0.0106306	1.19821	7.82e-07	1.68e-05
ENSG00000163710.3	PCOLCE2	coding_mRNA	0.558214	0.000187803	0.00529349	0.765714	2.36e-05	0.000681183	1.56571	4.45e-11	3.53e-09
ENSG00000141437.7	SLC25A52	coding_mRNA	0.555	0.000556865	0.0122496	0.55	0.00112832	0.0155977	0.795	2.57e-05	0.000349784
ENSG00000135953.6	MFSD9	coding_mRNA	0.554643	0.000842308	0.0168773	0.772143	4.44e-05	0.00113085	1.24964	1.09e-06	2.23e-05
ENSG00000137814.5	HAUS2	coding_mRNA	0.554286	0.00127138	0.023145	0.961786	7.69e-06	0.000266479	1.12679	4.13e-07	9.56e-06
ENSG00000143158.6	MPC2	coding_mRNA	0.5525	8.61e-05	0.0028238	1.1625	9.83e-09	1.02e-06	1.185	9.18e-10	4.62e-08
ENSG00000144320.9	KIAA1715	coding_mRNA	0.552143	0.00107603	0.0203115	0.637143	0.00065817	0.0102055	1.55714	6.87e-10	3.59e-08
ENSG00000263426.1	RN7SL471P	lncRNA_intergenic	0.551786	0.00186491	0.0307064	0.576786	0.00175754	0.0221255	1.05679	2.93e-06	5.35e-05
ENSG00000115233.7	PSMD14	coding_mRNA	0.551071	0.00020039	0.0055449	0.478571	0.00322715	0.0354517	0.803571	1.87e-06	3.61e-05
ENSG00000172115.4	CYCS	coding_mRNA	0.549643	1.24e-05	0.000589437	0.907143	1.48e-08	1.45e-06	1.64214	4.8e-14	1.2e-11
ENSG00000196505.6	GDAP2	coding_mRNA	0.548571	0.000242827	0.0064923	0.493571	0.00165954	0.0212131	0.866071	8.49e-07	1.81e-05
ENSG00000162496.4	DHRS3	coding_mRNA	0.546071	0.0016343	0.0276345	0.813571	0.000121724	0.00258362	0.526071	0.00245759	0.017462
ENSG00000185813.6	PCYT2	coding_mRNA	0.546071	0.00130579	0.0235602	1.26357	3.91e-08	3.29e-06	1.78857	3.94e-11	3.21e-09
ENSG00000142687.13	KIAA0319L	coding_mRNA	0.545714	0.00170966	0.0286609	0.553214	0.00332005	0.0362353	0.440714	0.00853125	0.0477853
ENSG00000117335.14	CD46	coding_mRNA	0.545714	0.000202994	0.00560763	0.468214	0.0009433	0.0137065	0.730714	2.62e-06	4.84e-05
ENSG00000067704.8	IARS2	coding_mRNA	0.545714	4.13e-05	0.00157728	0.840714	7.65e-07	3.82e-05	1.31821	2.07e-11	1.81e-09
ENSG00000135018.9	UBQLN1	coding_mRNA	0.543929	9.95e-05	0.00318769	0.738929	3.33e-06	0.000133117	0.973929	1.63e-08	5.6e-07
ENSG00000047634.10	SCML1	coding_mRNA	0.543571	0.00370988	0.0513486	0.791071	0.000167581	0.00335571	1.00107	6.64e-06	0.000108148
ENSG00000017373.11	SRCIN1	coding_mRNA	0.5425	0.00195136	0.0318148	0.8625	3.28e-05	0.000889534	1.0225	4.56e-06	7.84e-05
ENSG00000011405.9	PIK3C2A	coding_mRNA	0.540357	0.000440769	0.0102877	0.717857	2.93e-05	0.000816164	0.700357	2.68e-05	0.000362032
ENSG00000165006.9	UBAP1	coding_mRNA	0.536071	0.00305054	0.0439987	1.01607	7.9e-06	0.00027272	0.926071	2.16e-05	0.000301634
ENSG00000112972.10	HMGCS1	coding_mRNA	0.533929	1.34e-05	0.000626768	0.711429	1.14e-06	5.38e-05	2.44393	3.76e-17	5.2e-14
ENSG00000049246.10	PER3	coding_mRNA	0.532143	0.00101294	0.0194294	0.547143	0.00126783	0.017079	1.35714	2.65e-09	1.17e-07
ENSG00000148248.9	SURF4	coding_mRNA	0.531429	0.00130918	0.0235602	0.583929	0.000941492	0.0136862	1.12643	9.2e-08	2.54e-06
ENSG00000054793.9	ATP9A	coding_mRNA	0.527857	0.000784933	0.0160044	0.847857	6.31e-06	0.000224854	0.677857	5.65e-05	0.000689472
ENSG00000051620.6	HEBP2	coding_mRNA	0.527143	0.0024505	0.0376928	1.33464	1.94e-08	1.83e-06	1.45964	1.6e-08	5.53e-07
ENSG00000133835.10	HSD17B4	coding_mRNA	0.521786	0.000249507	0.00661769	0.636786	8.03e-05	0.00183728	1.06929	8.79e-09	3.3e-07
ENSG00000001630.11	CYP51A1	coding_mRNA	0.521071	9.26e-05	0.00300529	0.613571	3.02e-05	0.000836138	1.59857	6.65e-12	6.89e-10
ENSG00000101938.10	CHRDL1	coding_mRNA	0.519286	1.79e-05	0.000791606	0.541786	9.23e-05	0.00205531	1.37679	1.54e-12	2e-10
ENSG00000165996.9	PTPLA	coding_mRNA	0.518214	0.00289343	0.0424001	0.850714	3.51e-05	0.000936066	0.943214	3.96e-06	6.91e-05
ENSG00000073578.12	SDHA	coding_mRNA	0.5175	0.00255101	0.0386721	0.575	0.000970814	0.0140144	1.085	2.67e-07	6.45e-06
ENSG00000218350.1	LYPLA1P3	pseudogene	0.515357	0.00136155	0.0241903	0.787857	7.96e-05	0.00182702	0.720357	2.6e-05	0.000352722
ENSG00000152749.7	GPR180	coding_mRNA	0.515	0.000550189	0.0121429	0.665	0.000203732	0.00393486	1.12	1.89e-07	4.84e-06
ENSG00000157617.12	C2CD2	coding_mRNA	0.514286	0.00257867	0.0389494	1.32929	1.53e-08	1.48e-06	1.54179	2.25e-09	1.01e-07
ENSG00000052795.8	FNIP2	coding_mRNA	0.511786	0.00286819	0.0421733	0.911786	1.19e-05	0.000382349	0.701786	0.000212166	0.00216395
ENSG00000122008.11	POLK	coding_mRNA	0.511786	7.52e-05	0.00253431	1.00679	1.12e-08	1.13e-06	2.86429	1.04e-17	2.31e-14
ENSG00000159063.8	ALG8	coding_mRNA	0.511071	0.00177835	0.0295888	0.716071	7.96e-05	0.00182702	0.678571	0.000117883	0.00130129
ENSG00000166402.4	TUB	coding_mRNA	0.510714	0.00249763	0.0380885	0.815714	6.79e-05	0.001603	1.23071	1.23e-07	3.28e-06
ENSG00000160752.10	FDPS	coding_mRNA	0.51	0.0032549	0.0462578	1.5225	3.54e-08	3.02e-06	2.48	3.08e-13	5.2e-11
ENSG00000151365.2	THRSP	coding_mRNA	0.509286	2.86e-05	0.00116091	1.21179	6.13e-11	1.96e-08	1.57179	1.12e-13	2.29e-11
ENSG00000176871.4	WSB2	coding_mRNA	0.5075	0.00178977	0.0297341	0.7275	3.11e-05	0.000850967	1.05	1.17e-07	3.14e-06
ENSG00000131471.2	AOC3	coding_mRNA	0.506786	7.71e-05	0.00258614	0.486786	0.000323737	0.00573044	1.05429	1.9e-09	8.69e-08
ENSG00000140374.11	ETFA	coding_mRNA	0.506429	8.09e-05	0.00267696	1.23393	7.1e-10	1.27e-07	1.15393	3.45e-10	1.98e-08
ENSG00000149809.10	TM7SF2	coding_mRNA	0.505357	0.000190932	0.00535899	0.802857	1.14e-06	5.36e-05	2.01536	1.4e-13	2.72e-11
ENSG00000137145.16	DENND4C	coding_mRNA	0.505	0.00189206	0.0310764	0.4975	0.00391212	0.041131	0.875	3.32e-06	5.98e-05
ENSG00000198252.7	STYX	coding_mRNA	0.503214	0.000509143	0.0114963	1.21821	1.51e-08	1.47e-06	1.06071	7.78e-09	2.99e-07
ENSG00000166912.12	MTMR10	coding_mRNA	0.500714	0.000812377	0.0164253	1.35571	2.72e-09	3.63e-07	1.19821	2.22e-08	7.27e-07
ENSG00000169418.9	NPR1	coding_mRNA	0.500357	0.00298234	0.0433157	1.06536	4.47e-07	2.45e-05	1.65036	3.13e-10	1.82e-08
ENSG00000198648.6	STK39	coding_mRNA	0.5	0.00160215	0.027271	0.84	3.37e-06	0.000134312	1.035	7.68e-08	2.18e-06
ENSG00000005700.10	IBTK	coding_mRNA	0.495714	5.34e-05	0.0019298	0.628214	5.9e-06	0.00021359	0.765714	1.05e-07	2.85e-06
ENSG00000023228.9	NDUFS1	coding_mRNA	0.488571	0.0012474	0.0227959	0.496071	0.00277437	0.0315108	1.39857	6.94e-10	3.61e-08
ENSG00000152818.14	UTRN	coding_mRNA	0.486429	0.000574726	0.0125594	1.00143	3.42e-07	1.97e-05	1.17393	2.86e-09	1.25e-07
ENSG00000077254.10	USP33	coding_mRNA	0.480357	0.000729588	0.0150815	0.442857	0.00156918	0.0203951	0.765357	1.34e-06	2.69e-05
ENSG00000213839.4	RP11-3J10.4	pseudogene	0.473214	0.0022354	0.0354045	0.495714	0.00260187	0.0300375	0.688214	6.33e-05	0.000762415
ENSG00000119729.6	RHOQ	coding_mRNA	0.472143	0.000205231	0.00565066	0.637143	1.69e-05	0.00051358	0.762143	4.96e-07	1.12e-05
ENSG00000137275.9	RIPK1	coding_mRNA	0.471786	0.00356289	0.0495903	0.594286	0.00160356	0.0207124	0.876786	1.18e-05	0.0001787
ENSG00000101182.10	PSMA7	coding_mRNA	0.468929	0.000648719	0.0138239	0.701429	1.15e-05	0.000371834	1.19893	1.06e-09	5.23e-08
ENSG00000124198.8	ARFGEF2	coding_mRNA	0.4675	0.00182742	0.0302238	0.5725	0.000211574	0.00405355	0.635	5.5e-05	0.000675549
ENSG00000186205.8	MARCH1	coding_mRNA	0.4675	0.00121456	0.0223268	1.0375	2.99e-07	1.77e-05	0.765	5.09e-06	8.6e-05
ENSG00000122696.8	SLC25A51	coding_mRNA	0.466071	0.000806077	0.0163277	0.563571	0.000235121	0.00442816	0.671071	6.12e-06	0.000100713
ENSG00000143653.9	SCCPDH	coding_mRNA	0.466071	0.00226599	0.0356846	0.756071	1.7e-05	0.000516133	0.778571	4.24e-06	7.33e-05
ENSG00000187288.6	CIDEC	coding_mRNA	0.465714	0.000391441	0.0093597	0.965714	4.48e-08	3.67e-06	1.06071	1.44e-09	6.82e-08
ENSG00000119471.10	HSDL2	coding_mRNA	0.463571	0.00143053	0.0251212	0.696071	5.71e-05	0.0013925	1.12107	1.53e-08	5.34e-07
ENSG00000054219.9	LY75	coding_mRNA	0.463214	0.0010169	0.0194491	0.770714	7.75e-06	0.000268196	0.770714	2.3e-06	4.34e-05
ENSG00000261053.1	CTD-2144E22.2	pseudogene	0.455	0.00249321	0.0380704	1.4075	1.46e-09	2.2e-07	0.3875	0.00645266	0.0381276
ENSG00000123983.9	ACSL3	coding_mRNA	0.451786	0.000610286	0.0131465	0.734286	6.31e-05	0.00151631	1.29179	2.74e-10	1.63e-08
ENSG00000111666.6	CHPT1	coding_mRNA	0.451071	0.0020063	0.032456	0.596071	0.000442446	0.00738001	1.61607	4.37e-11	3.49e-09
ENSG00000173482.12	PTPRM	coding_mRNA	0.450714	0.000840774	0.0168675	0.658214	2.7e-05	0.000761079	0.983214	4.54e-08	1.38e-06
ENSG00000115828.11	QPCT	coding_mRNA	0.445357	0.000905246	0.0178791	1.15786	5.66e-09	6.36e-07	1.35786	6.89e-11	5.12e-09
ENSG00000177119.11	ANO6	coding_mRNA	0.443571	0.000269798	0.00699415	0.381071	0.00155936	0.0202957	0.798571	7.57e-08	2.15e-06
ENSG00000187498.10	COL4A1	coding_mRNA	0.442143	0.00279393	0.0413556	0.682143	4.71e-05	0.00118685	1.00214	1.01e-07	2.75e-06
ENSG00000122729.14	ACO1	coding_mRNA	0.439643	0.000710656	0.0148191	0.659643	2.63e-05	0.000747579	2.19964	5.1e-15	1.97e-12
ENSG00000110435.7	PDHX	coding_mRNA	0.438929	0.00245241	0.0376928	1.79643	3.3e-11	1.21e-08	1.01893	1.95e-07	4.96e-06
ENSG00000076555.11	ACACB	coding_mRNA	0.434286	0.000109196	0.00341341	0.799286	5.12e-08	4.07e-06	1.37179	3.33e-13	5.46e-11
ENSG00000147853.12	AK3	coding_mRNA	0.433571	0.00221271	0.0351623	0.706071	5.28e-05	0.00130701	1.33857	5.56e-10	2.97e-08
ENSG00000091542.8	ALKBH5	coding_mRNA	0.433571	0.00378178	0.0519959	0.838571	1.39e-05	0.000435403	1.18107	3.02e-08	9.53e-07
ENSG00000147400.8	CETN2	coding_mRNA	0.431786	0.000882918	0.0175319	1.03179	2.31e-08	2.09e-06	1.05929	2.28e-09	1.02e-07
ENSG00000226549.3	SCDP1	pseudogene	0.431071	0.000712007	0.0148329	0.521071	9.69e-05	0.00214618	0.771071	1.76e-07	4.54e-06
ENSG00000107957.12	SH3PXD2A	coding_mRNA	0.430714	0.000944735	0.0184617	0.763214	3.31e-06	0.000132901	1.49821	1.8e-11	1.6e-09
ENSG00000170485.12	NPAS2	coding_mRNA	0.429286	0.00350074	0.0489221	1.60929	5.52e-11	1.78e-08	0.921786	5.33e-07	1.19e-05
ENSG00000107798.13	LIPA	coding_mRNA	0.428214	0.0026783	0.0399963	0.673214	0.000114048	0.00245198	1.25321	1.35e-09	6.48e-08
ENSG00000124782.15	RREB1	coding_mRNA	0.426786	0.00355016	0.0494465	0.449286	0.00355296	0.0380997	0.859286	2.37e-06	4.45e-05
ENSG00000173692.8	PSMD1	coding_mRNA	0.423929	0.000825762	0.0166757	0.428929	0.00162361	0.0208902	1.61393	8.95e-13	1.26e-10
ENSG00000186312.6	CA5BP1	pseudogene	0.423929	0.00257266	0.0388939	1.48143	1.59e-10	4.07e-08	1.39643	1.65e-10	1.08e-08
ENSG00000172939.4	OXSR1	coding_mRNA	0.415714	0.00118198	0.0218526	0.625714	2.79e-05	0.000781195	0.390714	0.00198174	0.0146701
ENSG00000134243.7	SORT1	coding_mRNA	0.415714	0.0012632	0.023034	0.935714	4.9e-07	2.64e-05	0.815714	3.52e-07	8.25e-06
ENSG00000198721.8	ECI2	coding_mRNA	0.412857	0.00324243	0.0461657	0.490357	0.00162243	0.0208902	0.710357	1.43e-05	0.00020966
ENSG00000121691.4	CAT	coding_mRNA	0.4025	0.00175511	0.02929	0.6225	0.000105269	0.00229741	1.0725	3.57e-09	1.52e-07
ENSG00000148848.10	ADAM12	coding_mRNA	0.387143	0.000449034	0.0104294	0.564643	1.01e-05	0.000334764	2.92714	3.47e-19	1.3e-15
ENSG00000148730.6	EIF4EBP2	coding_mRNA	0.375357	0.000602174	0.0130308	0.692857	6.06e-07	3.15e-05	0.855357	2.94e-09	1.28e-07
ENSG00000127884.4	ECHS1	coding_mRNA	0.375357	0.00253178	0.0384331	1.15286	5.28e-09	6.06e-07	1.82036	9.61e-14	2e-11
ENSG00000151726.9	ACSL1	coding_mRNA	0.350714	0.000438261	0.0102397	0.358214	0.000904109	0.0132353	1.03321	7.55e-11	5.57e-09

## Sheet: Supplementary Table 6
Supplementary Table 6. Proteins independently dysregulated by each ADIPINT targeting GapmeR independently
geneName	logFC.GapmeR 1	P.Value.GapmeR 1	FDR.GapmeR 1	logFC.GapmeR 2	P.Value.GapmeR 2	FDR.GapmeR 2	logFC.GapmeR 3	P.Value.GapmeR 3	FDR.GapmeR 3
ACLY	-0.916428	5.62688e-09	1.0089e-05	-1.18713	3.86435e-10	6.92877e-07	-1.22069	2.71911e-11	4.87537e-08
HSD17B12	-0.791402	0.000159251	0.014339	-1.49985	1.06979e-07	2.95099e-05	-1.10459	2.17339e-06	0.000114408
LPL	-0.586958	1.28681e-07	9.59141e-05	-0.380937	0.000215259	0.0047357	-0.704422	5.78896e-09	2.35929e-06
SCD	-0.487272	0.000483368	0.0238311	-0.803951	4.41717e-06	0.000494999	-1.27545	3.24357e-10	2.32629e-07
ECHDC1	-0.480972	0.0023568	0.045195	-0.616712	0.000694779	0.00983191	-0.673994	8.18458e-05	0.00169653
PRXL2A	-0.478959	0.000920693	0.0305597	-0.903741	1.66841e-06	0.000213675	-0.945723	1.46529e-07	2.10181e-05
FASN	-0.44507	9.91366e-05	0.0111139	-0.568312	1.94116e-05	0.0014502	-0.512911	1.72638e-05	0.000547857
ACSS2	-0.438934	0.000660324	0.0265301	-0.640779	3.43376e-05	0.00183783	-0.609951	1.54447e-05	0.000498961
ACSL1	-0.42663	0.000177909	0.0144996	-0.498321	0.00010877	0.0031204	-0.735264	9.60798e-08	1.5661e-05
ALDOA	-0.422591	0.00525869	0.0757336	-0.92306	4.24807e-06	0.000491406	-0.652596	8.84741e-05	0.00180266
PDHB	-0.404314	6.14406e-06	0.00129603	-0.175715	0.0319574	0.0983176	-0.36727	2.2196e-05	0.000686163
DECR1	-0.402788	5.94917e-06	0.00129603	-0.323482	0.000331383	0.00660759	-0.500678	2.30452e-07	2.75467e-05
ACSL5	-0.376463	0.000948631	0.0305597	-0.3291	0.00689016	0.0350968	-0.618601	2.58423e-06	0.000114408
ETFA	-0.363839	0.00152382	0.0350491	-0.255151	0.0334767	0.101306	-0.278574	0.0111892	0.0616354
DLAT	-0.36025	7.99914e-06	0.00142936	-0.296772	0.000318059	0.00648046	-0.442115	3.961e-07	3.64209e-05
GPD1	-0.356128	0.000641328	0.0265301	-0.475001	9.82241e-05	0.00288714	-0.444677	5.73018e-05	0.00125295
HADH	-0.348456	0.00213807	0.0428331	-0.327413	0.00790288	0.0386627	-0.470775	0.000109137	0.00202891
ETFB	-0.337963	0.000109141	0.01186	-0.484376	4.55529e-06	0.000495009	-0.241688	0.00283304	0.0212983
PDHA1	-0.332253	0.00153293	0.0350491	-0.387171	0.00105872	0.0115749	-0.346235	0.00106044	0.0110867
CS	-0.325969	0.000857628	0.0301515	-0.347563	0.00132311	0.0134916	-0.531998	2.43848e-06	0.000114408
APMAP	-0.304677	0.000418527	0.0214405	-0.200291	0.0232868	0.0797577	-0.296878	0.000542635	0.00635911
ACACB	-0.294389	0.00867334	0.0959957	-0.269153	0.0278207	0.0892354	-0.419436	0.000464686	0.00555455
ACADVL	-0.284713	0.00801853	0.0914093	-0.347077	0.00434149	0.0268424	-0.52222	2.25171e-05	0.000690139
LETM1	-0.274987	0.0042749	0.0649568	-0.320362	0.00311397	0.0220685	-0.417027	7.87319e-05	0.00166078
SAR1A	-0.272281	0.00113548	0.0342282	-0.25169	0.00533426	0.0308404	-0.313982	0.000280511	0.00376747
DLST	-0.268322	0.00146839	0.0350491	-0.275938	0.00295489	0.021893	-0.196062	0.0144994	0.0720151
ALDH1A1	-0.26533	0.00811341	0.0914093	-0.311439	0.00579755	0.0323818	-0.223548	0.0226331	0.100334
ALDH1A2	-0.26533	0.00811341	0.0914093	-0.311439	0.00579755	0.0323818	-0.223548	0.0226331	0.100334
ILF3	0.234071	0.00636888	0.082154	0.239994	0.0113046	0.0487826	0.208751	0.0134187	0.0678694
COL1A1	0.279246	0.00895144	0.0978654	0.468576	0.000285783	0.0059238	1.08025	1.65564e-10	1.48428e-07
ARHGDIA	0.343147	0.003226	0.0530662	0.522071	0.000178176	0.00436232	0.387617	0.00115241	0.0117069
PKLR	0.356544	0.004897	0.0731694	0.387952	0.00595625	0.0325577	0.598364	2.85541e-05	0.000839305
RBMXL2	0.360699	0.00138626	0.0342838	0.488799	0.000208828	0.00462256	0.262234	0.0143728	0.0715215
FKBP1A	0.374147	0.00275729	0.0475295	0.429979	0.00220186	0.0182876	0.655717	5.95644e-06	0.000222498
FKBP10	0.376307	0.000499413	0.0238311	0.619291	4.79374e-06	0.000505599	0.347325	0.0010736	0.0111694
COL3A1	0.392166	0.000954458	0.0305597	0.478299	0.000409886	0.00724065	0.755975	2.2944e-07	2.75467e-05
UBA1	0.395524	0.000286481	0.018345	0.239186	0.0295864	0.0932309	0.392182	0.000313161	0.00412866
MARCKS	0.422744	0.00634718	0.082154	0.867126	1.43957e-05	0.00117325	0.784123	1.24482e-05	0.000447634

## Sheet: Supplementary Table 7
Supplementary Table 7. Significant GO 'cellular component' terms enriched by the 38 differentially expressed proteins
ID	Name	p-value	FDR B&H	Genes from Input	Genes in Annotation
GO:0005759	mitochondrial matrix	6.454e-10	8.133e-08	11	478
GO:1990204	oxidoreductase complex	1.642e-09	1.034e-07	7	116
GO:0043209	myelin sheath	0.0006356	0.02669	4	214

## Sheet: Supplementary Table 8
Supplementary Table 8. Significant GO 'biological processes' terms enriched by the 38 differentially expressed proteins
ID	Name	p-value	FDR B&H	Genes from Input	Genes in Annotation
GO:0032787	monocarboxylic acid metabolic process	6.691e-23	5.868e-20	22	696
GO:0006637	acyl-CoA metabolic process	1.286e-20	3.457e-18	13	113
GO:0035383	thioester metabolic process	1.286e-20	3.457e-18	13	113
GO:0035384	thioester biosynthetic process	1.971e-20	3.457e-18	11	54
GO:0071616	acyl-CoA biosynthetic process	1.971e-20	3.457e-18	11	54
GO:0034033	purine nucleoside bisphosphate biosynthetic process	3.103e-19	3.401e-17	11	68
GO:0034030	ribonucleoside bisphosphate biosynthetic process	3.103e-19	3.401e-17	11	68
GO:0033866	nucleoside bisphosphate biosynthetic process	3.103e-19	3.401e-17	11	68
GO:0034032	purine nucleoside bisphosphate metabolic process	4.907e-19	3.912e-17	13	148
GO:0033865	nucleoside bisphosphate metabolic process	4.907e-19	3.912e-17	13	148
GO:0033875	ribonucleoside bisphosphate metabolic process	4.907e-19	3.912e-17	13	148
GO:0006084	acetyl-CoA metabolic process	2.847e-17	2.081e-15	9	40
GO:0006631	fatty acid metabolic process	2.678e-16	1.807e-14	15	404
GO:0009150	purine ribonucleotide metabolic process	1.336e-15	8.37e-14	16	561
GO:0006732	coenzyme metabolic process	1.718e-15	1.005e-13	13	275
GO:0009259	ribonucleotide metabolic process	2.017e-15	1.106e-13	16	576
GO:0006163	purine nucleotide metabolic process	2.247e-15	1.141e-13	16	580
GO:0009108	coenzyme biosynthetic process	2.342e-15	1.141e-13	11	148
GO:0019693	ribose phosphate metabolic process	2.569e-15	1.186e-13	16	585
GO:0072521	purine-containing compound metabolic process	5.458e-15	2.393e-13	16	614
GO:0009152	purine ribonucleotide biosynthetic process	1.218e-14	5.088e-13	13	320
GO:0006164	purine nucleotide biosynthetic process	1.547e-14	6.168e-13	13	326
GO:0009260	ribonucleotide biosynthetic process	2.033e-14	7.753e-13	13	333
GO:0072522	purine-containing compound biosynthetic process	2.462e-14	8.972e-13	13	338
GO:0046390	ribose phosphate biosynthetic process	2.558e-14	8.972e-13	13	339
GO:0009117	nucleotide metabolic process	3.641e-14	1.228e-12	16	694
GO:0044272	sulfur compound biosynthetic process	4.498e-14	1.461e-12	11	193
GO:0006790	sulfur compound metabolic process	1.694e-13	5.306e-12	13	393
GO:0009165	nucleotide biosynthetic process	4.317e-13	1.306e-11	13	423
GO:1901293	nucleoside phosphate biosynthetic process	4.722e-13	1.381e-11	13	426
GO:0051188	cofactor biosynthetic process	4.943e-13	1.398e-11	11	240
GO:0006635	fatty acid beta-oxidation	1.254e-12	3.436e-11	8	76
GO:0051186	cofactor metabolic process	3.227e-12	8.576e-11	13	496
GO:0019395	fatty acid oxidation	1.927e-11	4.971e-10	8	106
GO:0034440	lipid oxidation	2.243e-11	5.57e-10	8	108
GO:0006091	generation of precursor metabolites and energy	2.287e-11	5.57e-10	13	580
GO:0072330	monocarboxylic acid biosynthetic process	2.521e-11	5.975e-10	10	250
GO:0046949	fatty-acyl-CoA biosynthetic process	2.602e-11	6.006e-10	6	42
GO:0044282	small molecule catabolic process	2.824e-11	6.35e-10	12	461
GO:0009062	fatty acid catabolic process	3.239e-11	7.103e-10	8	113
GO:0035337	fatty-acyl-CoA metabolic process	1.486e-10	3.179e-09	6	42
GO:0072329	monocarboxylic acid catabolic process	1.533e-10	3.2e-09	8	137
GO:0044242	cellular lipid catabolic process	3.719e-10	7.585e-09	9	232
GO:0006085	acetyl-CoA biosynthetic process	4.672e-10	9.313e-09	5	22
GO:0006633	fatty acid biosynthetic process	9.87e-10	1.923e-08	8	173
GO:0046394	carboxylic acid biosynthetic process	1.219e-09	2.324e-08	10	372
GO:0016053	organic acid biosynthetic process	1.251e-09	2.334e-08	10	373
GO:0016054	organic acid catabolic process	2.012e-09	3.601e-08	9	281
GO:0046395	carboxylic acid catabolic process	2.012e-09	3.601e-08	9	281
GO:0045333	cellular respiration	4.393e-09	7.705e-08	8	209

## Sheet: Supplementary Table 9
Supplementary Table 9. Absolute values from TROOPS mass-spectrometry run from three independent experiments
Experiment 1							Experiment 2						Experiment 3
Gene Symbol	INPUT	ADIPINT Probe Set 1	ADIPINT Probe Set 2	Lac Z Probe Set	ADIPINT Probe Sets w/Rnase		Gene Symbol	ADIPINT Probe Set 1	ADIPINT Probe Set 2	Lac Z Probe Set	ADIPINT Probe Sets w/Rnase		Gene Symbol	INPUT	ADIPINT Probe Set 1	ADIPINT Probe Set 2	Lac Z Probe Set	ADIPINT Probe Sets w/Rnase
ACAA2	8.82845e+06				738097		ACACA	2.93931e+06	1.58827e+06	78610.6	31605.9		AAMP	106395
ACACA	181566	516953	930598				ACACB	763403	523682				AARS	337965
ACACB	1.0798e+06						ACLY	316388					ABCD3	352065
ACADM	1.74563e+06						ACTB	1.42923e+06	1.03829e+06	774824	840211		ACAA1	535942
ACADVL	1.08285e+06						AMY1A; AMY1C; AMY1B	95604.6	83235.4	94676.5	69469		ACAA2	9363564
ACAT1	1.20488e+06						ANXA1	91439.8	134771	137461	112056		ACACA	1.39003e+07	7.33132e+06	8.28791e+06	1.06898e+06	341586
ACLY	9.41092e+06	66454		110115	2.91988e+06		ANXA2	28875.7	42786.8	41897.7	30020.2		ACACB	1.90258e+07	1.01534e+07	9.18761e+06	977925	318783
ACO2	2.13533e+06				469570		ATP5A1	72479.4	52967.6	27496.1	26929.1		ACAD9	174538
ACOT1	456384				63054.9		AZGP1	154904	203791	141833	145854		ACADM	3.19886e+06	77734.5	48317.8		185563
ACOT2	456384				63054.9		C1orf68	662293	1.18499e+06	771693	651534		ACADSB	277501	66155.5
ACP2	3.59212e+06			103407			CAT	93200.5	101907	104918	58452.8		ACADVL	5.81917e+06
ACSL1	2.90497e+07						CDSN	275711	168786	213482	119017		ACAT1	1.93335e+06	69675.2		31741.9
ACSL3	718915						CSDA; YBX3	53580.1	35109.6	27848.7	26781.4		ACLY	3.44002e+07	224661		58302.7	209721
ACSL4	718915						CST4	63508.5	24260.8		108710		ACO2	3.19486e+06
ACSL5	3122745						CTR9	35670.2	211662	155346	481355		ACOX1	183731	61305.2	65404.8	36335.9	152076
ACSL6	690545						DCD	577065	469803	317970	328112		ACP1	116990
ACTA1	157767						DENND5B		1.31323e+06	104608	1.12496e+06		ACP2	1.83087e+06
ACTA2	157767						DSC1	1.33135e+06	1.11672e+06	1.29135e+06	649323		ACSF2	1.37325e+06
ACTB	1.99305e+08	951509	1.10842e+06	4.33015e+06	4.58262e+06		DSG1	1.31678e+06	1.60903e+06	1.47594e+06	927771		ACSL1	6.24665e+07	224591	75040.2	210096	110907
ACTBL2	3.26969e+06						DSP	1.93492e+06	2.7548e+06	2.3848e+06	1.56503e+06		ACSL4	2.71681e+06
ACTC1	157767						EEF1A2	593003	415373	321470	375349		ACSS2	2.60493e+06
ACTG1	1.99305e+08	951509	1.10842e+06	4.33015e+06	4.58262e+06		EIF4A2	20380	522158	137242	327581		ACTBL2	891718
ACTG2	157767						ETFB	92976.4	45324.5				ACTG2	2.70019e+06
ADH1A	6.63447e+06	76295.7	53283.3	150126			FABP5	222186	233365	210068	122428		ACTN4	752869
ADH1B	8.80631e+06	76295.7	53283.3	150126			FGA	177577	30147.5				ACTR1A	83499.5
ADH1C	4.49013e+06	76295.7	53283.3	150126			FGB	769475	114835		34507.3		ADAMTSL4	1.32204e+06	57505	45006.1		96276
ADH5	608830						FGG	1.01814e+06	145867	12904.4			ADD3	120416
AK1	354278			164275			FLNA	367649	140382	68341.5	120552		ADH1B	6.16563e+06	71546.4	28600.4	65601.8	76185.9
AKR1C1	1.48036e+07			909604			FLNB	327605	297399	451178			ADH1C	1.08887e+06
AKR1C2	1.07139e+07			909604			GAPDH	406071	331845	326822	264786		ADH5	2.62523e+06	901336	70765.8
AKR1C3	1.26152e+07						HADHB	124484					ADIPOQ	142427
AKR1C4	1672099						HBA2; HBA1	4.05185e+06	5.51397e+06	3.96854e+06	3.60286e+06		AGK	449939	312863	411347	507090	478483
ALDH18A1	266277						HBB	1.93917e+07	2.08561e+07	1.78839e+07	1.71007e+07		AGPAT2	163534
ALDH1A1	1.08474e+06	343440	50653.8	204816	250660		HBD	200927	191047	165279	168369		AHCYL2	98007.9	60351.9		42662.8	55939.2
ALDH1A2	1.08474e+06	343440	50653.8	204816	250660		HIST1H4A; HIST1H4F; HIST1H4D; HIST1H4J; HIST2H4A; HIST2H4B; HIST1H4H; HIST1H4C; HIST4H4; HIST1H4E; HIST1H4I; HIST1H4B; HIST1H4K; HIST1H4L	569347	528733	500285	1.42206e+06		AHNAK	903902
ALDH1A3	1.08474e+06	343440	50653.8	204816	250660		HORMAD2		168830		120544		AIFM1	1.6502e+06
ALDH1B1	1.34657e+06	343440	50653.8	204816	250660		HSPA1B; HSPA1A	188836	87906				AIFM2	417961		37844.3	192590	65125.3
ALDH2	397026						HSPA8	266081		199862			AIMP2	189006
ALDH7A1	254875						IGHG1	345202	221356	173474	151511		AK1	2.46087e+06	192432	35998.6		185788
ALDH9A1	9.28146e+06						IGKC	178795	144247	111699	138251		AK2	158884
ALDOA	1.38858e+07		69128.8				JUP	745167	933285	874846	617698		AKAP12	1.22489e+06
ALDOB	1.90165e+06						KPRP	829355	2.34648e+06	1.20308e+06	840836		AKAP2; PALM2-AKAP2	95722.8
ALDOC	1.90165e+06						KRT1	3.95453e+08	6.72627e+08	5.21193e+08	3.0958e+08		AKR1B1	427596
ANP32A	2.29173e+07						KRT2	1.04412e+08	1.46804e+08	1.84924e+08	9.53392e+07		AKR1C1	5.33119e+06			81612.2	120398
ANP32B	2.40553e+07		278409	416413			KRT6B	1.41995e+07	1.84906e+07	2.21617e+07	9.42574e+06		AKR1C2	1.3292e+07	424494	114411	396730	279808
ANP32C	9.81908e+06						KRT81		29362.5		1086103		ALDH1A1	3.32527e+06	92438.3
ANP32D	1.50846e+06						KRTAP3-2	214885	99412.1	99082.7	395710		ALDH1L1	259278
ANP32E	444076						LTF	289648	246484	221626	202910		ALDH3A2	267640		35393.1	116012	46139.2
ANPEP	2.36437e+07			376270			LYZ	528405	407637	472575	419586		ALDH7A1	2.24019e+06
ANXA1	611170						MCCC1	277262	68176.2				ALDH9A1	6.72893e+06	63806.9	55701
ANXA2	2.38215e+07	1.7816e+06	735997	3.3017e+06	1.10294e+06		NCL	70887.5	29930.2				ALDOA	1.77105e+07	881230		371857	245712
ANXA2P2	2.07764e+07	1.51734e+06	631278	3.08728e+06	866387		PC	5.47162e+06	3.64974e+06	83951.8	161322		ALPL	210838
ANXA5	1.85863e+06		101813		131056		PCCA	1.95816e+06	1.27646e+06	22387.3	18064.2		ALYREF	387016
ANXA6	2.27513e+06						PIP	132196	204879	192942	199402		ANO6	163812
AOC3	2.58e+07						PKM	79722.2	80311.3	66236.6	42785.2		ANP32A	2.49426e+07		42991.8	10861.4	55247.4
AP3B1	3.37673e+06	318448	92874.8	1.05735e+06			PKP1	49421.9	76032.4	73019.9	61777.8		ANP32B	2.03318e+06
APMAP	306262						PRDX1	435497	458500	390734	251274		ANP32E	405199
APOE	2.68573e+06						PRH2; PRH1		433252				ANPEP	6.68843e+06	12630.1	37417.9
ARF4	1.7879e+06						PRSS3	2.36774e+06	2.16809e+06	1905906	2.19155e+06		ANXA1	3.08726e+06	280905	193218	83244.4	141055
ARG1		647553	193695	458525	395880		RAI14	1.07981e+06	1.57994e+06	1.00154e+06	1.06667e+06		ANXA2	2.97349e+07	3.28156e+06	1.91336e+06	485526	5.52906e+06
ARHGEF10	2.61499e+06						RPL13	61729.9	29130.4	28074.6	41646.4		ANXA4	184548
ASAH1	2.63249e+06	95601.8	90551.8	288557			RPS2	34374.9	86823.5	35415.2	184765		ANXA5	6.03523e+06			14248.3
ASNA1	308660						S100A8	432447	417524	356576	390181		ANXA6	1.28751e+07	218255	185389
ASPH	408693						S100A9	127575	247722	140795	311439		AOC3	1.14242e+07	29154.1
ASS1	1.47402e+06						SERPINB12	663999	763366	689424	530469		AP2A1	580501
ATP5A1	1.19438e+07		38157.7				SRSF11	177409	53740.9	75281.1	281005		AP2B1	287209
ATP5B	1.25276e+06	81354.1		1.26279e+06			TGM3	88374.8	62463.8	47687.8	51646.6		AP3B1	3.87896e+06
ATP5O	315804				172124		TUBA1A	171933	120822	89262.2	139155		APEH	204481	168221	122902	86404.9	297703
ATP6AP1	7.88173e+06	2.39839e+06	45453.4		4461163		UBA52	145955	109485	79845.8	93149.3		APOE	4.12939e+06
AZGP1	346807	509936	263459	351917	774662		YWHAZ	108920	103595	81632.7	111606		APRT	695407
BSG	5.77999e+07	148512		826334	304770		ZG16B	149428	171992	139813	159501		ARCN1	932113
C1orf68	559765	1.3716e+06	1.12733e+06	2.28501e+06	1.1538e+06		*Input sample from experiment 2 was lost in proceessing for mass-spectrometry						ARF5	227739
C1QBP	604548												ARG1	192431	126747	180526
CACNA2D1	2.23821e+06												ARHGAP1	295925
CACNA2D2	499113												ARHGDIA	513503
CANX	697403												ARHGEF2	127953
CCDC80	205582												ARL8A	214550
CCT8	6928147	821747	1.09183e+06	1.27401e+06	291032								ARPC2	702196
CD109	396755												ARPC4	304421			75142.5
CD248	1.23246e+07												ARPC5	384878
CD276	940887			340999									ASAH1	4.24077e+06	180734	283368	333262	261367
CD36	4.33173e+08	252579	169819		93112.1								ASPH	708742
CD44	2.69809e+07		107541										ASS1	3.05198e+06
CD47	4.72714e+06												ATAD3C	445602
CD59	2.51371e+06												ATP2A2	3.26607e+06	79220.5	79409.5	142923	161602
CD63	6.34204e+06	248495	56284.2	325835									ATP2B4	730529			24181.6
CD99L2	1.67099e+06				186418								ATP5A1	1.36616e+07	727968	531863	527746	550247
CFL1	732795												ATP5B	2.68648e+06	217311	170796	196540	202190
CFL2	732795												ATP5D	247374
CKAP4	545207												ATP5J2-PTCD1	288121
CLTC	2.10459e+06	225493		428270									ATP5O	815200
CLTCL1	1.4458e+06	225493		428270									ATP6AP1	1.72607e+06
CLU	504831	1261476	388371	327138	191328								ATRX	147312
CNTFR	1.28611e+06												AZGP1		130218		58148.2	144010
COL6A1	4.62685e+06												B4GALT1	72376.4
COL6A2	4491363		199370	196284									BCAP31	3.45356e+06
COL6A3	2.12571e+07	23472.7	232128	615013	297790								BCLAF1	751378	170011	154786
COPB2	635837	95297.2											BLMH	182548	236220	303884	160192	379869
CPM	557463												BLVRB	237244
CPNE2	292598												BPHL	581138
CPNE3	292598												BSG	4.10464e+06	466946	44361.1		505129
CPNE4	292598												C17orf112	263857
CPNE5	292598												C1orf68	566518	251445	161067	328894	668522
CPNE6	292598												CACNA2D1	199048
CPNE7	292598												CACYBP	511288
CPNE8	292598												CALR	2811268
CPNE9	292598												CAMK2D	246447
CS	3.91248e+06												CANX	252236
CSDA; YBX3	1.58694e+06	253817		544685	310657								CAP1	162711
CSDE1	625218		103434	476616	703588								CAPZB	1.70261e+06
CSPG4	4.70167e+06												CASP14	251285	226516	282325	121615	333624
CTCFL	2.35781e+06												CAST	281654
CTR9	482556												CAT	720914
CTSB	2.39323e+06												CCDC80	596208
CTSC	805390												CCT2	710530
CTSD	411839	82450.5		344535	120809								CCT3	332422
CYB5R3	1.72369e+06												CCT8	1.98867e+06
DAG1	1.87259e+06												CD248	5957326
DCD	1.04695e+06	1.05342e+06	1.6129e+06	2.69495e+06	4.49581e+06								CD276	996198	110141			69354.2
DDX17	705191		210080	164515	320330								CD36	2.85166e+08	583647	260409	262382	442041
DDX3X	1.11071e+06												CD44	1.457e+07			30214.6
DDX3Y	1.11071e+06												CD58	906802			211710
DDX4	548630												CD59	4.90597e+06
DDX46	505346												CD63	1.29461e+07	228082
DDX5	474135		210080	164515									CD68	1.6783e+06
DECR1	5.31281e+06												CDC42	505474
DES	1.36924e+07												CDSN		159945	247925	69819.8	145539
DHX9	175657												CFD	410445
DLAT	1.92003e+06												CFL1	539667	105107		30548.1	36297.1
DLD	3.99247e+06												CHCHD3	293775		10245.7
DOCK10	80153.7	651441	341517	1.39839e+06	925532								CHRDL1	101308
DPP4	5.51786e+06	122811	264621										CKAP4	541318
DSC1		355132	103015	241394	173906								CLCN5	182335
DSG1	167772	4.81935e+06	1.81648e+06	3.43681e+06	2.86042e+06								CLIC1	816471
DSP	902744	6.48923e+06	1.40558e+06	4.30584e+06	4.53635e+06								CLMN	93259.4
DYNC1H1	742646												CLN5	352628
ECHS1	990709												CLTC	1.15915e+07	166560		63722.7	313783
EEF1A1	9.11347e+07	1.35944e+06	727422	738109	903311								CLU	594573	1.0428e+06			381288
EEF1A1P5	9.11347e+07	1.35944e+06	727422	738109	903311								CMBL	273220
EEF1A2	6.57522e+07	1.24604e+06	428744	738109	808446								CNBP	1.019e+06
EEF1G	605476												COL12A1	310862
EEF2	5.51442e+06	56219.5	62922		35460.1								COL15A1	2.35831e+06	179149	193415	161396	171430
EFR3B		90001.9	86147.1	282350									COL18A1	182980
EGFR	774504												COL1A1	1.18198e+06
EHD2	1.46037e+06		90619										COL1A2	175160	32766.7	50396.5
EIF3C	784333												COL4A1	428111
EIF3CL	784333												COL4A2	2.88461e+06		584604	417638
EIF4A1	3.00889e+06												COL6A1	1.85026e+06			78715
EIF4A2	2106619												COL6A2	735109
EIF4B	796811			229227									COL6A3	2.05015e+07	87763.2	60720.7	152780	92290
EIF5A	504182												COLEC12	106941	248008
EIF5AL1	504182												COMT	321478
EIF5B	1.63425e+06	144151		338540	216067								COPA	428492
ELAVL1	9.53148e+06	1.03755e+06	504481	1.59792e+06	300064								COPB1	178368
ELAVL2	3.04829e+06	373262	156219										COPB2	74353.9
ELAVL4	3.04829e+06	373262	156219										CORO1B	253048
EMILIN1	5.79466e+07	255291	111990	534360									COTL1	233253
EMP3	757542												CPD	993013
ENO1	7.10186e+06	1.34409e+06	269581	886022	180662								CPM	840367
ENO2	933866												CRAT	499901
ENO3	933866												CS	1.09143e+07	250735		81141.3	267340
EPHX1	1.34967e+06												CSDE1	1.53653e+06
ETFA	1.69331e+06												CSPG4	759108
ETFB	5.10525e+06		308445	1.88161e+06	787261								CSRP1	626149
FABP4	4.82352e+08	2.96441e+06	1.27403e+06	2.18304e+06	2.319e+06								CST4				823087
FABP5	7.88539e+07	4.19683e+06		669267	606302								CSTB	602876
FABP5P3	6.28352e+06	672980											CTR9	458416				53546.1
FAM120A	449860												CTSB	3.3919e+06			335461	73707.4
FASN	7.45938e+07	2.7e+06	2.92391e+06	5.42633e+06	4.39316e+06								CTTN	3.63617e+06
FBN1	1.99868e+08	2.38392e+06	950803	3.00176e+06	987403								CYB5A	757108
FBN2	6.73177e+06				67283.5								CYB5R3	4301884
FDXR	370112		291549										DAG1	933722
FHL1	5.52353e+06			916842									DARS	772007	412371	388477
FKBP10	849772												DBNL	162611
FLNA	1.60947e+06		124686	166151									DCAF8	119196
FLNB	881876												DCD	468824	682861	483589	799820	938961
FLNC	548398		242595	2.04167e+06	665346								DCN	560519
FN1	5.01651e+06		100113										DCTN1	283111	52219.5	47523.9
FSCN1	3.69051e+06		118891										DDX1	1.07262e+06		32693.3
FUBP3	2.4321e+06	55016.5											DDX17	1.52723e+06	126971
FUS	439739												DDX21	90111.9
G6PD	1.94378e+06												DDX23	691019
GAPDH	4.29791e+07	1.52151e+06	379983	1.14184e+06	718862								DDX3X	3.86209e+06	23271.8
GBE1	1.13608e+06												DDX46	620349
GFPT1	400937												DECR1	6.71756e+06	44526.3	39270.7	69494.4
GLUD1	806136												DEK	468820	38411.2			177713
GLUD2	806136												DHCR24	137370	130586			135808
GNA12	1.73454e+06												DHCR7	566840
GNA13	1.73454e+06												DHX9	1.95638e+06
GNAS	727561												DIP2C	228459		10316.5
GNS	2.88869e+07		436539		632659								DLD	1.38862e+07	62877.6	51975.3	134140
GPC1	614867												DNAJA2	531483		85370.6	52941.5
GPC4	8.07192e+06												DPH2	305755	389106	236751	154909	213239
GPD1	2.43195e+07	313367	179685	533141									DPP4	4.27621e+06	292082	117608	536762	392270
GPNMB	3.36022e+07												DPYSL2	5.0656e+06	2.14838e+06	691840		1.54611e+06
GSTM2	1.3316e+06												DSC1		899143	1.37592e+06	721238	945134
GSTM3	1.3316e+06												DSG1	147750	667515	890908	449918	1.12094e+06
GSTM5	1.3316e+06												DSP	225382	678762	800428	505512	774573
H2BFS; LOC102724334	1.61099e+06		166433		490102								DYNC1H1	7.59715e+06	1.67639e+06	1.24845e+06	474427	765318
H3F3A; H3F3AP4; H3F3B	430487			90078.9	195532								DYNLT3	365918	1.87858e+06	588499
H3F3C	430487			90078.9	195532								ECD		531950	251644		1.13311e+06
HADH	26650785	251804	186793	497875	102525								ECH1	5322904	242579		68224.3
HADHA	1.39564e+07	605488	247064	949760	221621								ECHDC1	1.81511e+06		158224
HADHB	8.99143e+06												ECHS1	441368	86304.6	22551.2	148455	199837
HDLBP	593452												EEF1A1	7.93827e+07	3.05436e+06	1.36623e+06	787616	680570
HIST1H2BA	1.61099e+06		166433		490102								EEF1G	1.66119e+06	972410	990324
HIST1H2BB	1.61099e+06		166433		490102								EEF2	1.21888e+07			744712	285805
HIST1H2BD	1.61099e+06		166433		490102								EGFR	936768
HIST1H2BH	1.61099e+06		166433		490102								EHD2	4.90221e+06	59367.2	31340.7		36698.9
HIST1H2BI; HIST1H2BD; HIST1H2BC; HIST1H2BF; HIST1H2BG; HIST1H2BE	1.61099e+06		166433		490102								EHD3	277294
HIST1H2BJ	1.61099e+06		166433		490102								EIF2S1	262438	1376074			924687
HIST1H2BK	1.61099e+06		166433		490102								EIF3C	1.96361e+06
HIST1H2BL	1.61099e+06		166433		490102								EIF4A1	838024	34357.1
HIST1H2BM	1.61099e+06		166433		490102								EIF4B	297912
HIST1H2BN	1.61099e+06		166433		490102								EIF5A	226107				363394
HIST1H2BO	1.61099e+06		166433		490102								EIF5B	3.44481e+06
HIST1H3F; HIST1H3C; HIST1H3D; HIST1H3G; HIST1H3H; HIST1H3B; HIST1H3A; HIST1H3E; HIST1H3I; HIST1H3J	430487			90078.9	195532								EIF6	1023876
HIST1H4A; HIST1H4F; HIST1H4D; HIST1H4J; HIST2H4A; HIST2H4B; HIST1H4H; HIST1H4C; HIST4H4; HIST1H4E; HIST1H4I; HIST1H4B; HIST1H4K; HIST1H4L	362223		34604.9		120233								ELAVL1	9.58391e+06	415055	192751	113834	36061.3
HIST2H2BE	1.61099e+06		166433		490102								ELAVL4	972267
HIST2H2BF	1.61099e+06		166433		490102								EMD	222728
HIST2H3A; HIST2H3C; HIST2H3D	430487			90078.9	195532								EMILIN1	2.85604e+07	2.95528e+06	1.69441e+06	3.6675e+06	1.70954e+06
HIST2H3PS2	430487			90078.9	195532								EMP3	535000
HIST3H2BB	1.61099e+06		166433		490102								ENG	220660
HIST3H3	430487			90078.9	195532								ENO1	1.99714e+07	974942	309721	132265
HMGB1	4499177												ENO3	2.45228e+06
HMGN5	1.69948e+06												EPB41L2	1.01961e+06		163862
HNRNPA1	8.18594e+06	280334	380602										EPB41L3	2.10651e+06
HNRNPA1L2	7.36205e+06	280334	380602										EPHX1	1.79579e+06
HNRNPA2B1	1.19766e+07	318518	165945										EPRS	121820
HNRNPA3	2.76717e+06												ESD	1.25975e+06
HNRNPC	3.70024e+07	1.19243e+06	822930										ESYT1	421470
HNRNPCL1	2.09677e+07	644716	611707										ETFA	5.31594e+06			37725
HNRNPCP5; LOC440563; HNRNPCL2	2.09677e+07	644716	611707										ETFB	5.58814e+06				32290.9
HNRNPD	1.16941e+06												FABP4	2.44912e+09	3.13136e+07	8.54853e+06	2.50088e+06	3.16714e+06
HNRNPDL; HNRPDL	1.71549e+06												FABP5	1.67063e+08	353846	393034	72311.4	272994
HNRNPF	4485329	193784			182466								FAM120A	694213		165473
HNRNPH1	9.80747e+06	654777	922889	299871	314544								FAM213A	887134
HNRNPH2	8.32646e+06	592091	922889										FASN	1.4702e+08	2.27547e+06	5.65619e+06	2.37829e+06	5.26726e+06
HNRNPH3	218897												FBLN2	1.55457e+06
HNRNPK	5.20198e+06	215299	178052	2.29173e+06	423075								FBN1	2.81217e+08	3.69724e+07	3.04176e+07	3.78518e+07	3.59129e+07
HNRNPL	3.62501e+06	370660	558289	689453	126678								FBN2	8913469	729010	544729	898447	805905
HNRNPM	7.432e+06	351162	210321										FER1L5	699132	76753.5	94944.1	80144.2
HNRNPR	557684	46965.3			117636								FERMT2	538899	71447.5		31915.7
HNRNPU	1.61891e+07	196451	342367	1610386	659923								FHL1	1.4592e+07		20925.6
HSD17B4	3.29363e+06												FKBP10	2.91843e+06
HSDL2	444164												FKBP9	1.07036e+06	146594	165813		148284
HSP90AA1	2.96414e+06	690638	845147	2.3617e+06	1.48268e+06								FLNA	1.37586e+07	113391		135086	65202.2
HSP90AA2; HSP90AA2P	1365005	690638	845147	2.3617e+06	866025								FLNC	4.41201e+06	7.89944e+06	4.77676e+06	3.18403e+06	6.98808e+06
HSP90AA5P	628707												FN1	2.28926e+07	734749	764619	715709	1.11372e+06
HSP90AB1	1.80946e+07	108634			138959								FSCN1	4.0543e+06	11901	4173.83		500835
HSP90AB2P	9.85157e+06				138959								FTH1	2.84845e+06
HSP90AB3P	6.06483e+06												FUBP3	410003
HSP90AB4P	4.21266e+06												FUS	723289		569918
HSP90B1	2.29522e+06												G6PD	5.39826e+06		17849.2	14856.9
HSP90B2P	1.01084e+06												GANAB	2.20963e+06
HSPA1B; HSPA1A	1.09178e+06												GAPDH	5.28743e+07	1.06068e+06	628903	465069	604344
HSPA1L	1.09178e+06												GBAS; NIPSNAP2	269140
HSPA2	1.35265e+07	393542	410952	1.07777e+06	289220								GBE1	5.9109e+06	1.04638e+06	1.10308e+06
HSPA5	5.72668e+06			475318									GCN1L1; GCN1	288966
HSPA6	5.18087e+06	129373	77193.4	235775									GDI2	317303
HSPA7	2.50783e+06	129373	77193.4	235775									GFAP	5.1748e+06	6.17621e+06	10832826	4.73517e+06	7.65697e+06
HSPA8	1.92531e+07	426593	451356	1.07777e+06	289220								GFPT1	2.37983e+06	59888.3	75576.5		66831.1
HSPA9	3.70552e+06												GLB1	152510		1.69123e+06		1.24204e+06
HSPB1	3.16345e+06												GLIPR2	921438
HSPB6	1.21745e+06	42915.1											GLP2R	318309	781706	646829	465344	304048
HSPD1	2.29693e+06												GLUD1	2.31163e+06		33651.5
HSPG2	5.17561e+07	294198	417640	1.80313e+06	1.81931e+06								GMEB1	138248
HTRA1	2.45567e+06												GNA12	3.4886e+06	82544.4		43938.6
HYOU1	1.48714e+06												GNA14	583496
IDH1	2.76607e+06	34519	189911		298461								GNAI2	678799
IDH2	1174913												GNB1	7.31064e+06			265111	258300
IGHG1	130135055	242667	1.22781e+06										GNB2L1; RACK1	4.67388e+06				38879.9
IGHG2	3925215												GPAM	188212
IGHG3	130135055	242667	1.22781e+06										GPC1	734844			159761
IGHG4	3925215												GPC4	1.83849e+06
IGKV1-12; IGKV1D-12	554950												GPD1	5.79605e+07	204774		255040	1.47718e+06
IGKV1-39; IGKV1D-39	554950												GPD2	97334.9
IGKV1-6	554950												GPR107	688340
IGKV1D-12	554950												GRPEL1	85135.6
ILF3	316175		209174	517333	491795								GSN	634853
INA	5650880												GSPT1	513674
ITGA1	2.88721e+06												GSR	305921
ITGA6	263739												GSTK1	893714
ITGAV	1.46556e+06	439789	49916.9	461089	405206								GSTM4	366882
ITGB1	1.1327e+08	1.97559e+06	1.45148e+06	2960106									GSTP1	3.74781e+06
JUP	660529	2.97325e+06	447653	1.96041e+06	1.55017e+06								H2AFY	453200
KHSRP	2131723												HADH	2.17519e+07	126529
KPRP	1.56695e+06	5.83773e+06	2.47554e+06	5.55195e+06	3.19614e+06								HADHA	9.59036e+06	2.13701e+07	24696150	2.81153e+06	1.12254e+07
KRT1	4.7118e+08	1.98085e+09	7.35534e+08	2.06901e+09	1.36066e+09								HADHB	4.5343e+06			24331.1
KRT18	80350.4	241338	113154	465931	368098								HAVCR2	110867			70971	130063
KRT2	1.58936e+08	2.34344e+08	1.88031e+08	4.71137e+08	3.85612e+08								HBA2; HBA1	1.69918e+06	1.8934e+06	1.69121e+06	1.87602e+06	1.65211e+06
KRT6B	196758	830867	147548	494563	2201256								HDLBP	1.47297e+06
LAMA4	5.40446e+06	47440	180423	917147	165593								HEPACAM	480174
LAMB1	1.17066e+07	613443	842489	3.68985e+06	303175								HINT2	146124
LAMB2	332966												HIST1H4A; HIST1H4F; HIST1H4D; HIST1H4J; HIST2H4A; HIST2H4B; HIST1H4H; HIST1H4C; HIST4H4; HIST1H4E; HIST1H4I; HIST1H4B; HIST1H4K; HIST1H4L	1.02971e+06	379077	392857	227083	162920
LAMC1	5.36346e+06			609947	358779								HIST2H2BE	1.70892e+06			110084	74168.9
LAMP1	6.27732e+07												HK1	1.05323e+06
LAMP2	4.43884e+07		476307										HK2	1.40998e+06
LDHA	1.34932e+06		281154										HLA-A	632611
LDHB	4.15828e+06	49808.3			186085								HMGB1	7.7858e+06	136848	235131	84937.4	428044
LGALS1	1.17795e+07	75430.4		177285	274759								HMGCS1	442247
LGALS3BP	1.45132e+06	5008466	6.6771e+06	19931016									HMGN5	921285
LIPE	600709												HNRNPA1	1.96154e+06	15383.1
LMNA	31418976	110534	150587	331342	93080								HNRNPA2B1	7.94147e+06
LMNB1	1.53706e+06				330861								HNRNPA3	1.04182e+06
LMNB2	382289												HNRNPC	5.00338e+07	4.0341e+07	3.22367e+07	3.80649e+07	4.08184e+07
LNPEP	3.99783e+06												HNRNPD	3405213	110865	53467.3
LOC101060301; HNRNPCL4	2.09677e+07	644716	611707										HNRNPDL; HNRPDL	1.69431e+06			29926.5
LOC101060301; HNRNPCL4; LOC649330; HNRNPCL3	2.09677e+07	644716	611707										HNRNPF	2.19581e+06	105687	31802.9	48194.8
LPL	8.3899e+06	434531	34406										HNRNPH3	3.91958e+06	81815	53902.8
LRP1	3.04646e+07	68431.3	107543	525305	253303								HNRNPK	3.68369e+06	51274.2			36028.9
LRPPRC	3.86703e+06	73293.6											HNRNPL	681456
LRRC59	333011												HNRNPM	2443394
LTBP2	248381												HNRNPR	7.16494e+06	109112	94488.8
M6PR	4.30216e+06												HNRNPU	9.49735e+06	83516.5	956989	28118.5	79928.1
MANF	2.413e+06	2.154e+06	1.06343e+06	5.23118e+06	3.63024e+06								HP1BP3	456776
MAP4	175485												HSD17B10	2.3782e+06	1.17883e+06	971197	456330	1.03328e+06
MATR3	537744												HSD17B12	2.14041e+06
MBNL1	364096												HSD17B4	1.23656e+07	995425	399157	422323	536786
MBNL2	364096												HSDL2	1.47433e+06	1.4767e+06	767766	330238	1.07583e+06
MBNL3	364096												HSP90AA1	1.03526e+07	926579	773177		521862
MCAM	4.28472e+07		593991	5.11534e+06	2.17833e+06								HSP90AB1	2.27403e+07			107028
MDH1	821560												HSP90B1	901110		9139.56
MDH2	3.78411e+06												HSPA14	721000
MFAP2	3.09888e+06	495902	86358.3	534885									HSPA1B; HSPA1A	1.63696e+06
MGST1	2.20722e+07	5.01181e+07	3.0389e+07	3.85323e+07	6.19195e+06								HSPA4	2.21222e+06	41734.3	63101.6
MME	1.15489e+07			951399									HSPA5	2.25509e+07	2.96713e+06	2.59938e+06	224677	735716
MTCH2	482471												HSPA8	2.22525e+07				41410.9
MTHFD1	204354												HSPA9	8.58799e+06	2.72845e+06	6.7488e+06	12986689	5.43064e+06
MYO1C	1.12775e+06			105441	113847								HSPB1	1.72606e+07	332787	196919	279102	235886
NARS	315411												HSPB6	182986
NCL	3.27515e+07	136280	200793		265870								HSPD1	4.57734e+06	545544	214895	19767.3
NCSTN	10243161												HSPG2	2.55312e+07	455333	80356.8	428706	1.07899e+06
NEFL	5650880												HTATSF1	300253
NEFM	5650880												HTRA1	3.55163e+06
NID1	364175												HUWE1	292095	100063	112500	102280	90563.9
NIN	3.41031e+06												HYOU1	2.67478e+06	766501	256454	264756	711439
NNMT	588258	410681		340378	140717								IARS	443009
NOLC1	1.40414e+06												IDH1	4.35022e+06
NONO	911661												IDH2	142813
NPC1	6.84157e+06	173776	196409	2.79822e+06	70397.8								IDH3B	166066
NPM1	1.29218e+06												IGF2BP2	274407
NPTN	1.32691e+07												IGF2R	323892
NSDHL	155885												ILF2	351391
P2RY12	883582												ILF3	730729		433134
P4HB	2.03917e+06			665935									ILVBL	169082
PA2G4	857660												IQGAP1	113283
PABPC1	556426												ITGA1	3.80066e+06
PABPC1L	556426												ITGA5	168092
PABPC1L2A; PABPC1L2B	556426												ITGA6	661944
PABPC3	556426												ITGAV	2.55202e+06	209066	136612	113801	478814
PC	693631	4.01833e+06	4.16095e+06	174597	129342								ITGB1	6.82017e+07	765657	163720	85939.1	37259.7
PCBP1	2.01148e+06				102115								ITIH5	380945
PCBP2	5874341		162267										IWS1	361289
PCBP3	2.80166e+06												JAK2	102665
PCBP4	1202031												JUP	79978.1	194338	125490	153955	196800
PCK1	554857												KANK1	358038
PDCD6IP	235997	1124025											KDELR2	78560.8
PDHA1	757250												KIAA0319L	304653
PDIA3	2.26986e+06												KIF5B	607333
PEBP1	1.07891e+06												KPNB1	286146
PFN1	513363												KPRP	434955	354839	238498	430152	757523
PGD	3.31099e+06	304785	2.58636e+06	2.32502e+06	222052								KRT1	1.60761e+08	4.82644e+08	5.24856e+08	4.77342e+08	6.48879e+08
PGK1	669348												KRT2	3.07372e+07	1.03544e+08	1.24689e+08	8.61612e+07	1.98665e+08
PGK2	669348												KRT6B	378363	1.94895e+06	485282	251061	158974
PGM1	836027												LAMA4	3.6477e+06	339767	206822	283867	311670
PHGDH	246998												LAMB1	4.26143e+06	744622	550154	1.20043e+06	488315
PHLDB2		9937027	25403338	65374412	20339274								LAMB2	43504.6	32650.2	44297.8	22159	27958.8
PKLR	1.70918e+06	63759.6											LAMC1	7.62399e+06			20391.6	50834.2
PKM	6.22437e+06	239761			220679								LAMP1	29740125
PLEKHA6	78959.4	236782	294674	642436	432268								LAMP2	2.61532e+06
PLIN1	721727			339413									LANCL1	149574	119576	45884.2	53956.3	62990.8
PLIN4	1.01167e+08	405871	329188	407322	615466								LAP3	592053	61945.6
PLTP	476357												LARS	653681		62494.4	31270.7	191609
PMP2	38196310	401825	198044	457920	844704								LASP1	146867
PNN	1.1053e+06												LBR	155046
POLD1	4.81712e+06												LDHA	1.31148e+07			248059	153799
POR	727639												LDHB	6.72821e+06
POTEE	6.13774e+07	436243	661332	1.41423e+06	1.95415e+06								LGALS1	11891440			195504	184666
POTEF	6.13774e+07	436243	661332	1.41423e+06	1.95415e+06								LGALS3BP	3.52139e+06
POTEI	3.84167e+07	436243	661332	186221	1.47694e+06								LILRB4	540585
POTEJ	3.69407e+07	436243	661332	186221	1.47694e+06								LIMA1	502942
POTEKP	3.59773e+07		113403	1.41423e+06	477206								LIPE	3307233	57198.9	23725.7
PPIA	1.56768e+06			228867									LMAN1	391192	45903.5	57828.1		76390
PPIB	902003												LMNA	4.35878e+07			4.12674e+06	9405320
PRCP	1.41887e+06			126515									LMNB1	7.24232e+06
PRDX1	1.94966e+06	421524		148421	163446								LMNB2	963842
PRDX2	6.03494e+06	816111	308777	1.07503e+06	902572								LNPEP	525263			28641.7
PRDX6	9.32619e+06	200404	314572	289503	63080								LOXL2	102184
PRKAR2A	238532												LPAR1	314263
PRKAR2B	238532												LPL	1.0858e+07	116527	83673.3	337494	67504.3
PROCR	282133												LRP1	1.15725e+07	330488	307861	303466	254826
PRSS3	4.06753e+06	3.88775e+06	5.34409e+06	19293340	7271733								LRPPRC	4.7983e+06
PRSS55	131244160	669204928	431207		87748592								LRRC59	1387606
PSAP	2.051e+06												LSAMP	442987
PTBP1	4.24613e+06	106893											LSS	2.23794e+06	162660	105180		98376.6
PTPRA	442548		68696.1	177612									LTBP2	285447			13887
PXDN	110935												LUC7L2	396253
RAB1A	1120767												LUC7L3	1.29048e+06
RAB1B	1120767												M6PR	2.37975e+06	44910.5
RAB1C	1120767												MANBA	191478
RAB35	5.48372e+06												MANF	1.01592e+06	976502	730515	354513	1.16916e+06
RAB5A	637398												MAP1A	181672
RAB5B	637398												MAP4	485224
RAB5C	637398												MAST4
RALY	2.83674e+06												MATR3	653860
RAP1A	214649			129369									MCAM	1.13029e+07
RAP1B	214649			129369									MCCC1	2.1131e+06		85955.8
RAP1BL	214649			129369									MCOLN1	243308
RBM14; RBM14-RBM4	314585												MDGA1	3259421	4128815	6.70226e+06	3.75875e+06	4781861
RBM25	198874			133166	72144								MDH1	3.60532e+06	1.94351e+06	456937	33600	184326
RBMX	617448	61342.2											MDH2	7.52719e+06	372941	58860.4	42382.9
RBMXL1	617448	61342.2											ME1	3.21851e+06	274988		350392
RETSAT	109731				36910.4								MFAP2	4.31569e+06	2.44277e+06	1.78372e+06	526225	733248
RPL10	415545	1.53983e+06	1.04128e+06	1111244	1365047								MFAP5	3269211	287520	161415	200527	224895
RPL10L	415545	1.53983e+06	1.04128e+06	1111244	1365047								MGLL	283569
RPL13	317946				157306								MLEC	192937
RPL13A	1.16477e+06												MME	7.30835e+06	758976	336922	579118	761718
RPL13AP3	1.16477e+06												MRAP
RPL14	3.61191e+06			209042	55725.9								MRC2	57490.6
RPL15	644620												MRPL13	166502
RPL17	657734												MRPS18B	81898.1			39174	400351
RPL17-C18ORF32; RPL17	657734												MTCH2	1.57511e+06	732919	528093
RPL18	768765												MTDH
RPL18A	1.37991e+06			395846									MTHFD1	1.88193e+06	305731	207992	183331	183692
RPL22	1.92883e+06												MVD	2.10609e+06	82689	173622	79906.8	245874
RPL24	582224												MYH9	2.38201e+06
RPL27	865808												MYL6	540109
RPL27A	905653												MYO1C	3.25511e+07
RPL28	390043		238747	1.08402e+06									MYO1D	761413	655049	390397
RPL29	2.82543e+06												MYOF	150836
RPL3	686610												NADK2; NADKD1	138091			24401.7
RPL35	581242												NAGK	89873.5
RPL37A	525159	109114	455314	910998									NARS	372036	75645.2	31097.9		202242
RPL37AP8	525159	109114	455314	910998									NCL	2.33367e+07	209016	9776.78	55802	79560.3
RPL4	4.55871e+06		23154.7	75260.7	100252								NDUFA10	154698	679727	1.16054e+06	904951	604793
RPL5	7.91776e+06				82723.1								NDUFA11	1.06962e+06
RPL7	2.45716e+06	47336.3		459890									NDUFS1	625002
RPL8	2.17252e+07	229804			494251								NDUFV1	289202
RPLP0	829682	435642	701684										NEK9	285532	417560	141899	181948	814616
RPLP0P6	829682	435642	701684										NFS1	375476
RPN1	363221	213103		288954									NGLY1	189436
RPS11	4.52819e+06												NID1	867095
RPS15	114208												NID2	238614
RPS16	537563												NME2; NME1-NME2	677353
RPS2	1.82624e+07	906039	513663	1.33158e+06	2.07888e+06								NMT2	573484
RPS20	489280		64186.7	255964									NNMT	1.29746e+06
RPS25	457429												NOLC1	798790	61409.9	80408.9	66864.8
RPS27	924334												NOMO1	817503
RPS27A	3.61437e+07	1.0888e+06	347639	848177	2.44796e+06								NONO	222378
RPS27L	924334												NPC1	1.7783e+06			102279	224965
RPS3	2.21325e+06	43145.2											NPM1	1.19866e+06	185132	118086	160991	153424
RPS3A	1.25622e+06												NPTN	6.62348e+06
RPS4X	1.81006e+06		217975	1.26535e+06	314417								NQO1	1.38323e+06
RPS4Y2	975464		217975	1.26535e+06	314417								NRCAM	391143	144825	85786.5		249508
RPS7	151028												NRP1	220095
RPS8	1.40161e+06				1.50808e+06								NSDHL	585757
RPS9	1.15337e+06		32214										NSF	262312
RRAS2	268870												NT5E	797935
RRBP1	3.25851e+07	107600	164121	285003									NUCKS1	3.80416e+06			40172
RTN4	520430												NUP153	237796		278379		229363
S100A6	1.70627e+06												OAT	279127
S100A8	179745	95946.7	238518	513027	400903								OSBPL11	412755
S100A9	235404	158833	440406	755555	880884								P2RY12	363182	58094.9		62909.6	20604.3
SAMHD1	1.21911e+06												P4HA1	163211
SBSN	14091.5	57550	19370.4	52221									P4HA2	139338				62399.3
SCARB2	1.12721e+08	1.72314e+06	167356	2.05326e+06									P4HB	6.88332e+06			358942
SDC2	445332			411977									PA2G4	697860	97975.3	102045	56342.7	177738
SDHA	3.83579e+06	9192063	3164859	9932371	954864								PABPC1	1.21024e+06
SEC22B	480321												PABPC4	80945.6	14311.4
SEC62	7.33876e+06	250295	169233	1.49453e+06	441019								PAFAH1B1	1.52888e+06	503574	1.7341e+06	623469	951459
SELENBP1	950766												PAFAH1B2	322745
SERBP1	845827				110863								PAICS	316767
SERPINB12	124124	347709	225691	412778	312033								PC	6.03002e+06	3.08437e+06	3.65565e+06	373906	220199
SERPINH1	1.75655e+06												PCBP1	6.9209e+06	51275.6		53445.8
SET	1.56914e+06	865696		1.37739e+06									PCBP2	1.14194e+06
SETP18; SETSIP	1.56914e+06	865696		1.37739e+06									PCCA	1.10259e+07	8.26618e+06	6.08959e+06	1.595e+06	1.91609e+06
SFPQ	4.50964e+06		48124.3	147018									PCK1	4.77385e+06	898668	257326	282293
SLC12A4	970889												PCYT2	358228			15944.7
SLC12A6	415488												PDCD6IP	272679
SLC1A3	1.01008e+06				152313								PDGFRB	999272
SLC1A5	1.38733e+07	145337	531112		99601								PDHB	868323	137429	127524	77193.1	213744
SLC22A3	546432												PDIA3	5.79553e+06
SLC25A3	370008												PDIA4	940615	148522	208755	193988
SLC25A31	1.9737e+06												PDIA6	695967	198760	397793		380440
SLC25A4	3.79282e+06												PDZD7		214399			326935
SLC25A5	5.72267e+06												PEBP1	2.81522e+06
SLC25A6	7.75547e+06												PEPD	518909	97476.2	42915.9	107561	168595
SLC27A3	785300												PFKL	187232
SLC3A2	1.6446e+06												PFN1	1.67399e+06
SND1	775666												PGAM1; LOC643576	3.80627e+06		144103
SPPL2A	586244				140739								PGD	6.44812e+06	103474	43948.6	261202
SRPX	2.67965e+06	98290.8											PGK1	6.2216e+06		61580.2	95856.6
SRRM1	503127	347737											PGM1	3.57772e+06	82214.8	76037.3	37134.6	72235.6
SRRM2	500396												PGRMC2	416904
SRSF10; LOC100996657	191649												PHGDH	671091				66851.6
SRSF11	241594	239943	257298	240241	216585								PHPT1	143245
SRSF2	16173278	84719.2											PITRM1	98931.1
SRSF3	1.08982e+06		138584	757362	374069								PKM	8.38605e+06
SRSF4	1.16709e+06	34980.7		478982	1.12647e+06								PLAA	81869.6
SRSF5	2.11208e+06	162180	217703	578348									PLBD2	326512
SRSF6	1.3017e+07		73340.8										PLD3	731101
SRSF7	6.79421e+06		213227	244027									PLEC	1.00818e+07		963670	23032.1	503134
SRSF8	16173278	84719.2											PLIN1	9.41352e+06	198730		115714	36769.2
SSB	3.38585e+06												PLIN4	1.33531e+09	8.50704e+06	6.07968e+06	7.8498e+06	9.18826e+06
SSRP1	738624												PMVK	3573879	8709899	9253404	6711852	13021280
STBD1	277123												PNN	782339
SV2A	1.03192e+06			68721									PNPLA2	142981
SYNCRIP	7983584	62856.8	100661	1.2679e+06									POR	721073	470462	355588	184146	267383
TAF15	439739												PPA1	420188
TALDO1	506486												PPA2	453984
TARDBP	2.26036e+06	31029.3											PPIA	5.51063e+06	3.64173e+06		1.70135e+06	5.53121e+06
TGM3	227474	593670		115445	791555								PPIB	2.04972e+06				154124
TGOLN2	1.8532e+06			130485									PPP2R1A	242747
THRAP3	3.86842e+06												PRCP	2.14594e+06	17053.5
THY1	5.40413e+07												PRDX1	597387
TIAL1	984092	40347.4											PRDX2	3.49785e+06	420475	236014	63589	399312
TKT	5.52375e+06	49832.9	43071.9	126712	111863								PRDX3	971135
TMED10	1.36434e+06	58249	60457	50684.4									PRDX4	1.22597e+06
TMEM106B	1.36221e+06												PRDX6	912962	58215.9		29262.5
TMEM119	2.2779e+06	157309	99797	555282	225700								PREP	195620	88421.4	495570	173883	195658
TNC	2.65348e+07		262320										PRKAA1	85101.3
TNFRSF1B	1298586	2.08593e+06	816356	625505									PRKAR1A	568902
TPI1	787959												PRKAR2B	1022652
TRA2A	1747456	190535	152414	189457	112844								PRKDC	1.66757e+06
TRA2B	737472	38152.9	163852		147477								PRNP	878909			51352.6
TSPAN3	11416270												PRPF8	259777
TST	177852	51799.5	84977.3										PRPS2	192878
TUBA1A	4.48479e+07	2.0509e+06	347866		1.38072e+06								PRRT4	194324
TUBA3D; TUBA3C	2.1931e+07	2.0509e+06	347866		1.38072e+06								PRSS3	1091528	628823	1.75239e+06	1.16554e+06	1398508
TUBA3E	2.1931e+07	2.0509e+06	347866		1.38072e+06								PSAP	4.63866e+06	841840	1.30381e+06	141349
TUBA4B	4.90575e+06												PSAT1	428671
TUBB	2.40522e+07			367501									PSMA2	430696
TUBB2A	3.45836e+06		217705										PSMA3	936928
TUBB2B	3.45836e+06		217705										PSMA6	3.30246e+06	52825.1	38404.5	25876.6
TUBB3	2.75772e+06												PSMA7	300288
TUBB3	2.75772e+06												PSMB1	1.22757e+06	4.21977e+06		15262.9	61247.7
TUBB4A	1.24115e+07												PSMB3	4.30388e+06	9790725	9478381	10126980	7705192
TUBB4B	1.80209e+06												PSMB5	7.00306e+06			29595.5
TUBB6	2.13615e+06												PSMB6	1.38305e+06
TUBB8	2.0456e+06												PSMD11	237854
TUFM	944363			433808									PTBP1	1.91215e+06	89892.2	27851.7		34489
U2SURP	305451												PTGFRN	375352
UBA52	3.61437e+07	1.0888e+06	347639	848177	2.44796e+06								PTPRA	281387	253680			439415
UBB	3.61437e+07	1.0888e+06	347639	848177	2.44796e+06								PTPRK	180645
UBC	3.61437e+07	1.0888e+06	347639	848177	2.44796e+06								PTRF; CAVIN1	2.04265e+06
UBTF	1.18779e+06												PURB	72744			86436.6
UGDH	155112												PXDN	737396
VDAC1	617373	74251.6											QDPR	1.10915e+06
VDAC2	3.9522e+06												RAB10	288705
VDAC3	534169												RAB11A	448219
VIM	5.23666e+07		284212										RAB14	917457	260553	1.35895e+06	330220	1.51586e+06
WDR1	578719												RAB1A	3.02279e+06
XPO1			74601		9252763								RAB21	385981
YBX1	6.03286e+06	394114	37056.1	571266	310657								RAB2A	1.56977e+06		209361
YBX2	1.58694e+06	253817		544685	310657								RAB5C	1.16053e+06
YWHAQ	387305												RAI14	353687	252281	392995	245665	348061
ZRANB2	4.75909e+06												RALY	804509
SBSN	14091.5	57550	19370.4	52221									RALYL	779962
													RAN	2.87148e+06		762564
													RBM39	266528
													RBM4B	208373
													RBMXL1	904525
													RCC2	123757
													RDH11	264581
													RETSAT	1.56792e+06
													RFTN1	224316
													RHEB	1.52045e+06
													RHOG	260984
													RNH1	507632
													RPA1	113196
													RPL10	682274			17069.9
													RPL10A	227519
													RPL11	1.98353e+06	112226	60107.9	83769.5	67614.3
													RPL12	522592
													RPL13	519868	1.33024e+06	558293		3318145
													RPL13AP3	1.77186e+06	108499	58881	80772.8	76105.3
													RPL14	1.79293e+06	142467	143256	242529	182610
													RPL17	628018
													RPL18	4.82151e+06	273252	96802.7	332492
													RPL18A	4.33588e+06	108147	140742	134082
													RPL19	2034984
													RPL27A	4.72128e+06	693473	332035	311761	535764
													RPL28	546916	175195	69012.5	68589.7	274931
													RPL29	2.99969e+06
													RPL3	4.02052e+06	386160	206720	204100	286570
													RPL30	4.06541e+06
													RPL31	1.7602e+06			143013
													RPL34	3.47929e+06	208590	173833	151078
													RPL35	1.11191e+06			66361.1
													RPL36AL	415712	222093	145012	209008	189346
													RPL37A	1.33643e+06		38420.9
													RPL4	9.97922e+06	1.95562e+06	1.20486e+06	2.28236e+06	797300
													RPL5	5125463		73973.1		74475.9
													RPL6	3.39498e+06	190824	174843	217175
													RPL7	2570605	321556		276749	134408
													RPL7A	356790
													RPL8	3.343e+07	559838	543136	1.07249e+06	940561
													RPL9	147045	147710	179518	137015	139083
													RPN1	1.9743e+06	486881		415310
													RPN2	229130
													RPS11	2.94214e+06			46556.7
													RPS14	3.2923e+06	72410.9	31888	32524.6
													RPS18	1.01611e+06
													RPS2	3.81321e+07	1.35794e+06	848060	1.25534e+06	1.99156e+06
													RPS20	101191
													RPS26; LOC101929876; RPS26P25	3.1318e+06			91117.3
													RPS28	283021
													RPS3	5.02752e+06	78380.5	386185	454569	75097
													RPS3A	141888
													RPS4X	1.35707e+06
													RPS4Y1	172058
													RPS5	753786		24194.5	13533	23327.7
													RPS6	1.69192e+06
													RPS7	3.8755e+06
													RPS8	6.90984e+06			143541
													RPS9	1.03997e+06
													RPSA	376072
													RRAGC	281359
													RRAS	193446
													RRBP1	1.59428e+07	32380.4		205651	216548
													RTF1	185005
													RTN4	619283
													RUVBL1	182135
													S100A10	743841
													S100A8		134574	29264	84955.2	79508
													S100A9	119171	124997	206449	146124
													SACM1L	322197	264419	208621	23497.1	132682
													SAMHD1	1.53583e+06
													SAP18	295321
													SAR1A	1998221
													SARS	1370472
													SBDS	180173
													SCARB2	4.14974e+07	159528	135722	206923	245583
													SCD	2165912				105049
													SCP2	771869
													SCRN1	226135
													SDC2	384209	90661.1	16385.5	42205.8
													SDHA	9.44388e+06	380868	210986	170246	136102
													SEC23A	993239				89548.7
													SEC31A	730278
													SEC61B	425271
													SEC62	6434032	656359	146646		943616
													SEC63	716846
													SEH1L	115279		44682.7	37340.9	56711.1
													SELENBP1	1.06663e+06	80918.8	33255		158760
													SEPT9	407312
													SERBP1	929876	75444.7	26529.1
													SERPINB6	992539	54085.5	33215.5	47254.3	185628
													SERPINH1	8.27115e+06			1.04449e+06
													SFPQ	5.47569e+06			58337.8
													SH3BGRL	193050
													SHMT1	119591
													SHMT2	639344
													SLC12A4	996546
													SLC1A3	177061
													SLC1A5	1.6598e+06		13568.3	22871.5	24591.3
													SLC25A3	550343	34319.9	59085.8	34181.8
													SLC25A4	2.46525e+07	42737.7	46190.5	249816	46651.5
													SLC25A6	7.36391e+06
													SLC29A1	633212
													SLC2A4	1.09865e+06	150379	303923	85477.7	267092
													SLC3A2	3.78562e+06
													SLC44A2	298592
													SLC7A6	790752
													SLIRP	180459
													SND1	2.58288e+06			60400.8
													SNRNP200	248285
													SNRNP70	94809.2
													SNRPD3	541962
													SNTB2	843477	262634	152275
													SORD	246733
													SORT1	201327
													SPTAN1	813848	87026.9	25961.8		183814
													SPTBN1	2.90694e+06	824411	666530	1.02756e+06	906241
													SRM	795953
													SRPRB	493244
													SRPX	204195	73133.8	95212.4	102398	63112.2
													SRRM2	2.0181e+06		53508.5	141874
													SRSF1	837292	70714.3	39004.1	46878.9
													SRSF10; LOC100996657	269392
													SRSF11	571477	603081	387063	452302
													SRSF3	828777	116738
													SRSF6	1.17418e+07	921986	367459	460492	360077
													SRSF7	7060357	183052	152649	133892	91364.3
													SRSF8	8540180		374573	215396	282109
													SSB	1.85749e+06
													STAT3	461234	1.80137e+06	508926	332139	1.74567e+06
													STAT5A	92532.8
													STBD1	481798				148249
													STON1-GTF2A1L; STON1	148667			75458.1	90739.6
													STRAP	850492
													STT3B	356626
													SUCLA2	265064
													SUCLG1	1.63596e+06
													SUGT1	174559			267934
													SUMO2	1.08427e+06
													SV2A	1.77497e+06	112618
													SVIL	1.74473e+06
													SYNCRIP	2.38473e+06				60427.6
													SYNM	143240
													SYPL1	954513
													TAGLN2	43893.3
													TALDO1	3.01301e+06
													TBCD	94441.6
													TBL2	155998
													TCOF1	117077
													TCP1	756812
													TECR	224905	34403.6	31546.7
													TF	920676
													TFAP2D	209631	77987	217741	200089	223863
													TGM2	262984		96591.1	78968.8	58913.6
													TGOLN2	397940
													THBS1	179360
													THRAP3	3.46527e+06		18740.1
													THY1	470450
													TIAL1	781806		84580.2		151495
													TKT	1.09894e+07	24375668	8683.69	15270.4	196246
													TLN1	1.5738e+06		154074	19326.9
													TLN2	884299
													TMED10	563274
													TMED2	925966
													TMED7-TICAM2; TMED7	241101	119802	49584.8	30184	117678
													TMEM106B	992442		26959.2
													TMEM135	76291.7
													TMEM179B	360585
													TMEM30A	251079
													TMEM33	129603
													TNC	4.11623e+07	416028	323883	134562	394896
													TNFRSF10D	271884
													TNKS1BP1	242186
													TNPO1	397766		146040	90800.1
													TNS1	120207
													TOP1	1.22233e+06
													TOR1AIP1	96266
													TPI1	4.73194e+06		51916.3	70228.5
													TPRA1	176362
													TRA2B	191743	276558	330355	234593	701133
													TRHDE	143420
													TRMT10C	407995
													TTC7A		526967	1.82804e+06	1.00969e+06	847486
													TUBA1A	5.30184e+07	2.54967e+06	1.15522e+06	626705	369043
													TUBA4B	9.54026e+06	496496	159054	243204	205885
													TUBB	678318	33027.4	38549.1	14488.7	42991.2
													TUBB2A	1.30538e+07	702958	94285.5	173107	375328
													TUBB3	462403
													TUBB4B	1.51082e+06
													TUBB6	515356			27363.5
													TXNDC5	277054		29948.7
													U2SURP	414797
													UBA1	223023
													UBA52	1.70449e+07	258344	186474	257630	207909
													UBR4	169943
													UBTF	829032
													UBXN4	254211
													UCHL1	1.40131e+06
													UGDH	382161	20864.3	8146.18	11332.1	18734.6
													UGP2	410745	164027	76005.7	56700.1	250033
													UPF1	378493
													UQCRC1	974769		67372.1	36363.4
													UQCRC2	1.72954e+06
													UQCRFS1P1	1.13183e+06
													USP14	3.29932e+06
													USP5	293308	194098	23923.1		66006.8
													USPL1	158229	2.04466e+06	58717.3
													UTRN	297280	308535
													VARS; VARS2	285568
													VCAN	172799
													VCP	1.23028e+06	25879.4	68708	129458	128089
													VDAC1	7.3311e+06				44544.1
													VDAC2	3.34093e+07			37168.7	157627
													VDAC3	2.79071e+06			1.60113e+06
													VIM	1.01194e+08
													VPS13C	83629
													WDR1	7.83902e+06	639261	63583.4		142742
													XPO1	88102.3
													XRCC5	524897
													XRCC6	557431	171869
													YBX1	9.10128e+06	446499	229565	101096	102135
													YWHAE	179367
													YWHAQ	1.449e+06
													YWHAZ	260308	236247		184159
													ZBED5	724401	525239
													ZG16B	47056	28626.2		110454
													ZRANB2	1.99032e+06				605092
